# Supplementary material for: Improving Aileron Effectiveness Based on Changing the Position of Aileron Connectors
Source: Hindawi journal article supplement (doi:10.1155/2019/5046395), 2019-06-04

# WORKSHOP 2

## ANTI-SYMMETRIC WORKSHOP



# Aircraft Description

- **Wingspan: 12 m**
- **Chord: 2 m**
- **Leading Edge: 0.3 m aft of datum**
- **Nodes: 2 m forward of datum**
- **Length: 7 m**

- **Workshop Objectives**
  - View elastic and rigid deformations and loads
  - Verify splines
- **Software Version**
  - Flightloads 2014
- **Files Required**
  - Sol\_example\_2a\_modes.bdf
- **Problem Description**
  - Half model
  - Vertical surfaces
  - Control surfaces 'Welded' – apart from the aileron
  - Anti-symmetric about XZ plane
  - Flexible aileron hinge

- **Suggested Exercise Steps**

1. Launch Flightloads
2. Create a New Database
3. Import Structural Mesh file i.e. sol\_example2a\_modes.bdf
4. Run Normal Modes file
5. Attach XDB file to Patran
6. View Results
7. Switch Preference to Aero-elasticity
8. Create Flat Panel Modeling
9. Create Splines
10. Verify Splines
11. Animate Splines
12. Setup 7 Trim Case to study roll rate at varying speeds
13. View Results

# Step 1. Boundary Conditions

- Import sol\_example2a\_modes.bdf into Patran
- Display boundary conditions

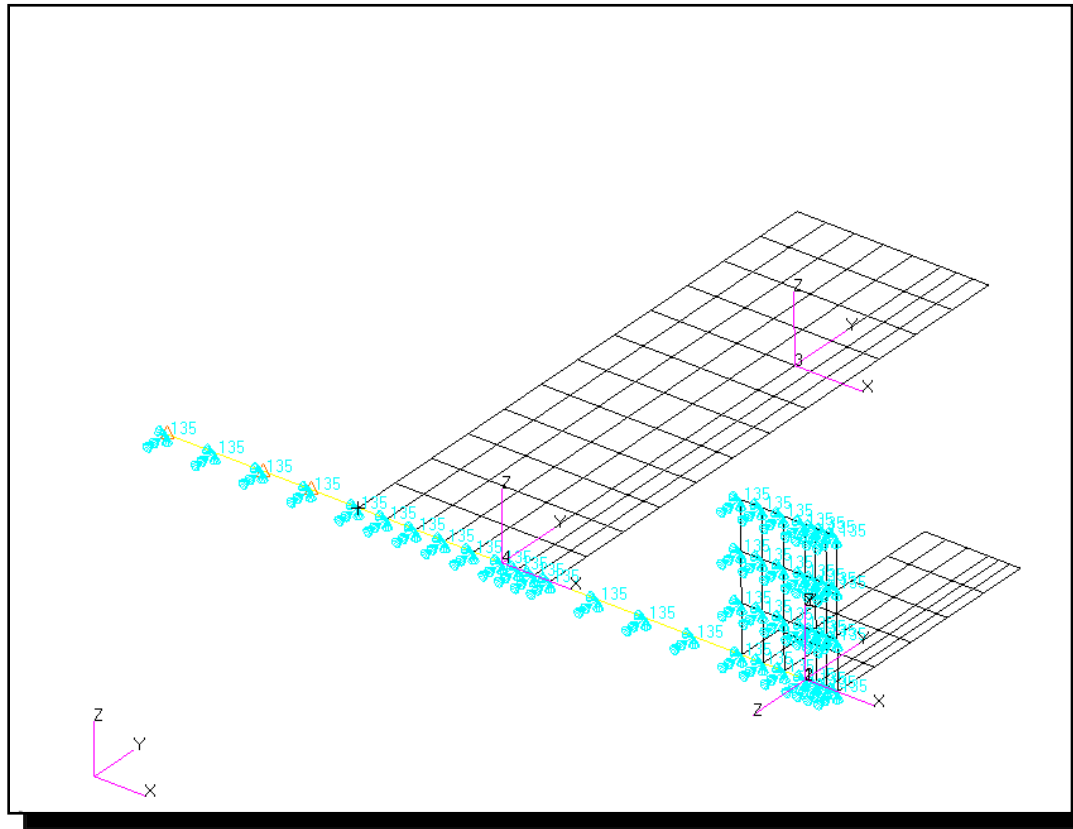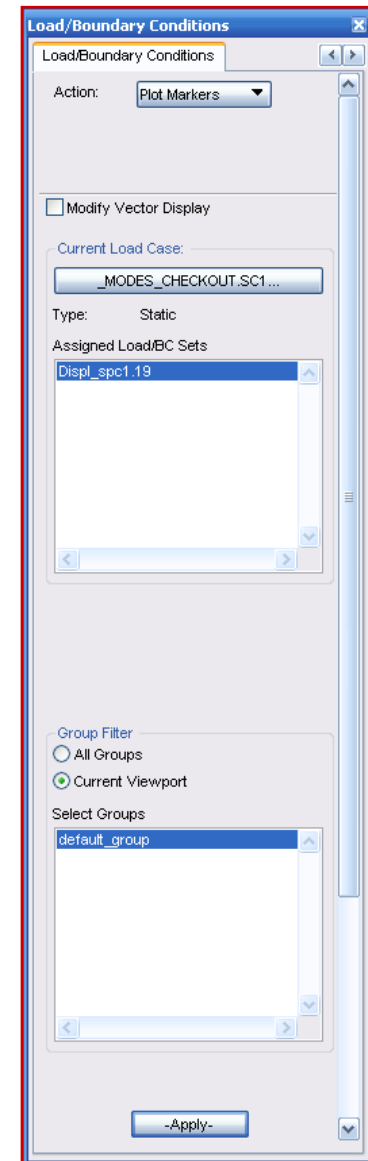

## Step 2. Run File and Attach XDB to Patran

- Run modal analysis (sol\_example2a\_modes.bdf)
- Check .f06 file
  - Identify:
    - 3 rigid body modes
    - Elastic modes
- Attach .xdb in Patran
  - Identify :
    - 3 rigid body modes
    - Significant elastic modes

# Step 3. Results

- **Results expected**
  - 3 rigid body modes

– Significant elastic modes

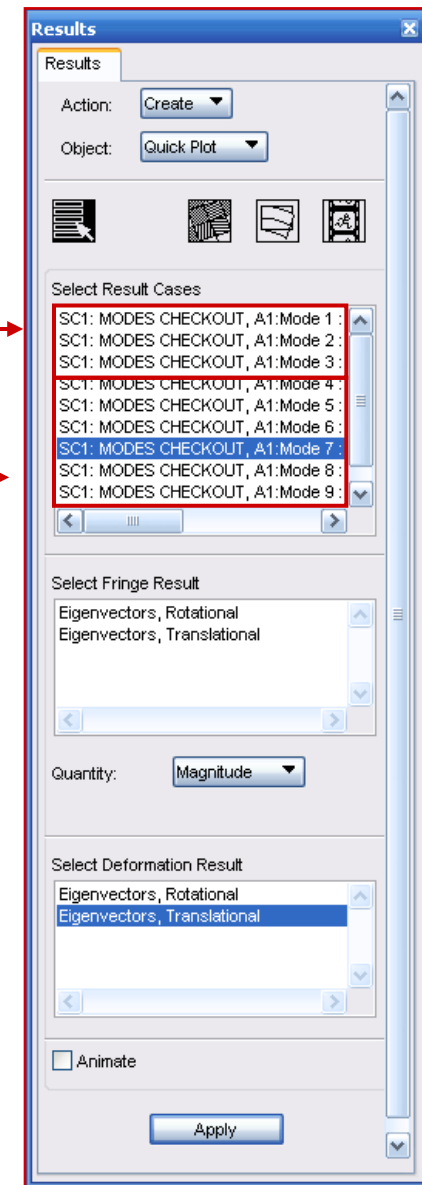

# Significant Elastic Modes

Deform: SC1: MODES CHECKOUT, A1 Mode 4 : Freq. = 1.2754, Eigenvectors, Translational.

Mode 4

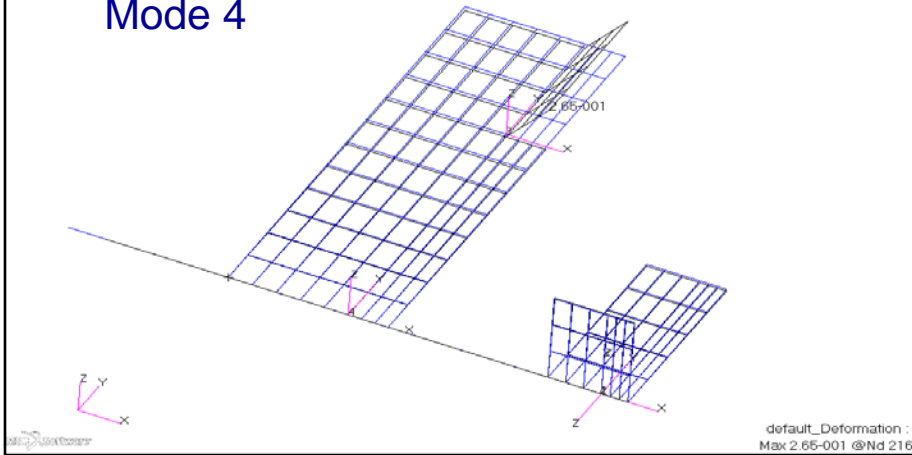

Deform: SC1: MODES CHECKOUT, A1 Mode 5 : Freq. = 8.2599, Eigenvectors, Translational.

Mode 5

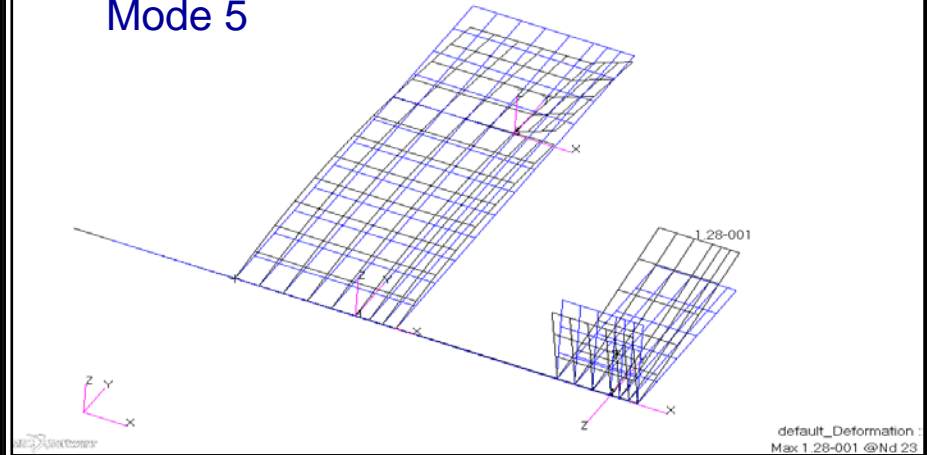

Deform: SC1: MODES CHECKOUT, A1 Mode 6 : Freq. = 14.81, Eigenvectors, Translational.

Mode 6

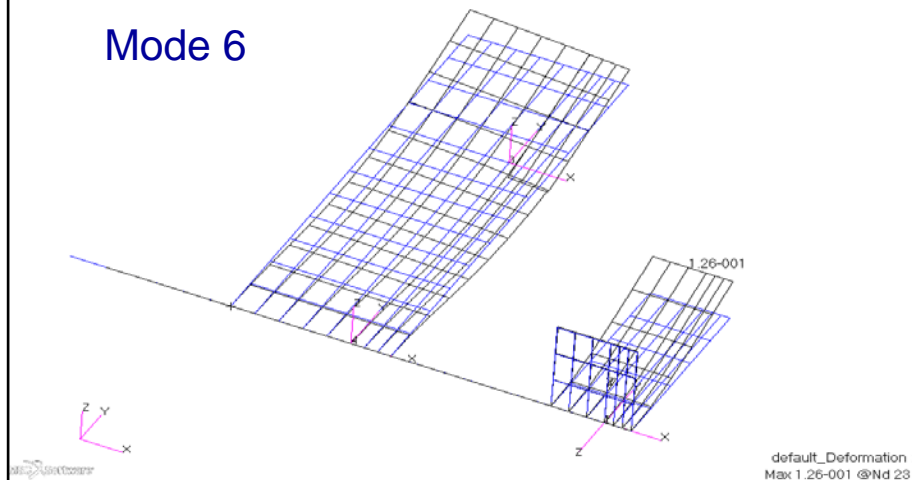

Deform: SC1: MODES CHECKOUT, A1 Mode 7 : Freq. = 17.856, Eigenvectors, Translational.

Mode 7

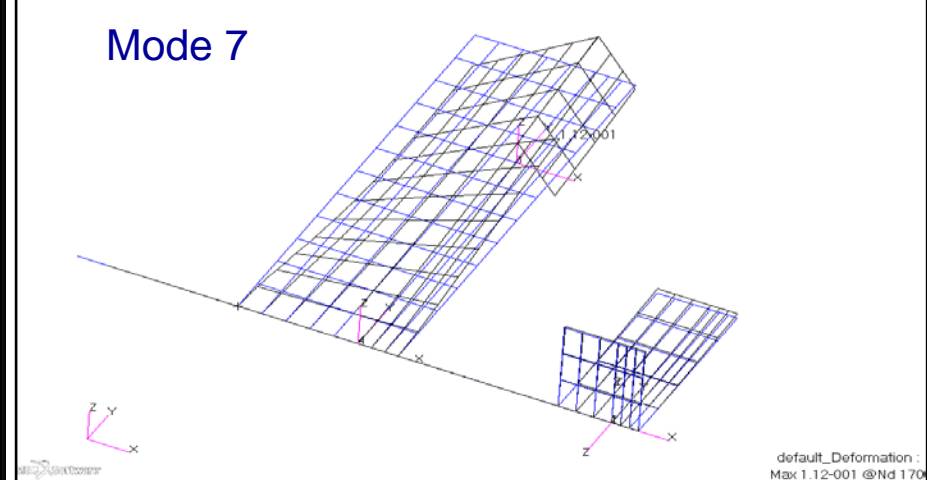

# AERODYNAMIC MESH

# Structural Mesh

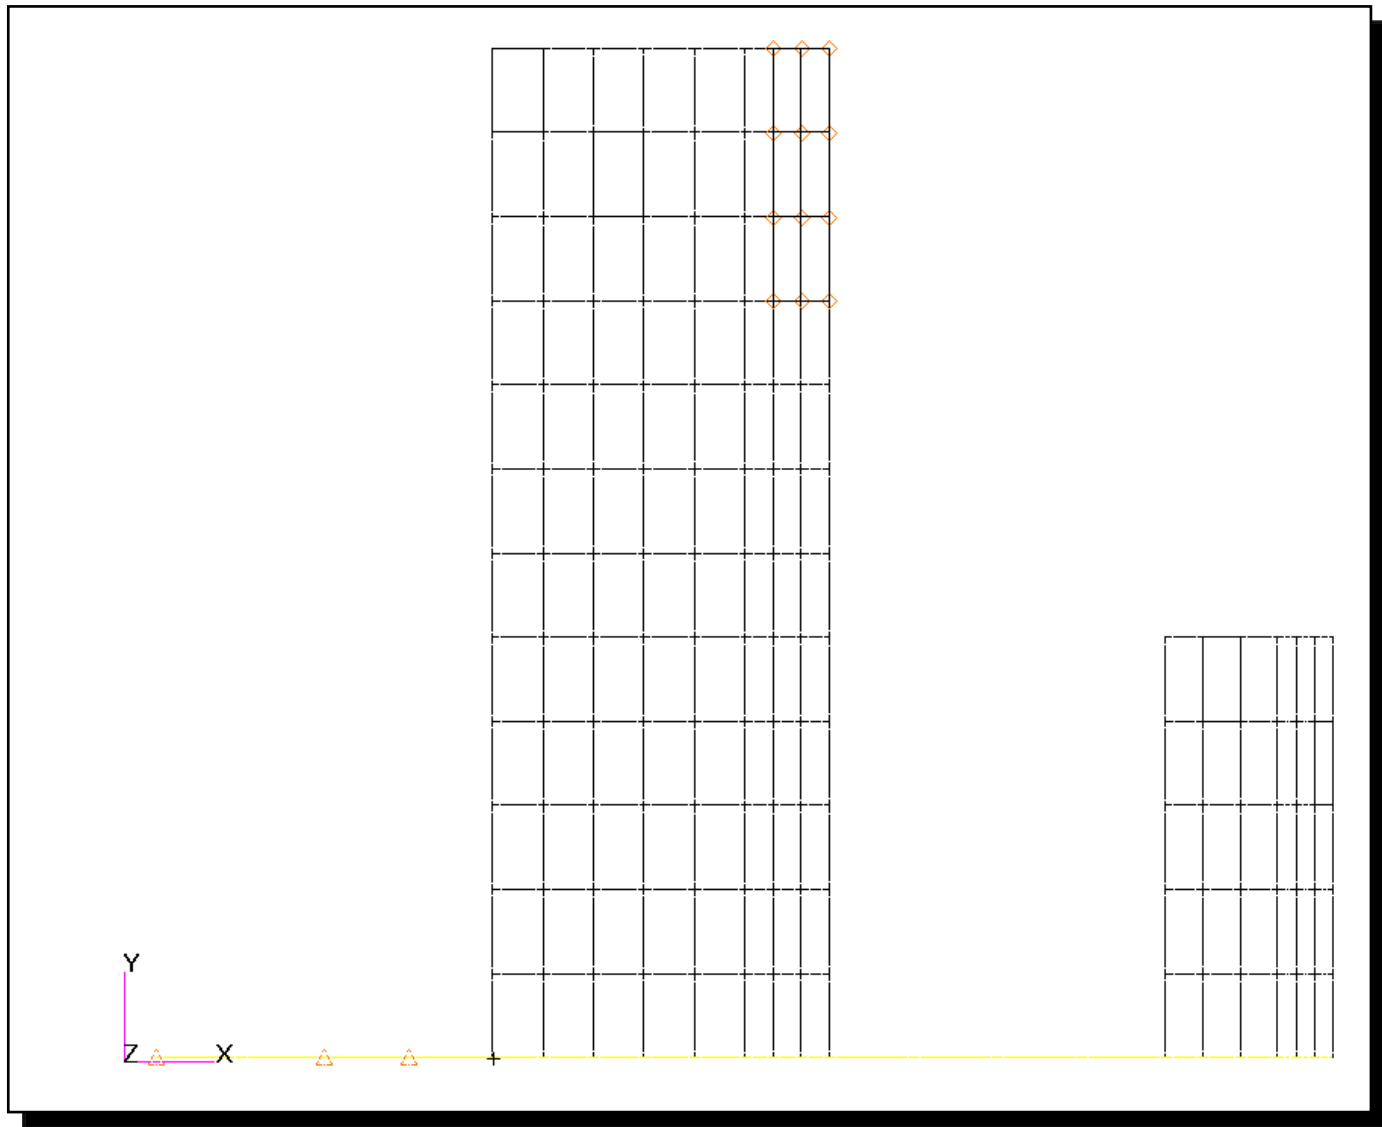

# Suggested Aero Mesh

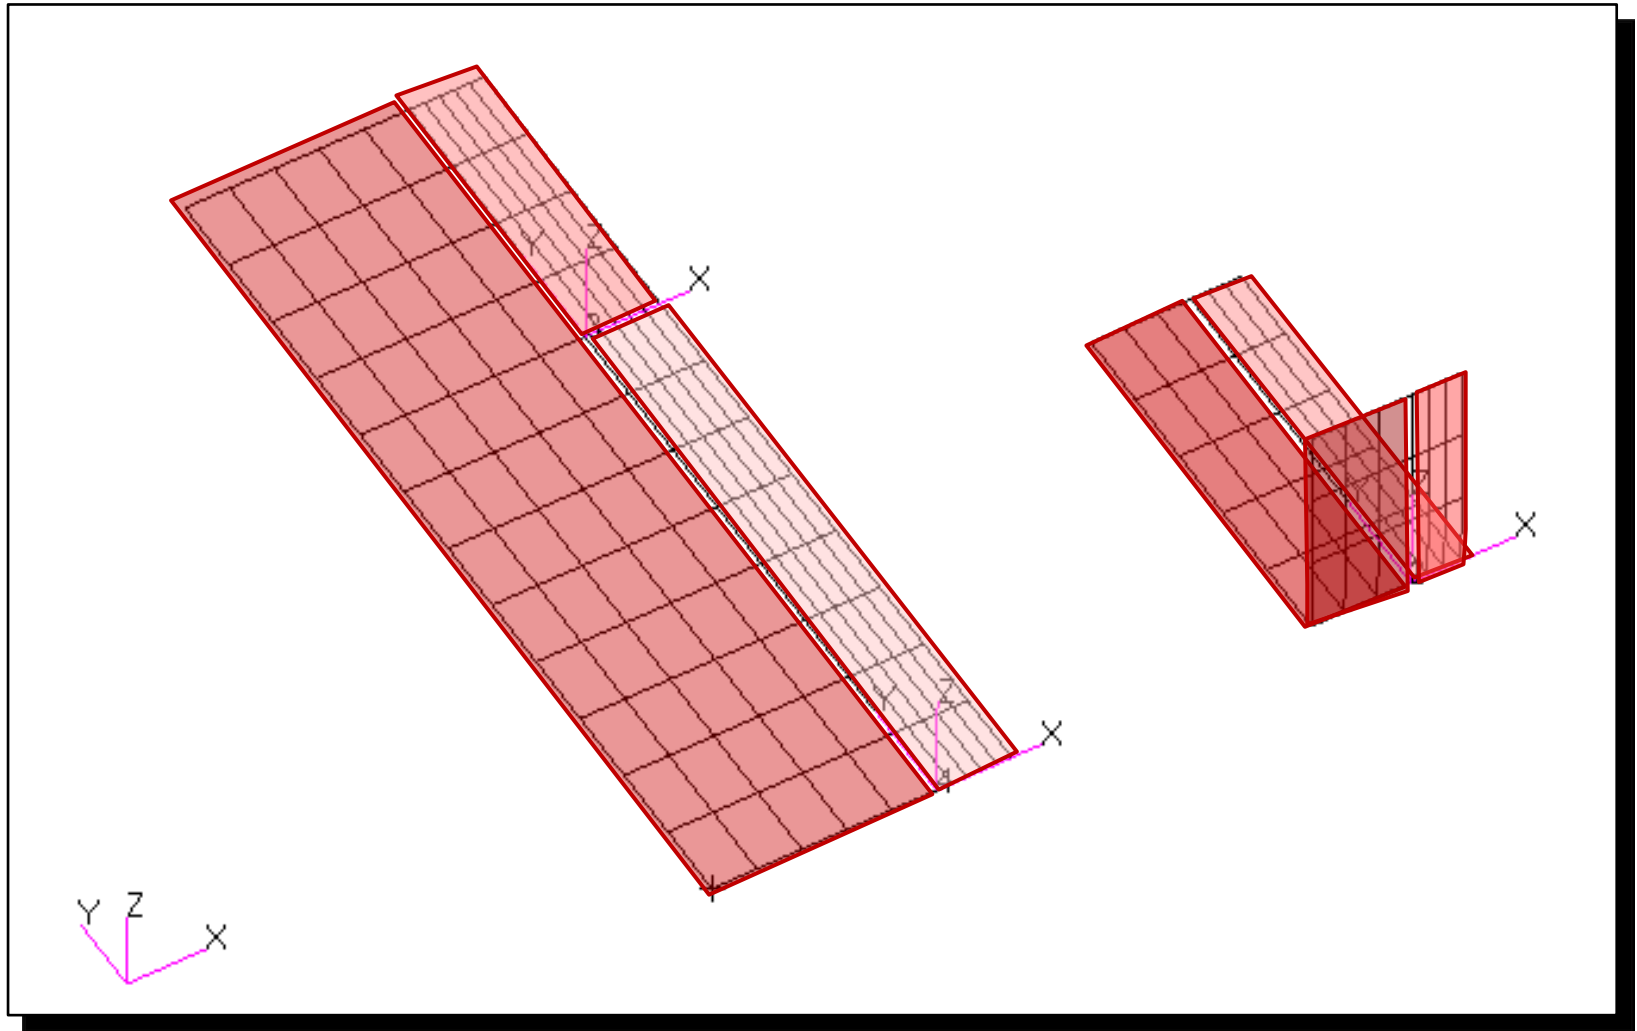

# Create Flat Panel Modeling

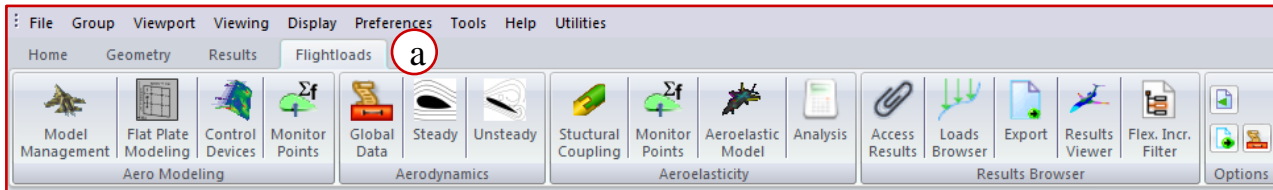

- **7 Aero-meshes need to be created.**

- Main wing
- Wing tail
- Aileron
- Tail
- Elevator
- Fin
- Rudder

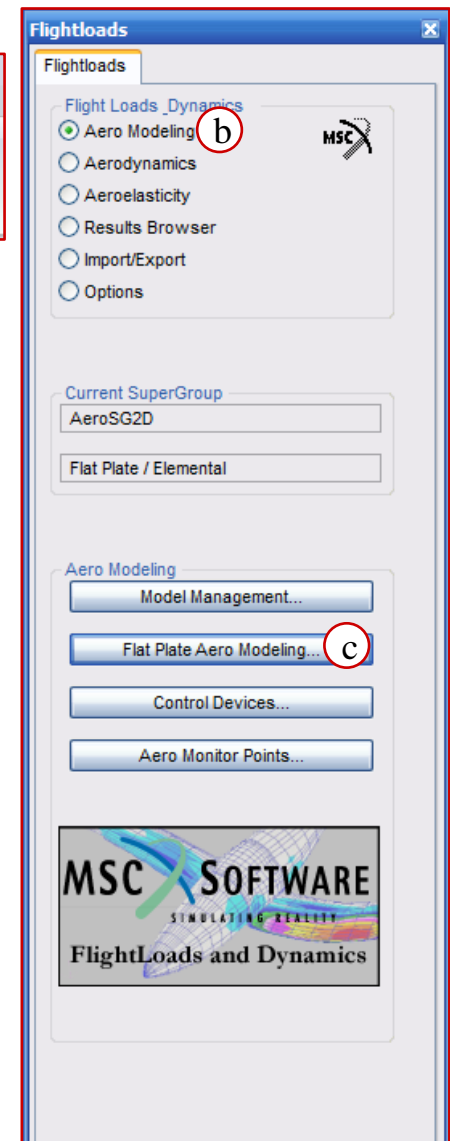

# Create Flat Panel ID- 100001

- This is Flat Aero Surface for Main Wing

The image displays three software dialog boxes used for creating a flat aero surface, with specific fields and buttons labeled with letters a through m.

**Lifting Surface Data**

- Reference Coord System: Coord 0
- Starting Element ID: 100001 (labeled **k**)
- Interference Group ID: 1
- Associated Bodies: None
- Buttons: OK (labeled **l**), Cancel

**Mesh Control**

- Span Mesh: Uniform
- Diagram: A line segment with a central point and arrows indicating spanwise direction.
- Number = 12 (labeled **g**)
- Chord Mesh: Uniform
- Diagram: A line segment with a central point and arrows indicating chordwise direction.
- Number = 5 (labeled **h**)
- Buttons: OK (labeled **i**), Cancel

**Flat Plate Aero Modeling**

- Action: Create
- Object: Lifting Surface
- Method: 4 Points
- Diagram: A grid showing the span and chord directions, with points 1, 2, 3, and 4 marked.
- Existing Surfaces... button
- Surface Name: wing\_100001 (labeled **a**)
- Auto Select checkbox (checked)
- Point 1: Node 81 (labeled **b**)
- Point 2: Node 175 (labeled **c**)
- Point 3: Node 200 (labeled **d**)
- Point 4: Node 126 (labeled **e**)
- Mesh Control... button (labeled **f**)
- Optional Data... button (labeled **j**)
- Buttons: Apply (labeled **m**), Cancel

# Create Flat Panel ID- 101001

- This is Flat Aero Surface for Wing Tail

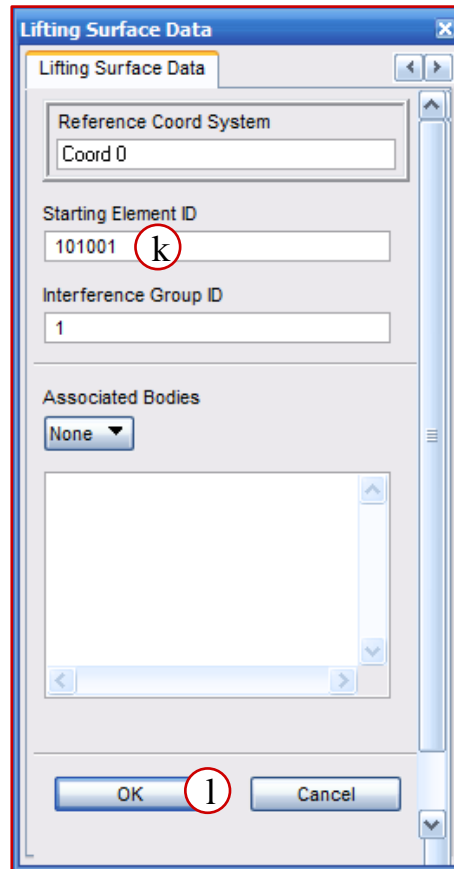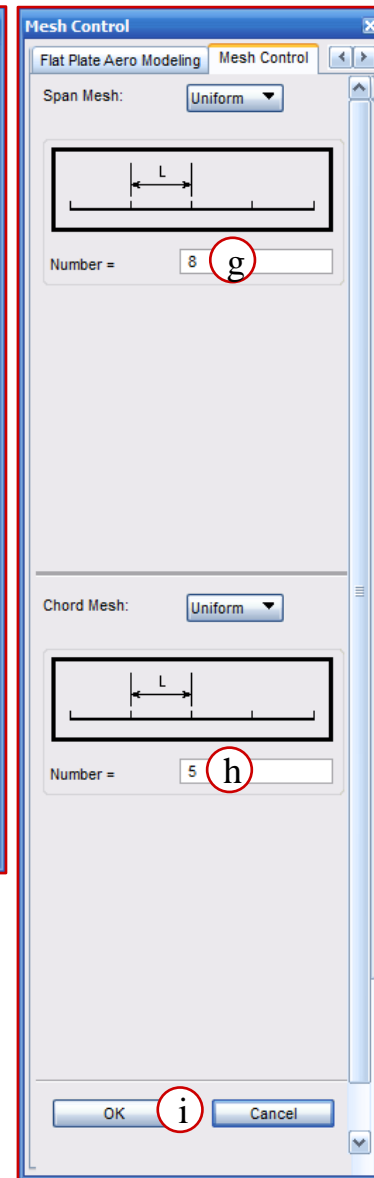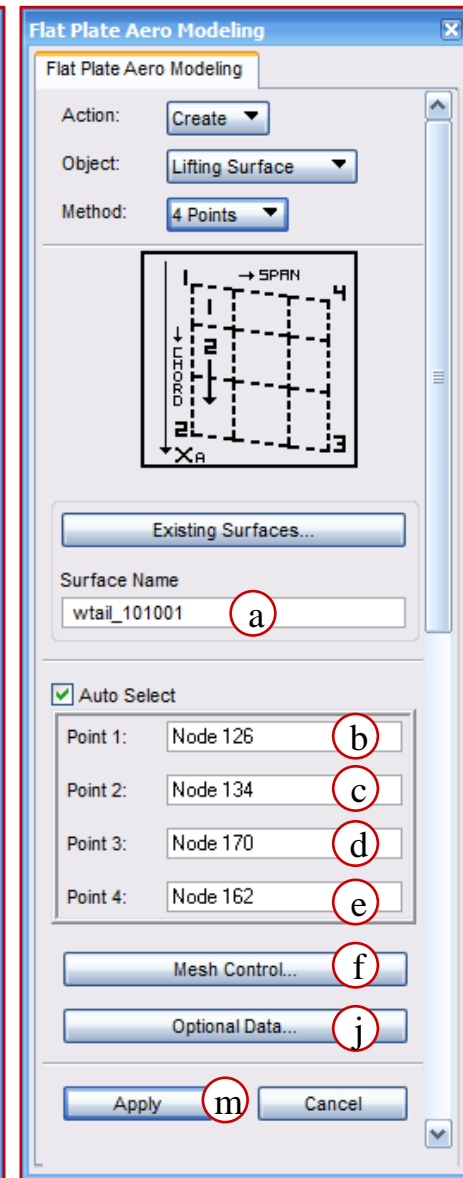

# Create Flat Panel ID- 102001

- This is Flat Aero Surface for Aileron

**Lifting Surface Data**

Lifting Surface Data

Reference Coord System  
Coord 0

Starting Element ID  
102001 **k**

Interference Group ID  
1

Associated Bodies  
None

OK **l** Cancel

**Mesh Control**

Flat Plate Aero Modeling Mesh Control

Span Mesh: Uniform

Number = 4 **g**

Chord Mesh: Uniform

Number = 5 **h**

OK **i** Cancel

**Flat Plate Aero Modeling**

Flat Plate Aero Modeling

Action: Create

Object: Lifting Surface

Method: 4 Points

Existing Surfaces...

Surface Name  
aileron\_102001 **a**

☒ Auto Select

Point 1: Node 134 **b**

Point 2: Node 200 **c**

Point 3: Node 220 **d**

Point 4: Node 170 **e**

Mesh Control... **f**

Optional Data... **j**

Apply **m** Cancel

# Create Flat Panel ID- 103001

- This is Flat Aero Surface for Tail

The image displays three software dialog boxes used for creating a flat aero surface, with specific elements marked by letters a through m.

**Lifting Surface Data**

- Reference Coord System: Coord 0
- Starting Element ID: 103001 (k)
- Interference Group ID: 1
- Associated Bodies: None
- Buttons: OK (l), Cancel

**Mesh Control**

- Span Mesh: Uniform
- Diagram: A line with a segment labeled 'L'.
- Number = 5 (g)
- Chord Mesh: Uniform
- Diagram: A line with a segment labeled 'L'.
- Number = 3 (h)
- Buttons: OK (i), Cancel

**Flat Plate Aero Modeling**

- Action: Create
- Object: Lifting Surface
- Method: 4 Points
- Diagram: A grid with points 1, 2, 3, 4 and labels SPAN, CHORD, X<sub>R</sub>.
- Existing Surfaces... button
- Surface Name: tail\_103001 (a)
- Auto Select: ☒
- Point 1: Node 1 (b)
- Point 2: Node 21 (c)
- Point 3: Node 24 (d)
- Point 4: Node 4 (e)
- Buttons: Mesh Control... (f), Optional Data... (j), Apply (m), Cancel

# Create Flat Panel ID- 104001

- This is Flat Aero Surface for Elevator

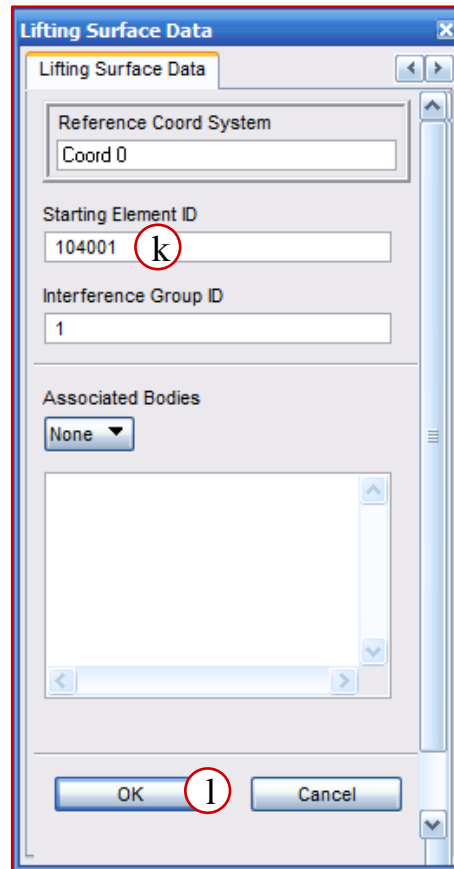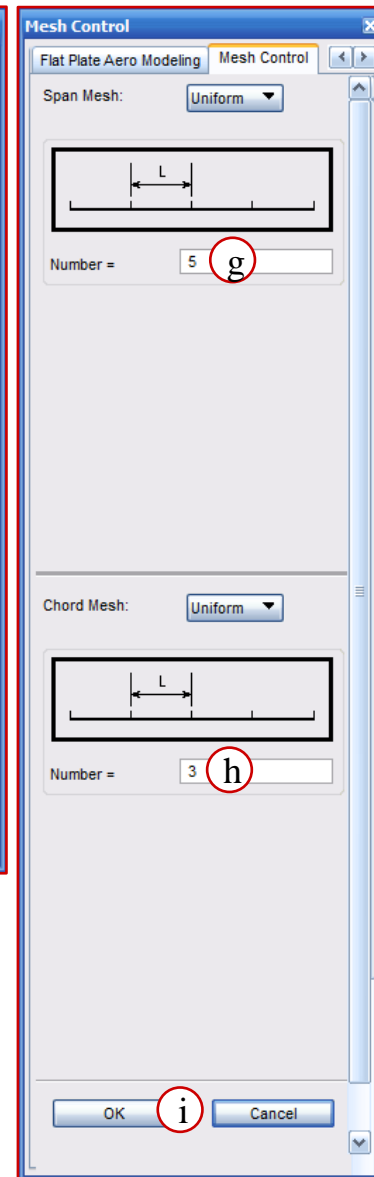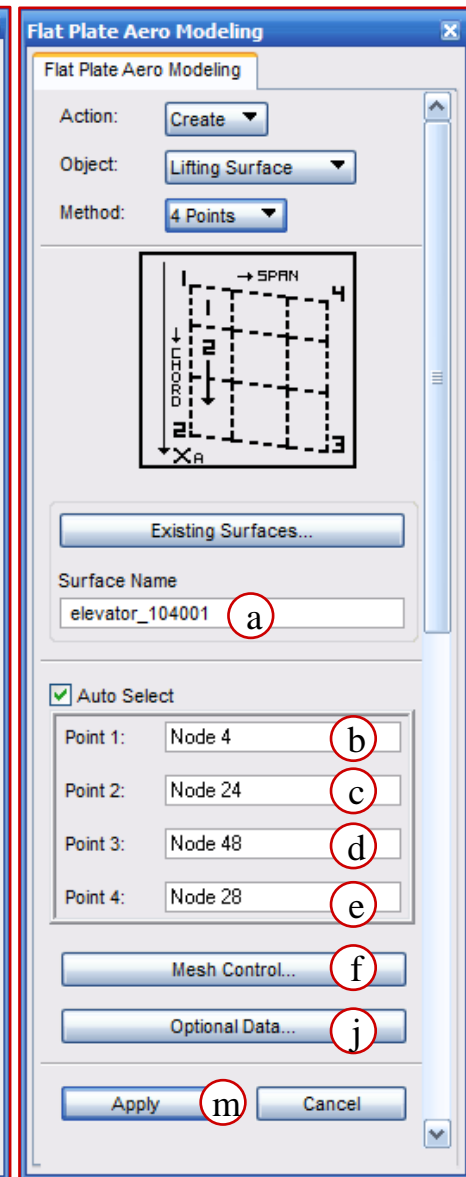

# Create Flat Panel ID- 105001

- This is Flat Aero Surface for Fin

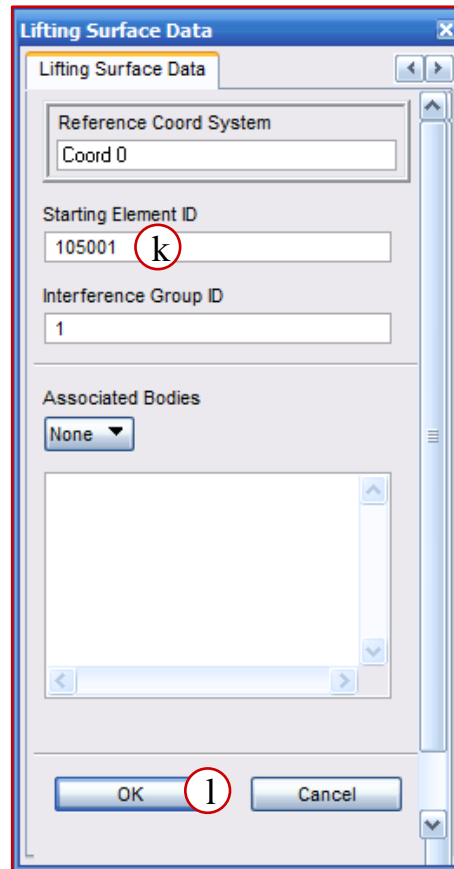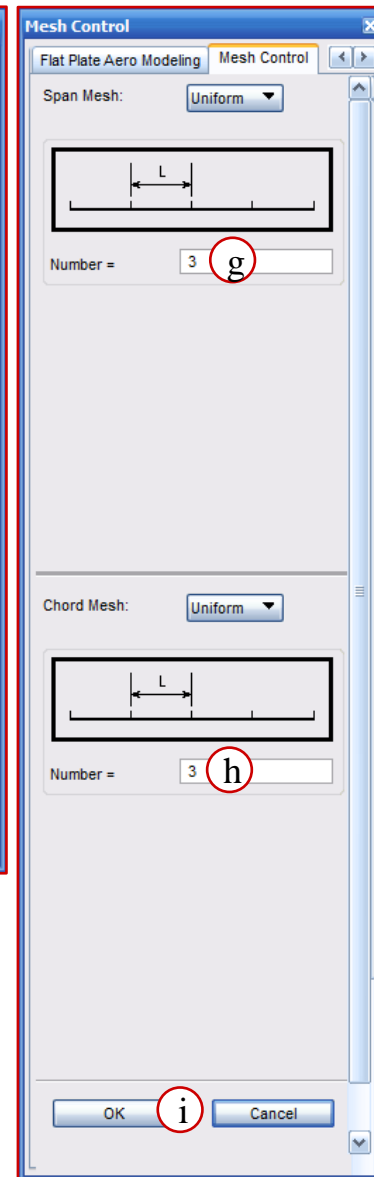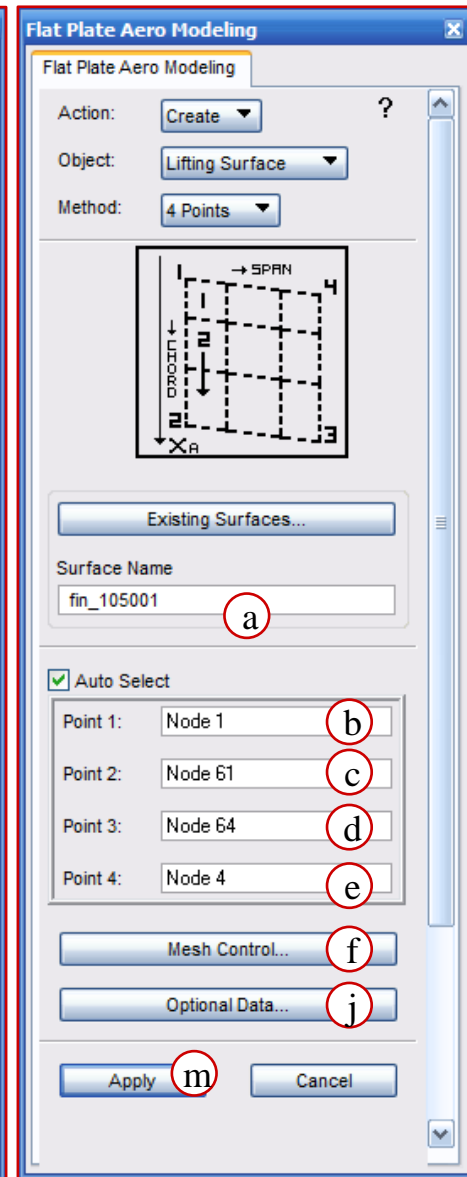

# Create Flat Panel ID- 106001

- This is Flat Aero Surface for Rudder

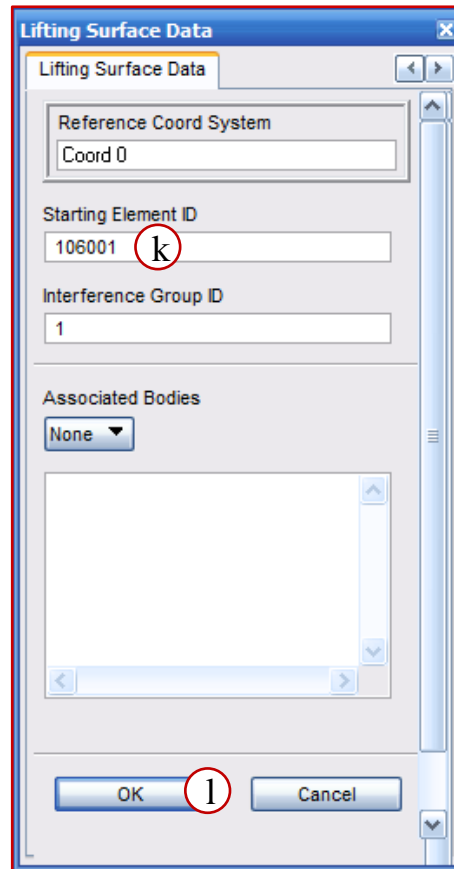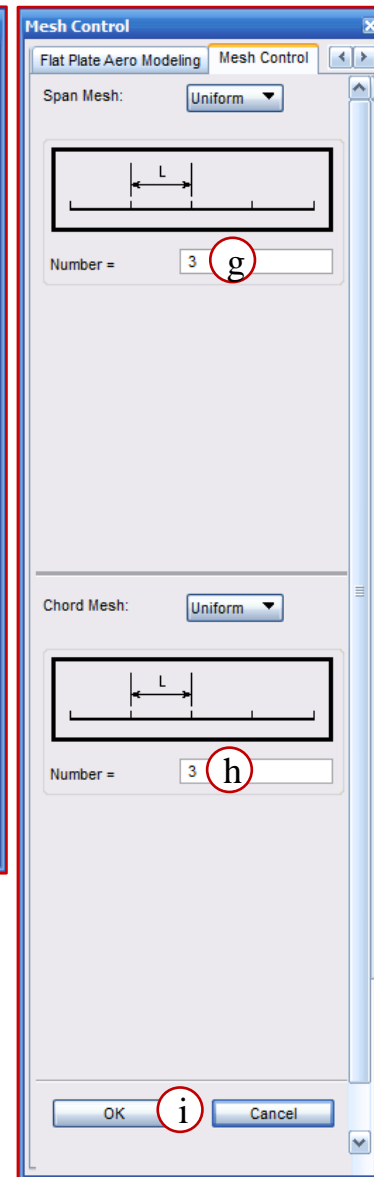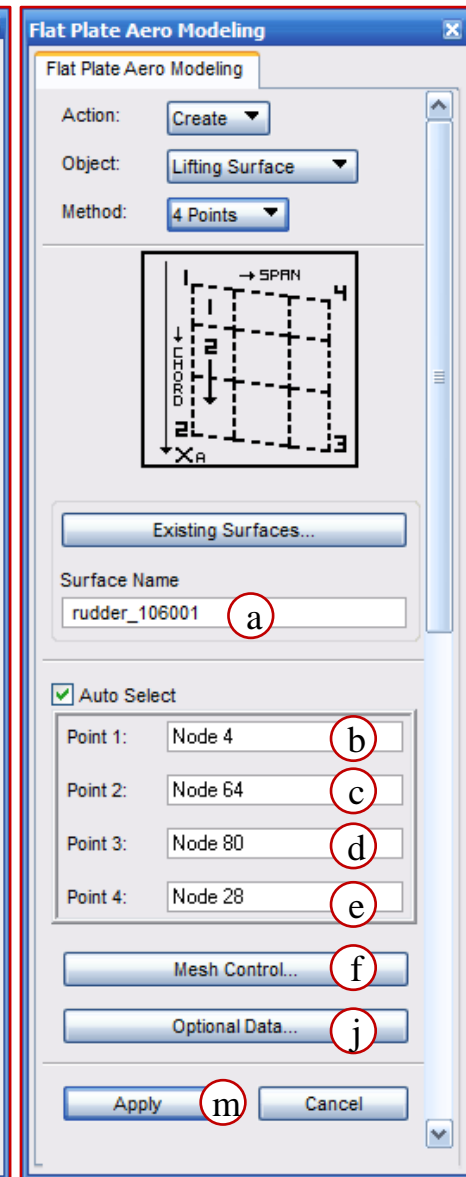

# Creating Splines

- This is the step which needs to be executed in order the connect the structural nodes to the Aero Panel Elements.

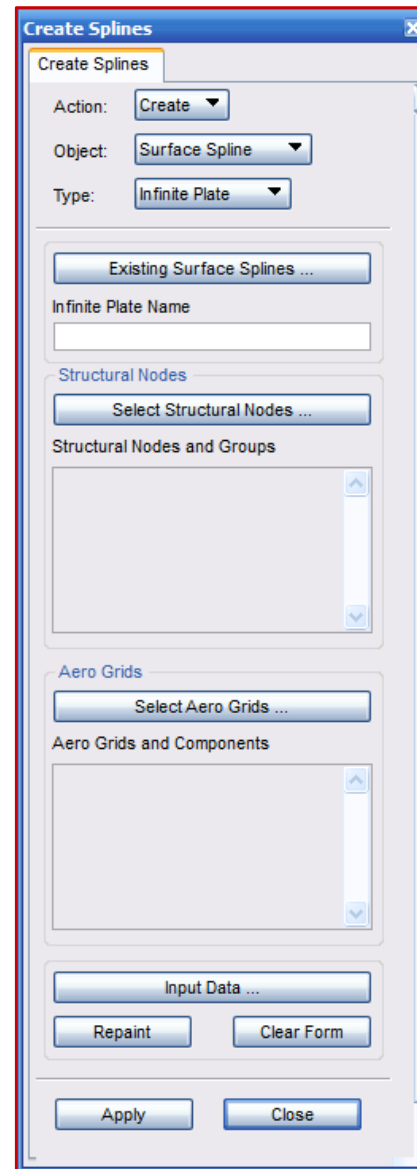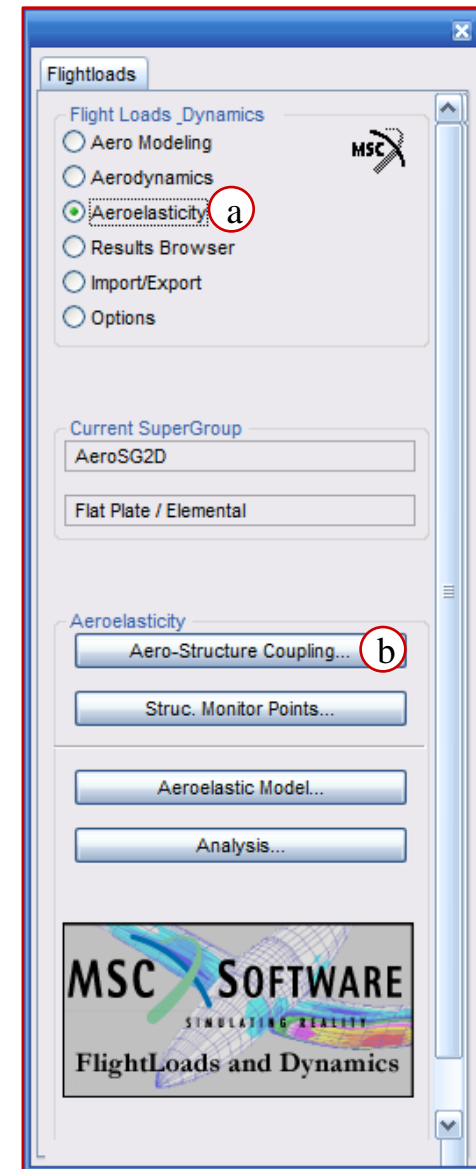

# Create Spline for Wing ID - 1

- Insert the nodes shown below in step c as a first trial. The set of nodes will be refined as the workshop proceeds.
- In step d the structural nodes participating the splining with Aero elements are selected. The structural nodes to be used will be finalized using the verify spline operation discussed further.
- In step e the Aero- panel elements to be used in splining are selected. The flat panel have been created, so the specific group needs to be selected.
- **Node 81:134 172:175 177:180 182:185 187:190 192:195 197:200**

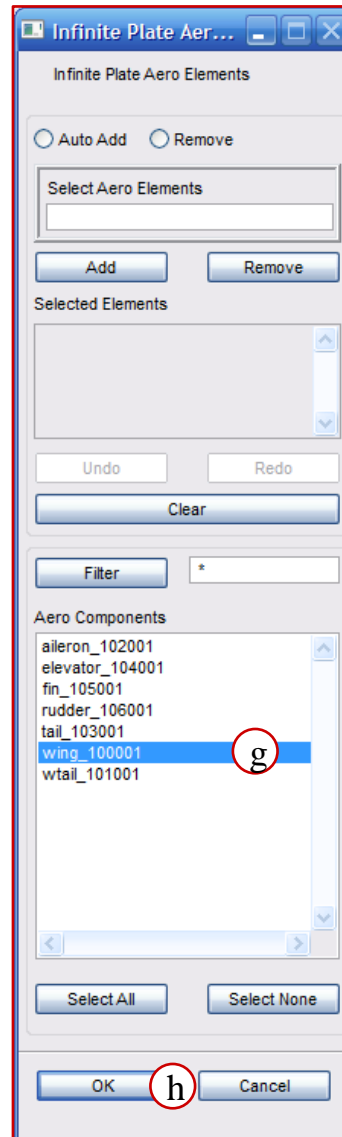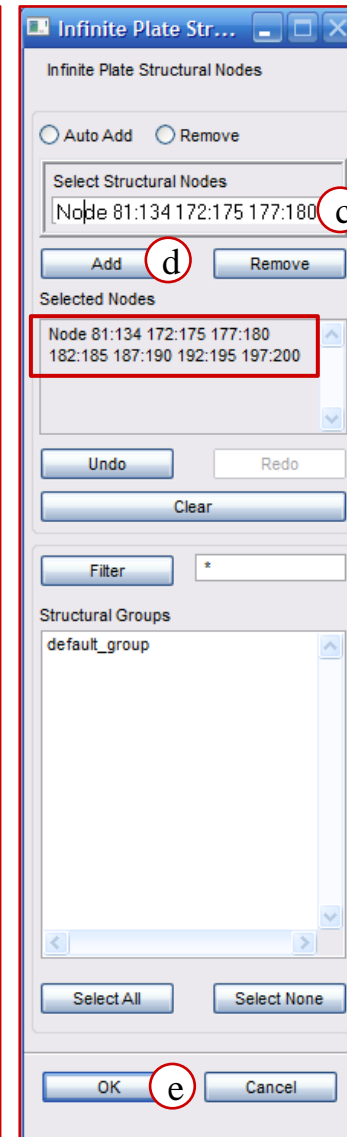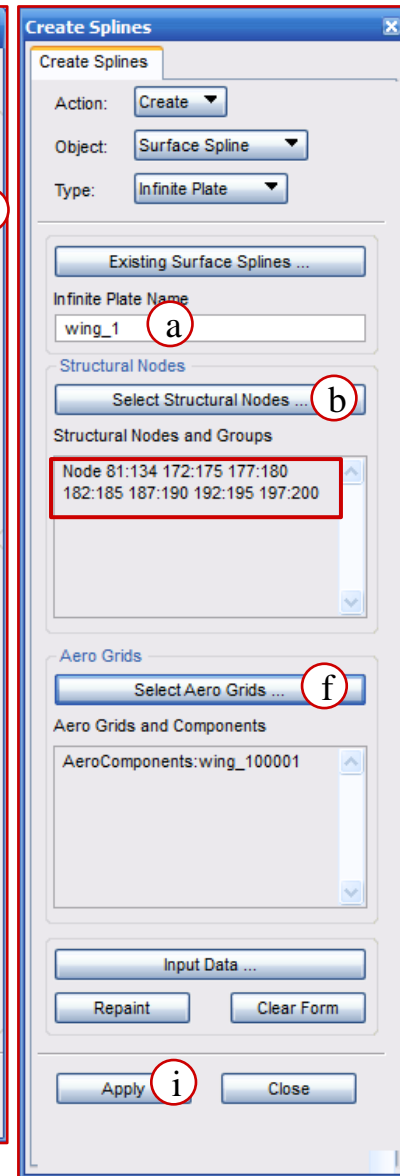

# Create Spline for WingTail ID - 2

- Insert the nodes shown below in step c as a first trial. The set of nodes will be refined as the workshop proceeds.
- In step d the structural nodes participating the splining with Aero elements are selected. The structural nodes to be used will be finalized using the verify spline operation discussed further.
- In step e the Aero- panel elements to be used in splining are selected. The flat panel have been created, so the specific group needs to be selected.
- **Node 126:134 144:170**

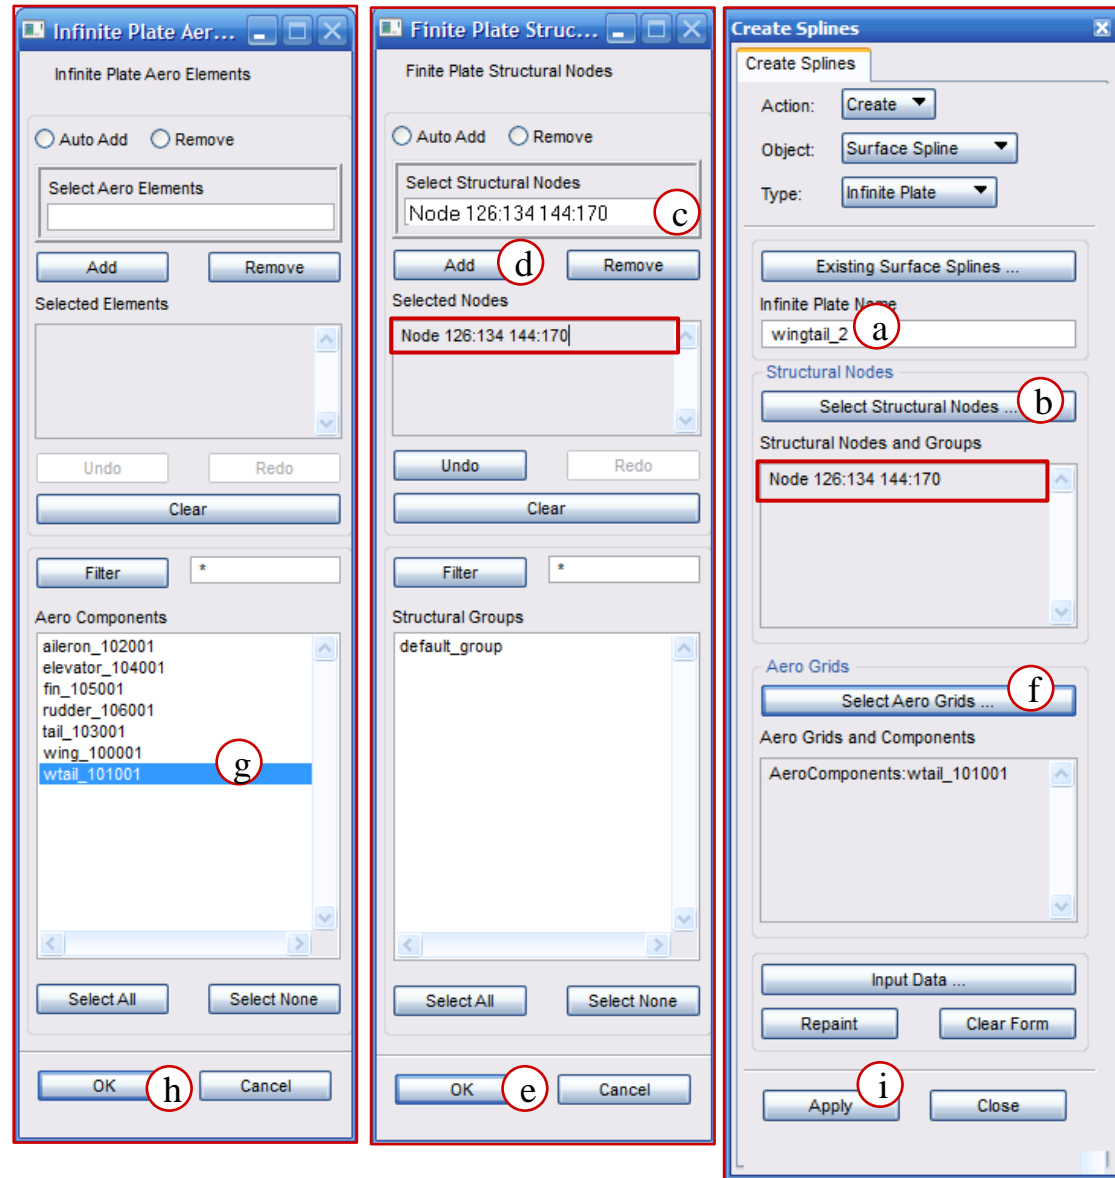

# Create Spline for Aileron ID - 3

- Insert the nodes shown below in step c as a first trial. The set of nodes will be refined as the workshop proceeds.
- In step d the structural nodes participating the splining with Aero elements are selected. The structural nodes to be used will be finalized using the verify spline operation discussed further.
- In step e the Aero- panel elements to be used in splining are selected. The flat panel have been created, so the specific group needs to be selected.
- **Node 201:220**

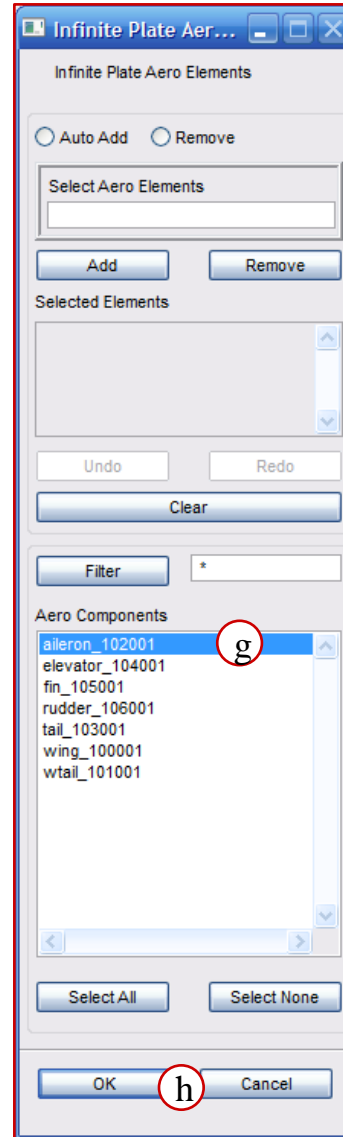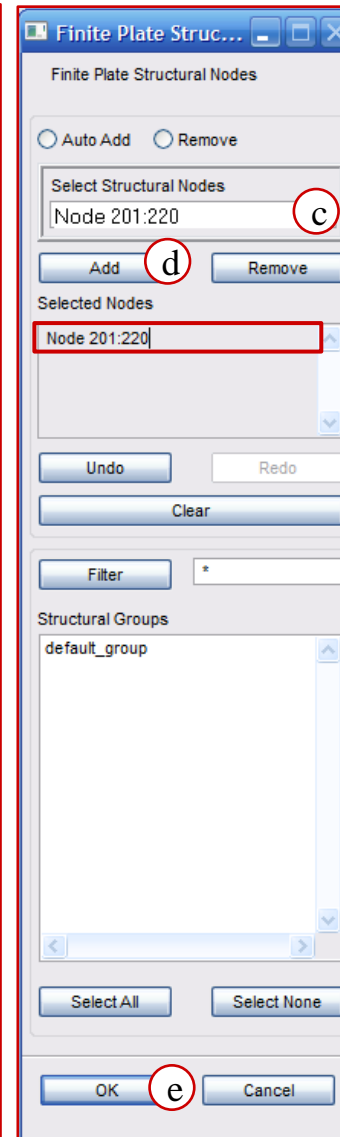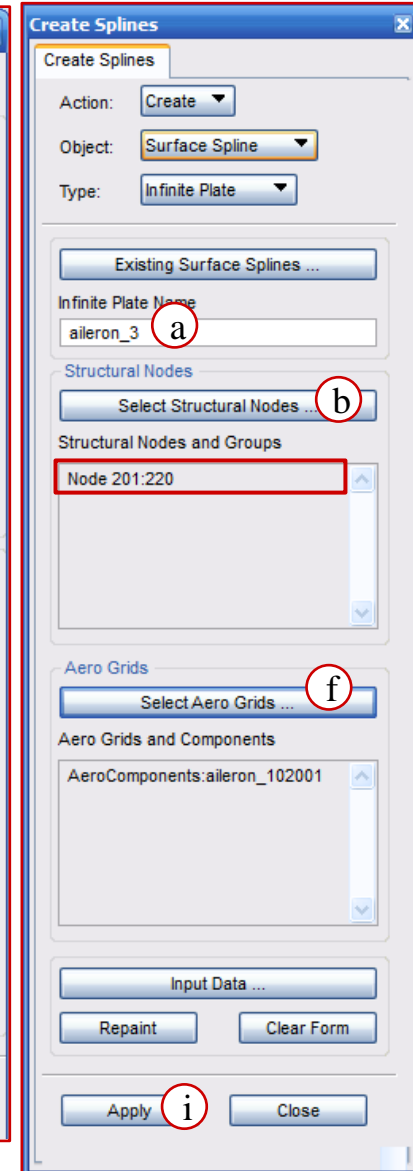

# Create Spline for Tail ID - 4

- Insert the nodes shown below in step c as a first trial. The set of nodes will be refined as the workshop proceeds.
- In step d the structural nodes participating the splining with Aero elements are selected. The structural nodes to be used will be finalized using the verify spline operation discussed further.
- In step e the Aero- panel elements to be used in splining are selected. The flat panel have been created, so the specific group needs to be selected.
- **Node 1:24**

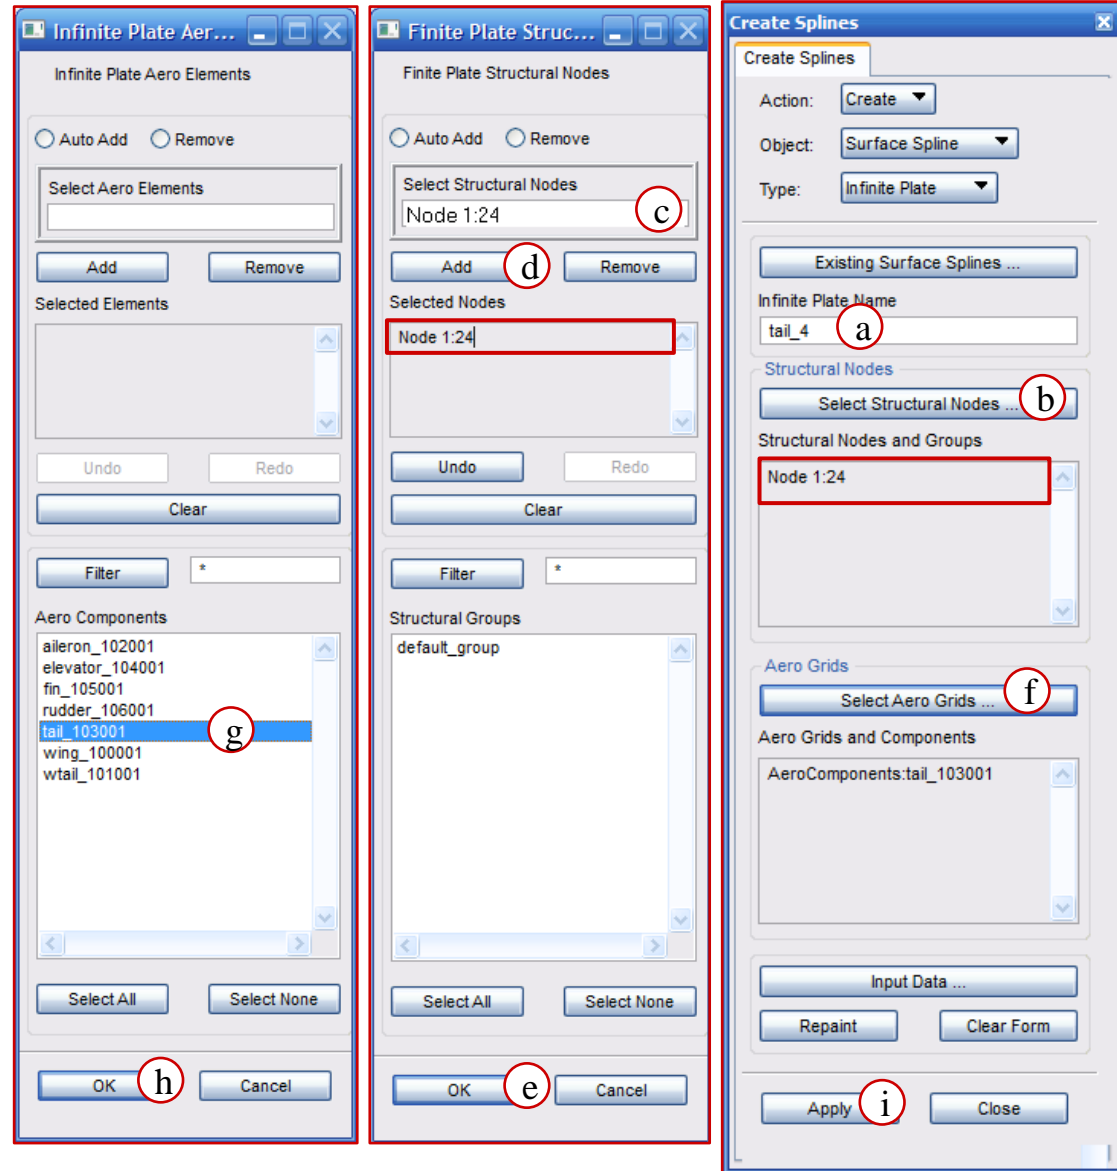

# Create Spline for Elevator ID - 5

- Insert the nodes shown below in step c as a first trial. The set of nodes will be refined as the workshop proceeds.
- In step d the structural nodes participating the splining with Aero elements are selected. The structural nodes to be used will be finalized using the verify spline operation discussed further.
- In step e the Aero- panel elements to be used in splining are selected. The flat panel have been created, so the specific group needs to be selected.
- **Node 4:24:4 26:28 30:32 34:36 38:40 42:44 46:48**

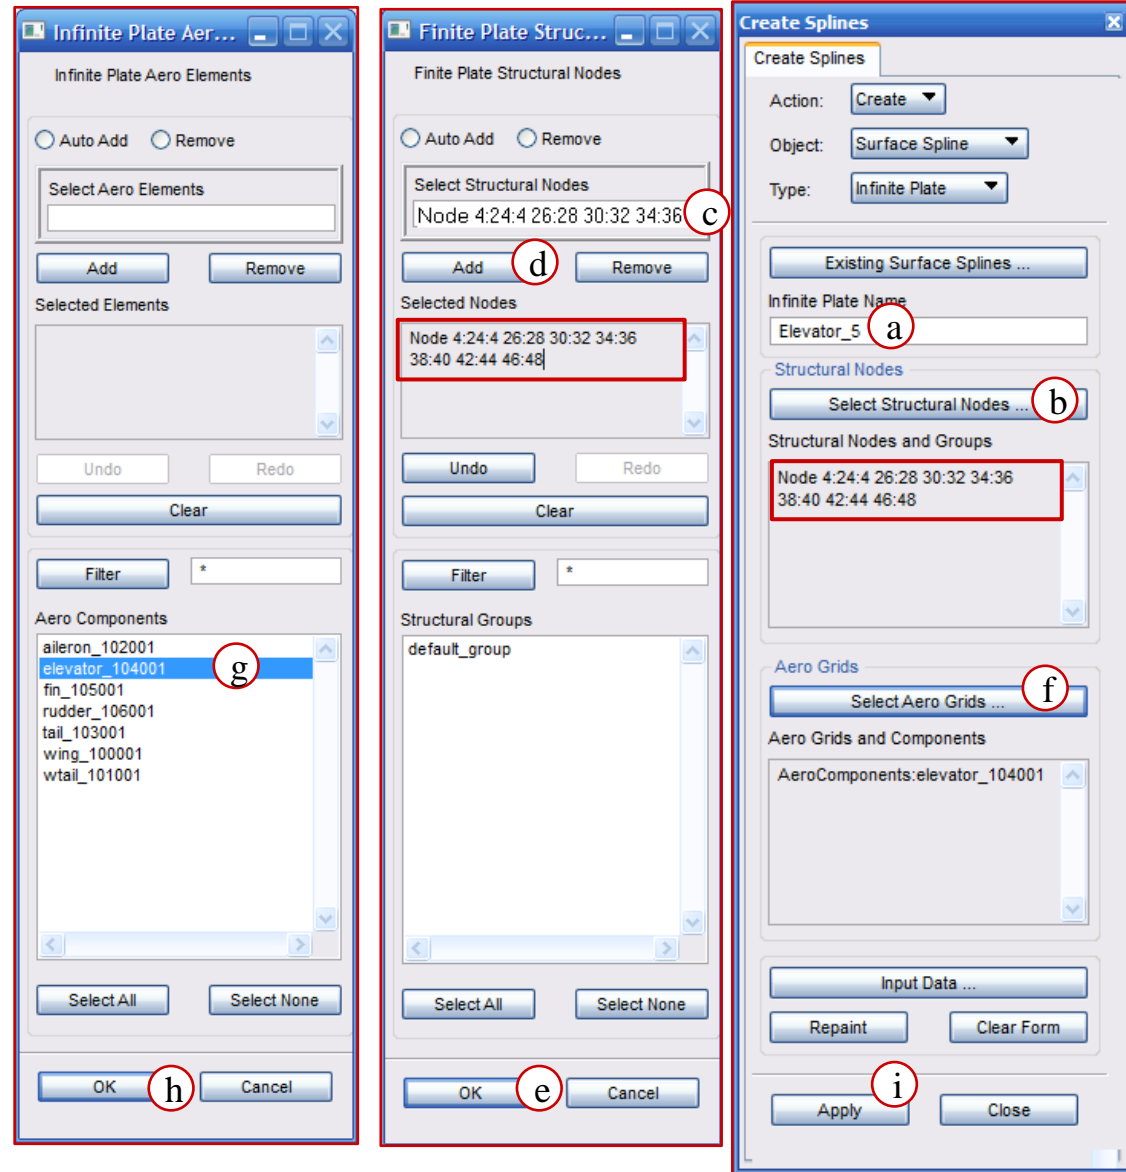

# Create Spline for Fin ID - 6

- Insert the nodes shown below in step c as a first trial. The set of nodes will be refined as the workshop proceeds.
- In step d the structural nodes participating the splining with Aero elements are selected. The structural nodes to be used will be finalized using the verify spline operation discussed further.
- In step e the Aero- panel elements to be used in splining are selected. The flat panel have been created, so the specific group needs to be selected.
- **Node 1:4 53:64**

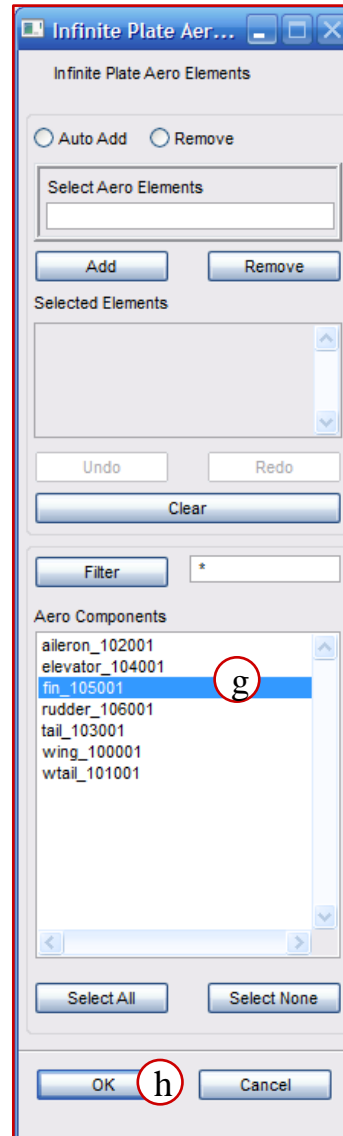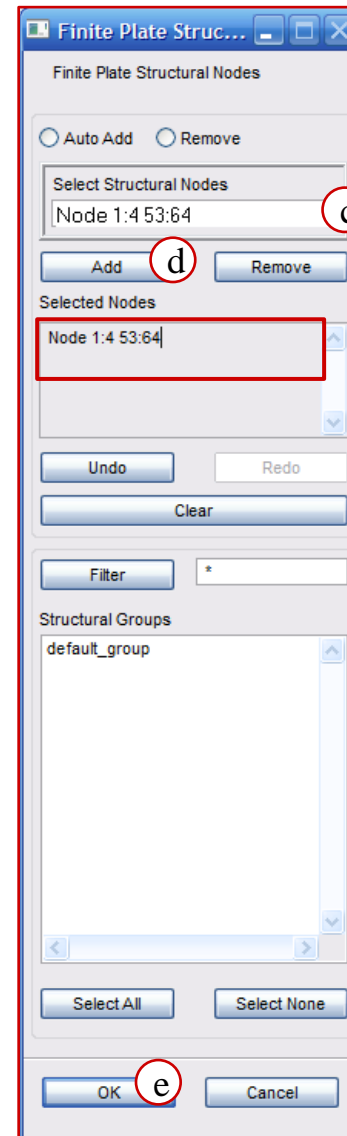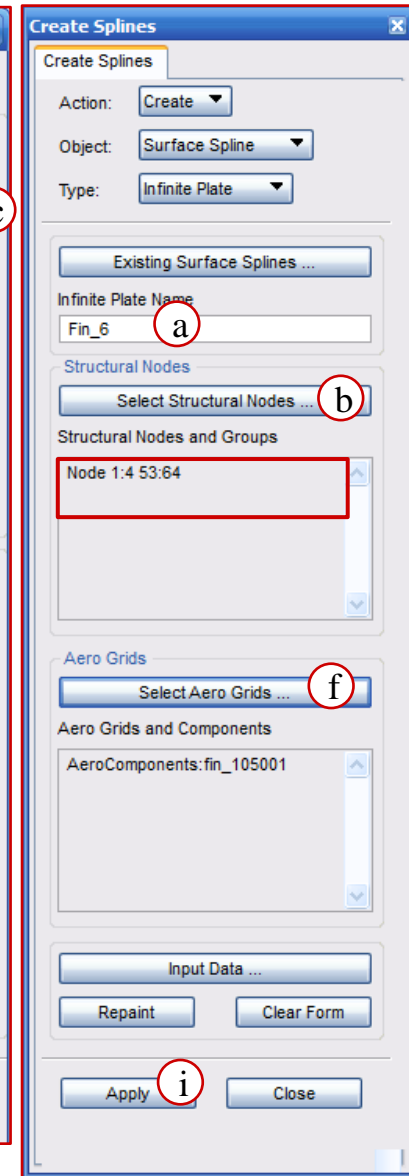

# Create Spline for Rudder ID - 7

- Insert the nodes shown below in step c as a first trial. The set of nodes will be refined as the workshop proceeds.
- In step d the structural nodes participating the splining with Aero elements are selected. The structural nodes to be used will be finalized using the verify spline operation discussed further.
- In step e the Aero- panel elements to be used in splining are selected. The flat panel have been created, so the specific group needs to be selected.
- **Node 4 26:28 56:64:4 70:72 74:76 78:80**

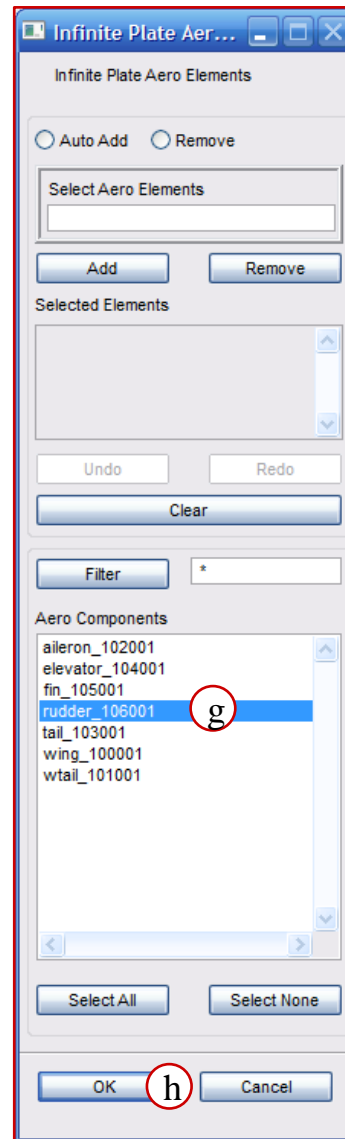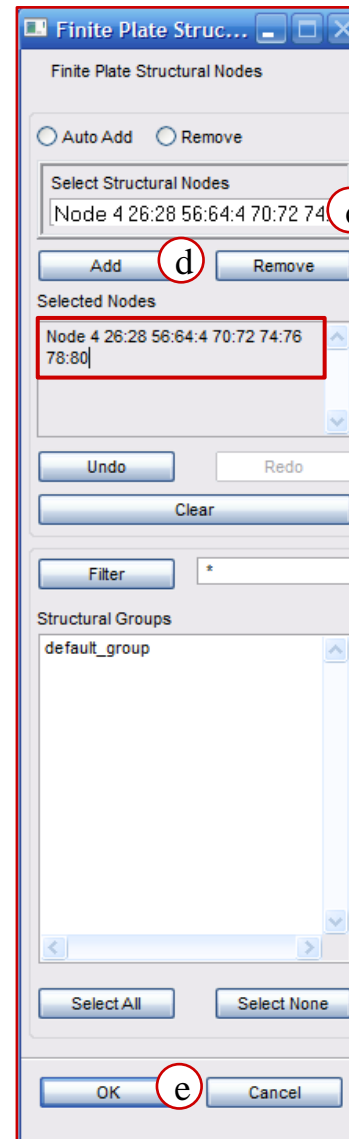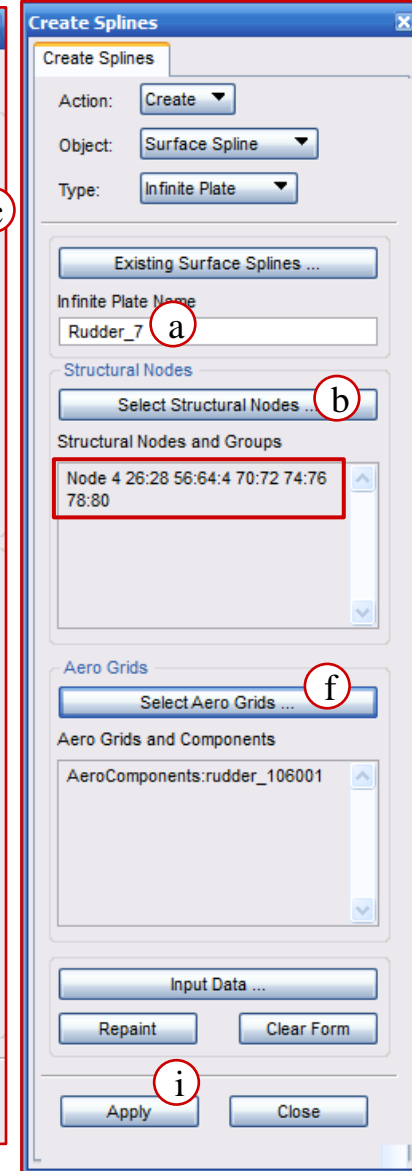

# Verify Spline

- **Animate**

- Aeroelasticity click Aero-Structural Coupling
- Select Splines
- Auto Select Splines
- Select from available splines and pick the first non-rigid mode
- Click Apply to see the animation

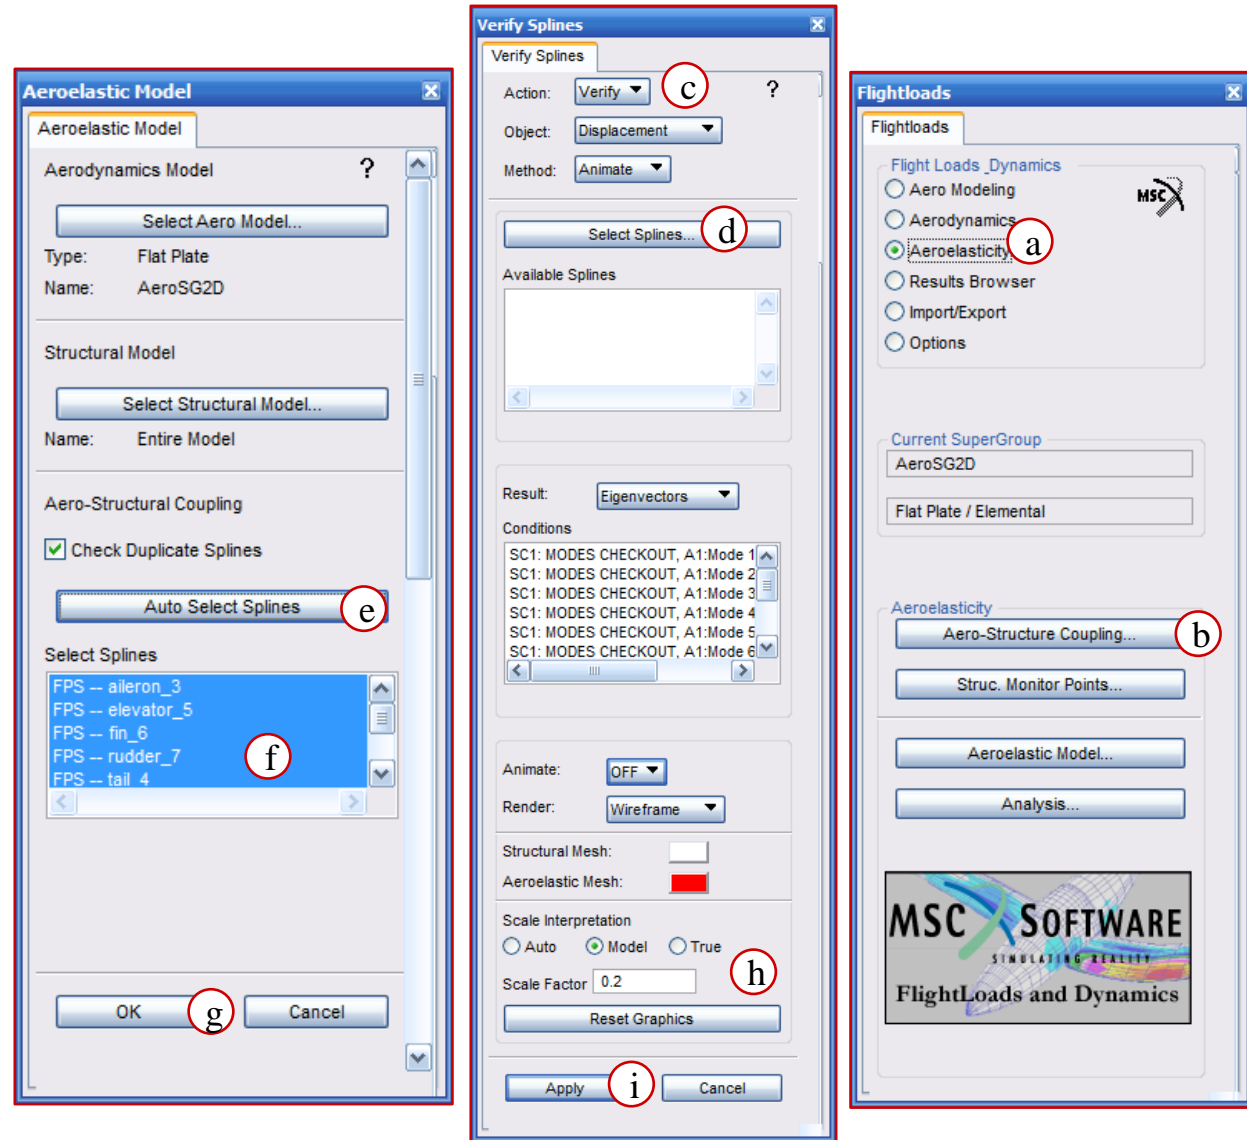

# Verify Spline → Results

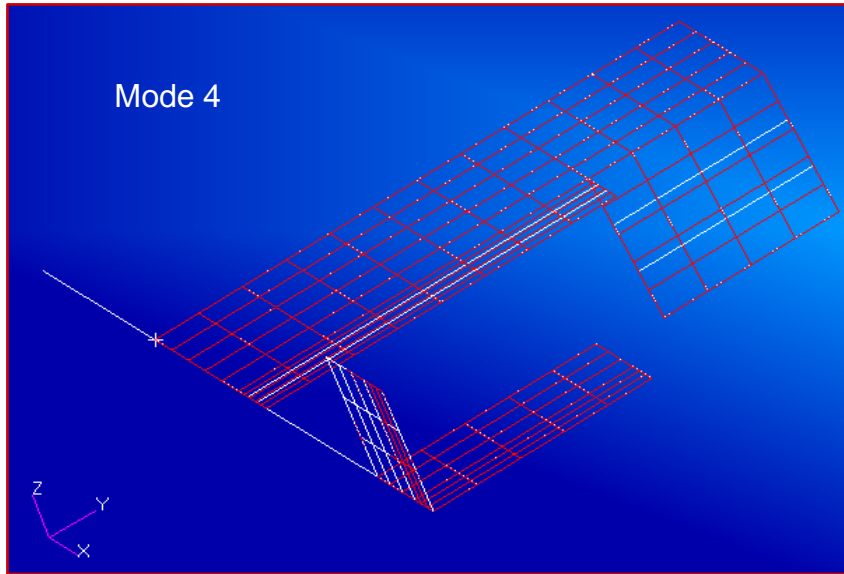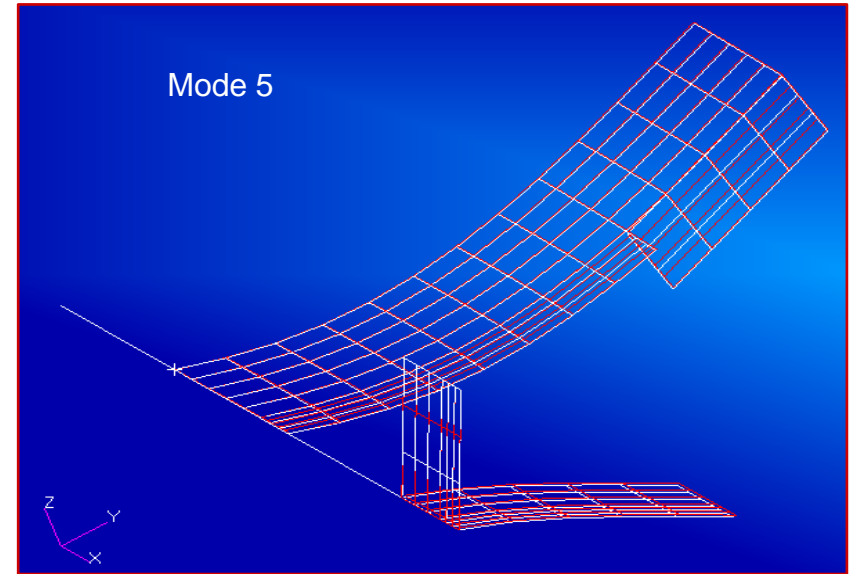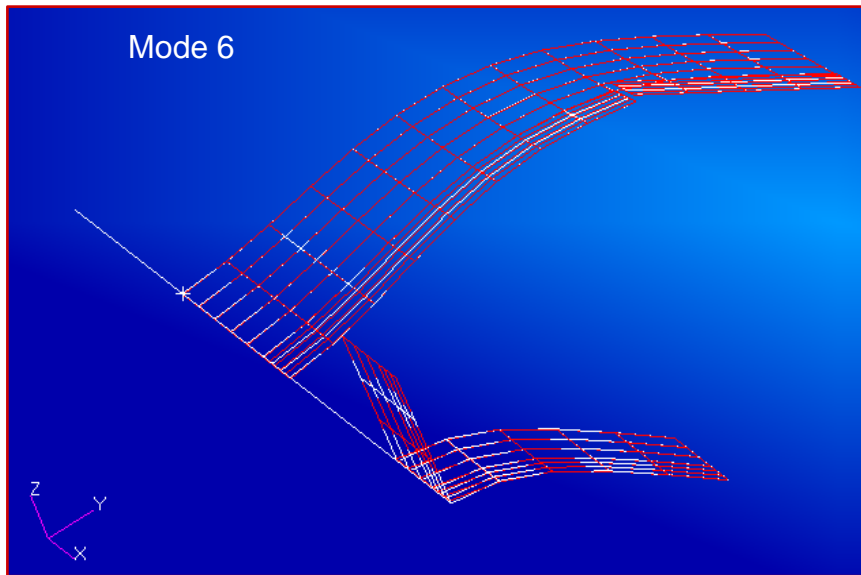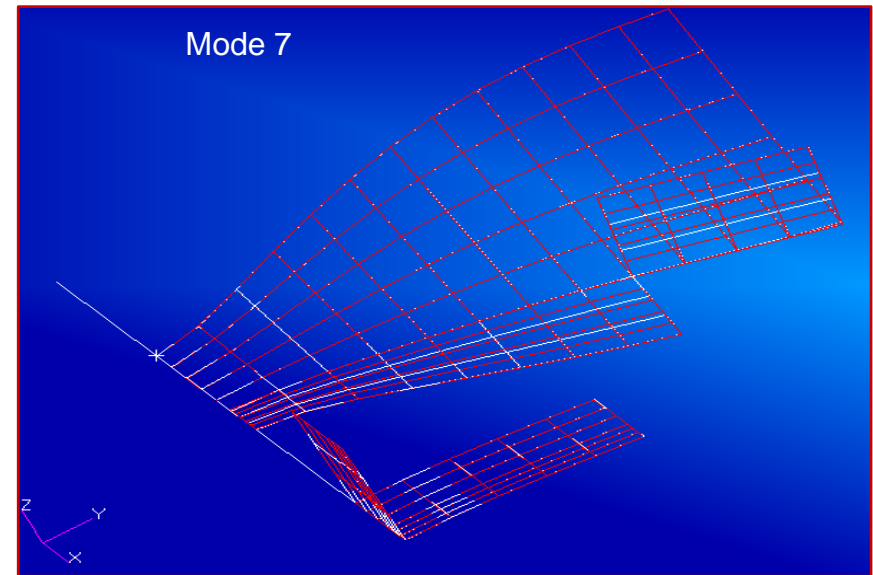

# Define Control Surface for Aileron

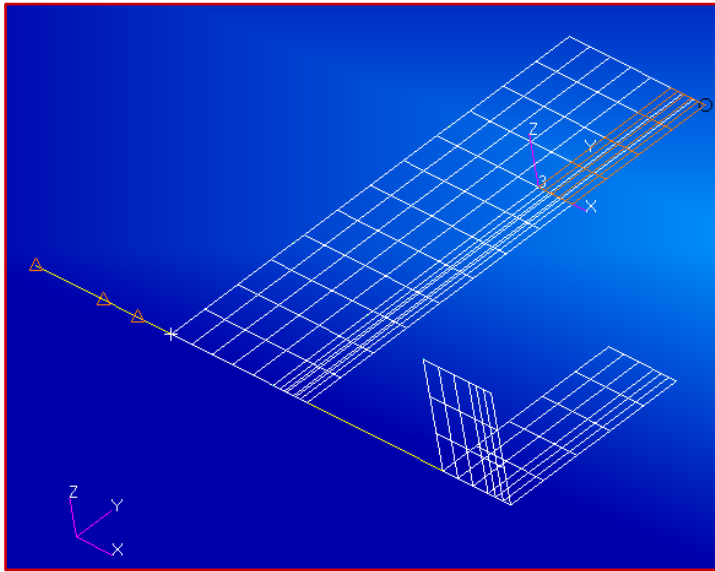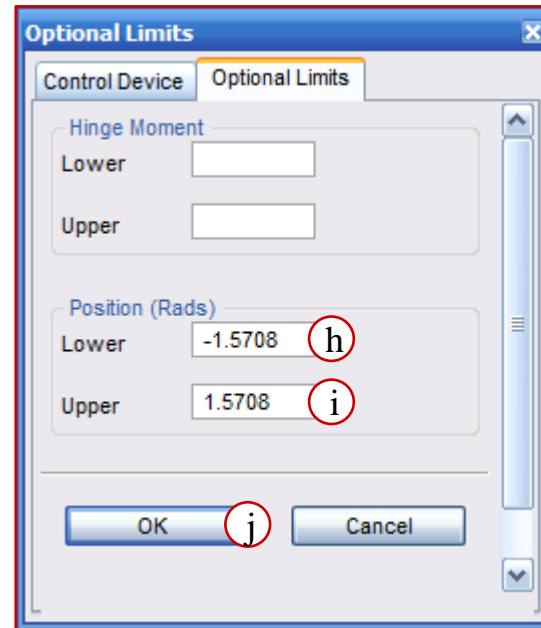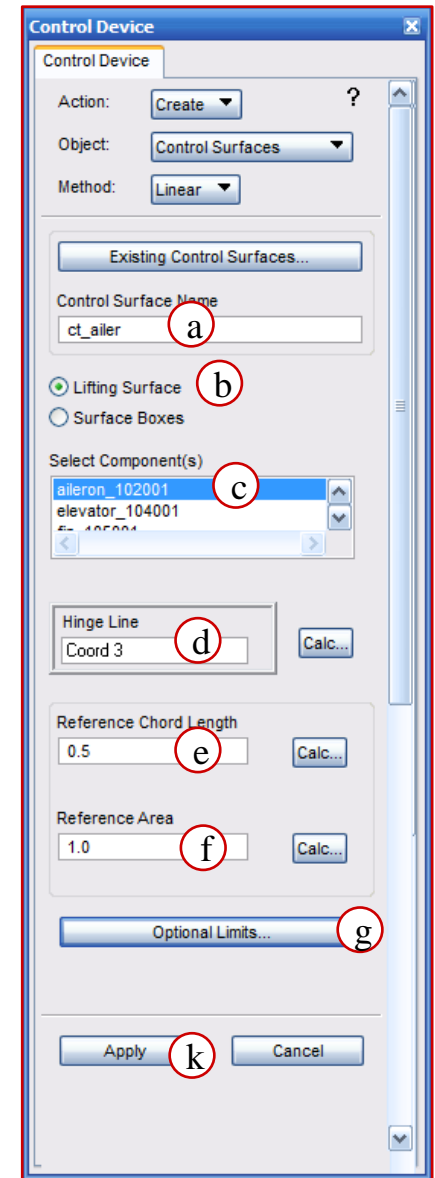

# Define Global Data for Aircraft

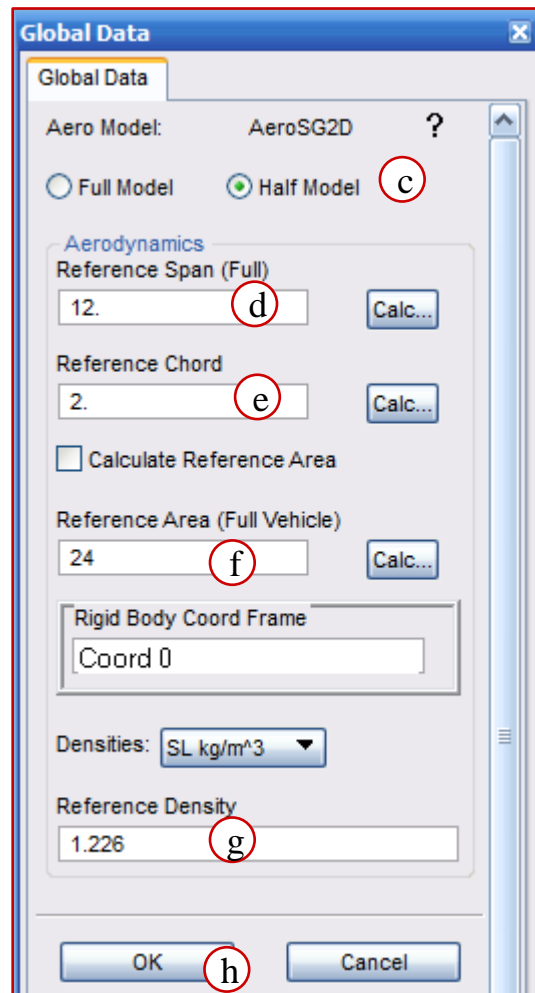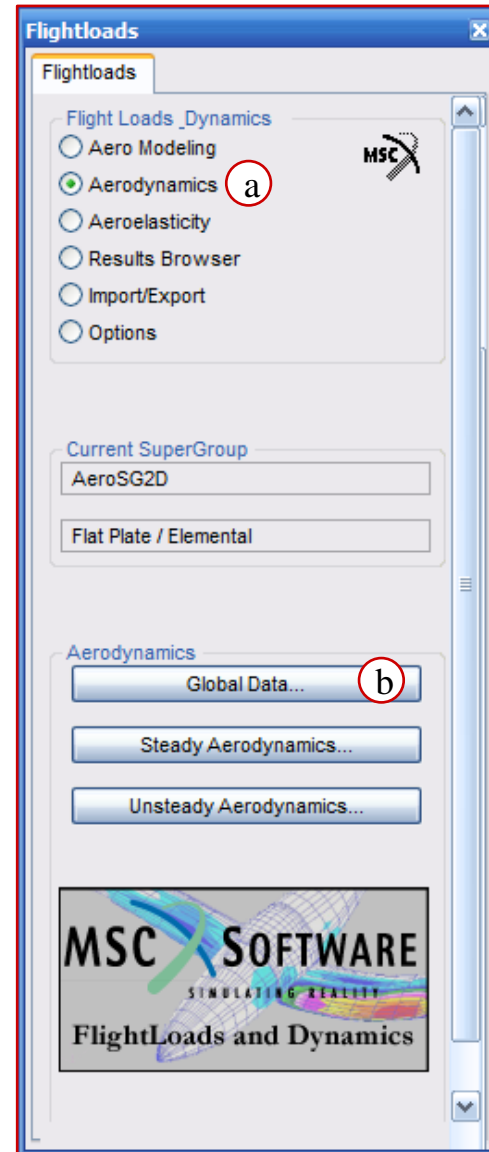

# Define Model Parameters

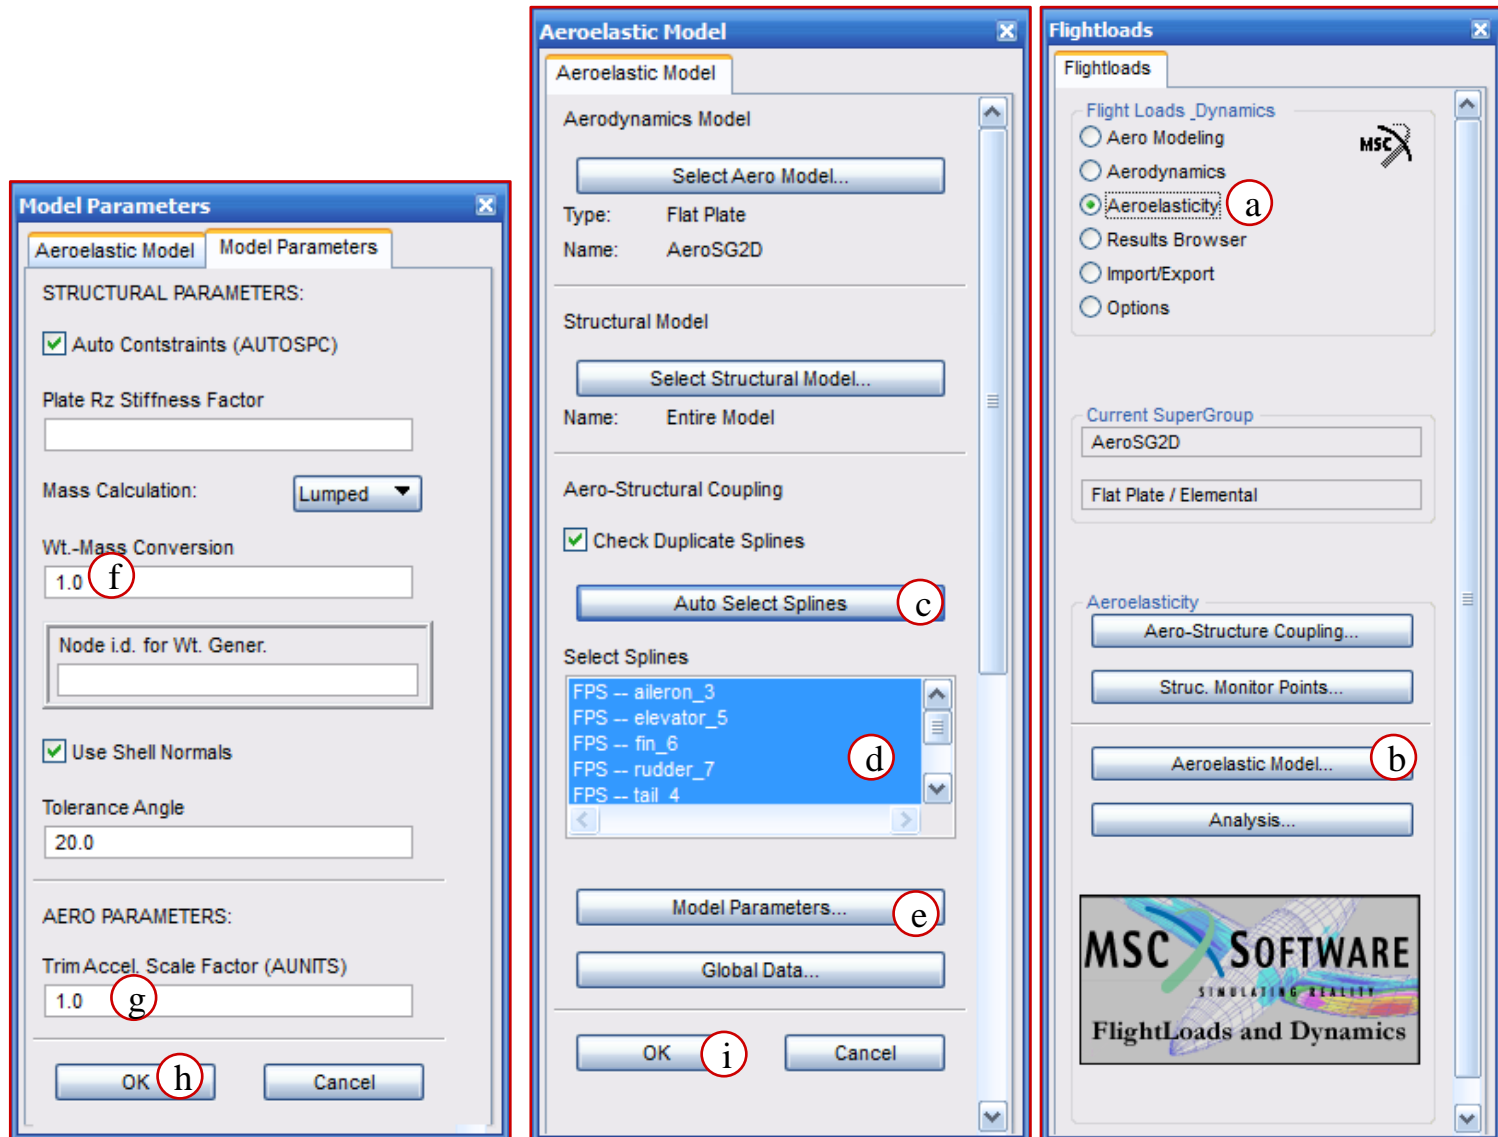

# Add Structural BC to study Roll motion

- Switch to Structural Preference.
- Add constraint with 2<sup>nd</sup> and 6<sup>th</sup> dof fixed at node 99. Named it as spcfix. Now model is free in other 4 dof, so the rolling motion of model can be studied.

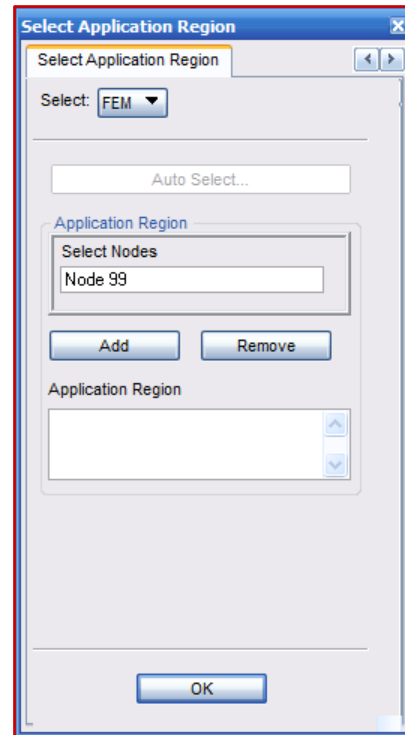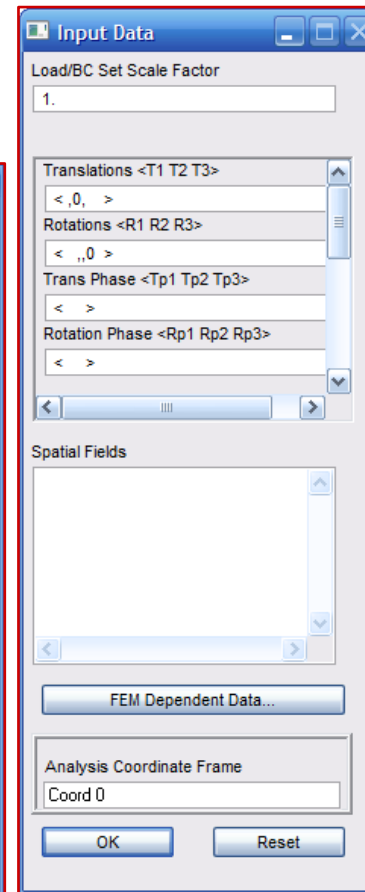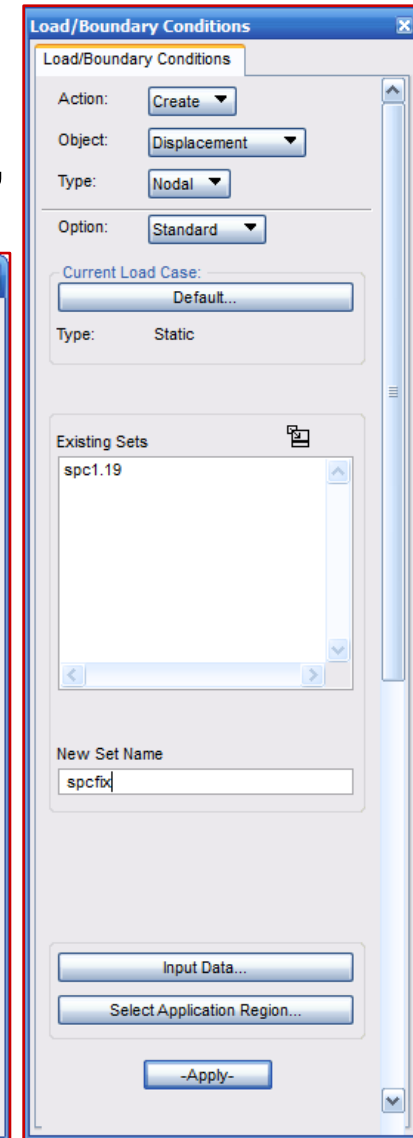

# Create Loadcase

- Create Default Load case with Symmetry BC and Constraint in 26 Dof's at Node 99.

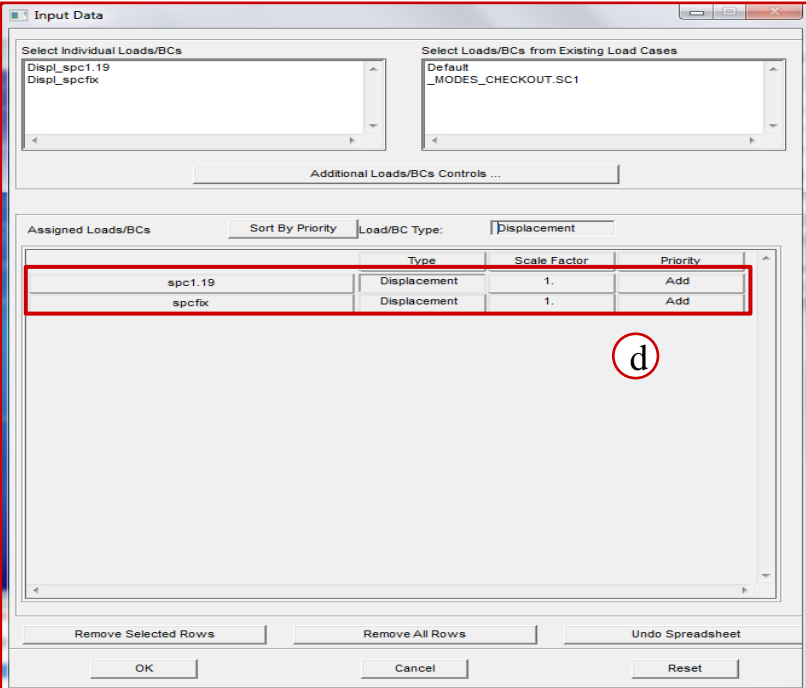

The 'Input Data' dialog box is shown. It has two list boxes at the top: 'Select Individual Loads/BCs' containing 'Disp\_spc1.19' and 'Disp\_spcfx', and 'Select Loads/BCs from Existing Load Cases' containing 'Default' and '\_MODES\_CHECKOUT.SC1'. Below these is an 'Additional Loads/BCs Controls ...' button. The main section is 'Assigned Loads/BCs' with a table. The table has columns: 'Type', 'Scale Factor', and 'Priority'. Two rows are visible: 'spc1.19' with 'Displacement' type, '1.' scale factor, and 'Add' priority; and 'spcfx' with 'Displacement' type, '1.' scale factor, and 'Add' priority. At the bottom are buttons: 'Remove Selected Rows', 'Remove All Rows', 'Undo Spreadsheet', 'OK', 'Cancel', and 'Reset'.

| Type         | Scale Factor | Priority |
|--------------|--------------|----------|
| Displacement | 1.           | Add      |
| Displacement | 1.           | Add      |

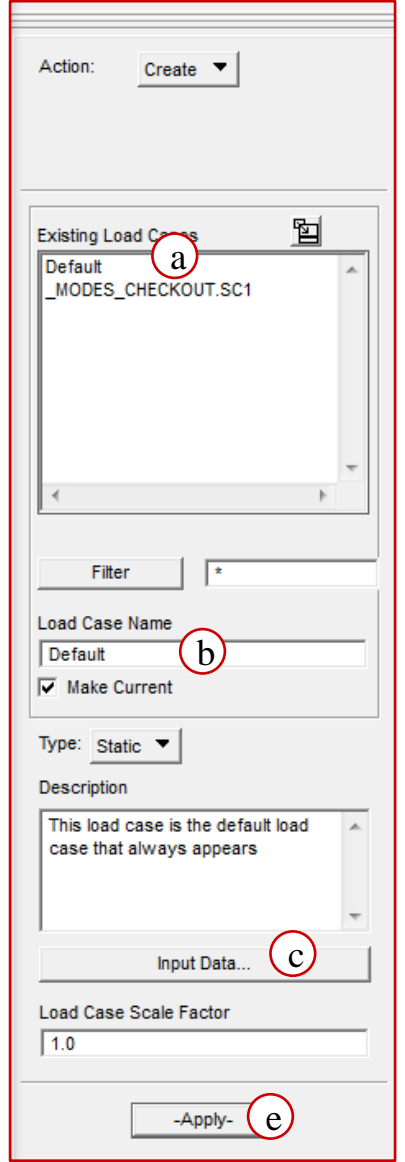

The 'Load Case' dialog box is shown. It has an 'Action:' dropdown set to 'Create'. Below is a list box 'Existing Load Cases' containing 'Default' and '\_MODES\_CHECKOUT.SC1'. There is a 'Filter' button and a text field with an asterisk. The 'Load Case Name' section has a text field with 'Default' and a checked 'Make Current' checkbox. The 'Type:' dropdown is set to 'Static'. The 'Description' text area contains the text: 'This load case is the default load case that always appears'. Below this is an 'Input Data...' button. The 'Load Case Scale Factor' section has a text field with '1.0'. At the bottom is a '-Apply-' button.

# Setup For Trim Case

- Switch back to Aero elasticity Preference

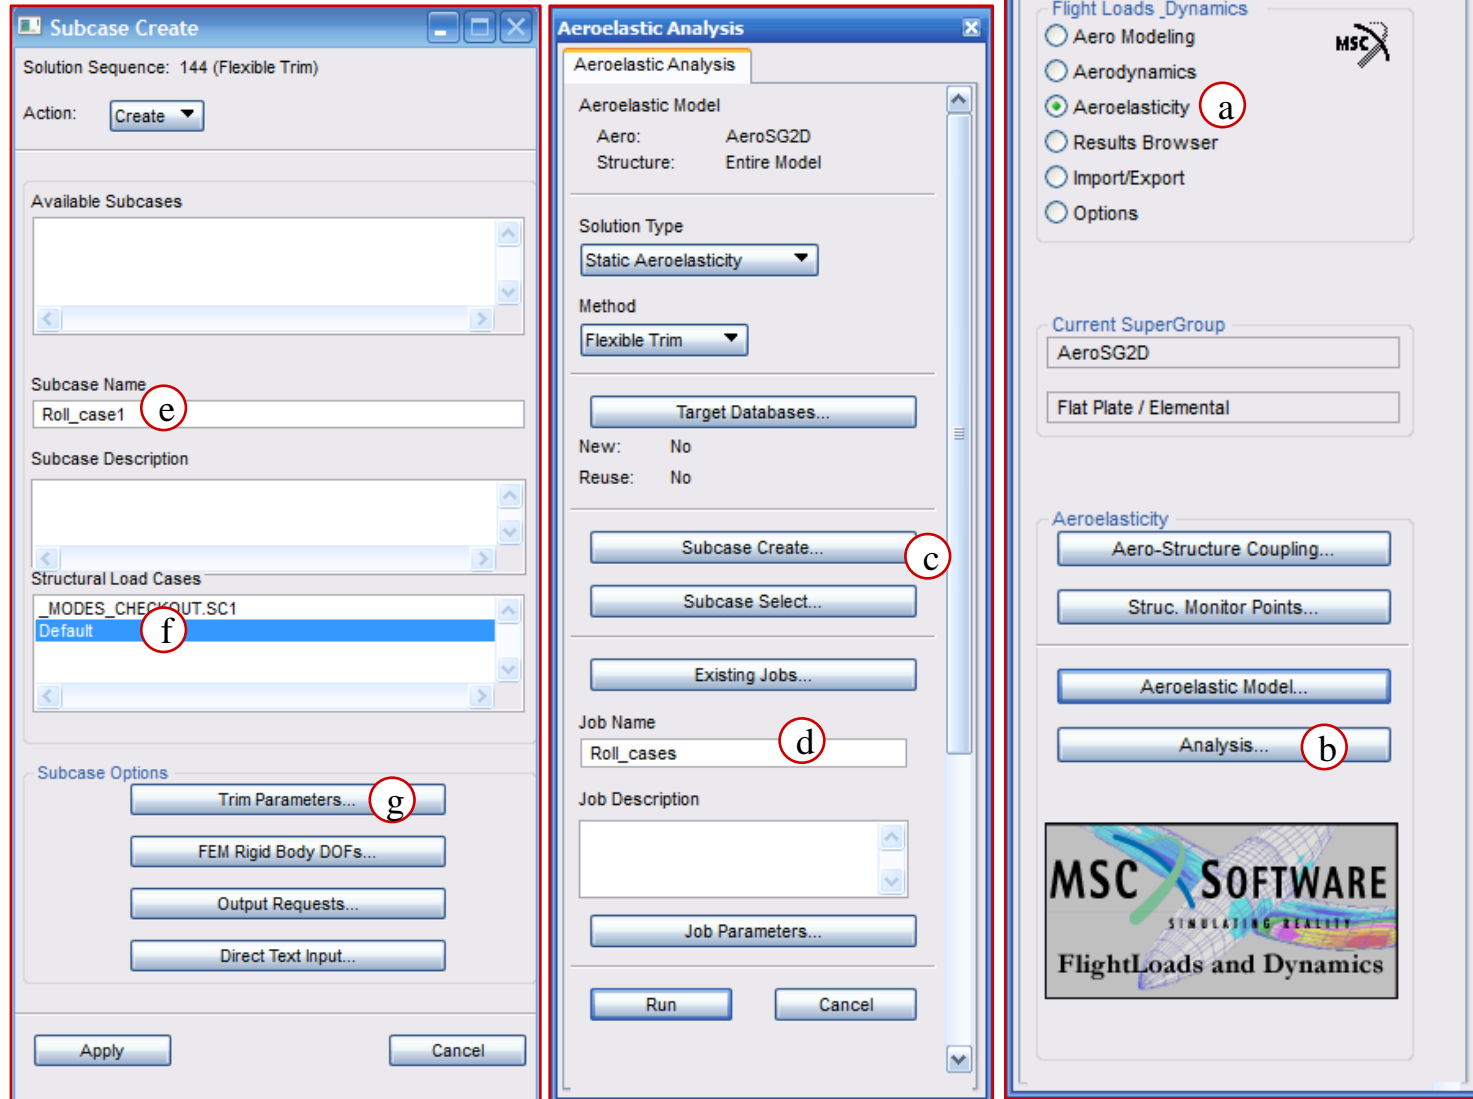

# Job Setup for Roll Trim Analysis (Cont.)

- This procedure will write out the TRIM entry into the Nastran input deck
- Steady roll:
  - Aileron deflection:  $15^\circ$
  - Roll rate to be determined

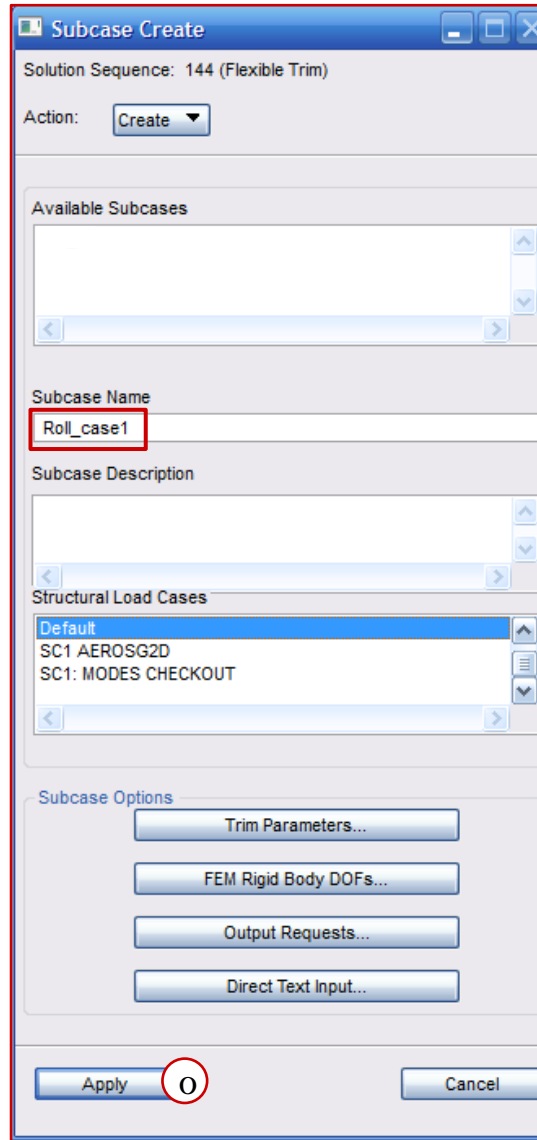

The Subcase Create dialog box is shown with the following settings:

- Solution Sequence: 144 (Flexible Trim)
- Action: Create
- Available Subcases: (empty list)
- Subcase Name: Roll\_case1
- Subcase Description: (empty text area)
- Structural Load Cases: Default, SC1 AEROSG2D, SC1: MODES CHECKOUT
- Subcase Options: Trim Parameters..., FEM Rigid Body DOFs..., Output Requests..., Direct Text Input...
- Buttons: Apply, Cancel

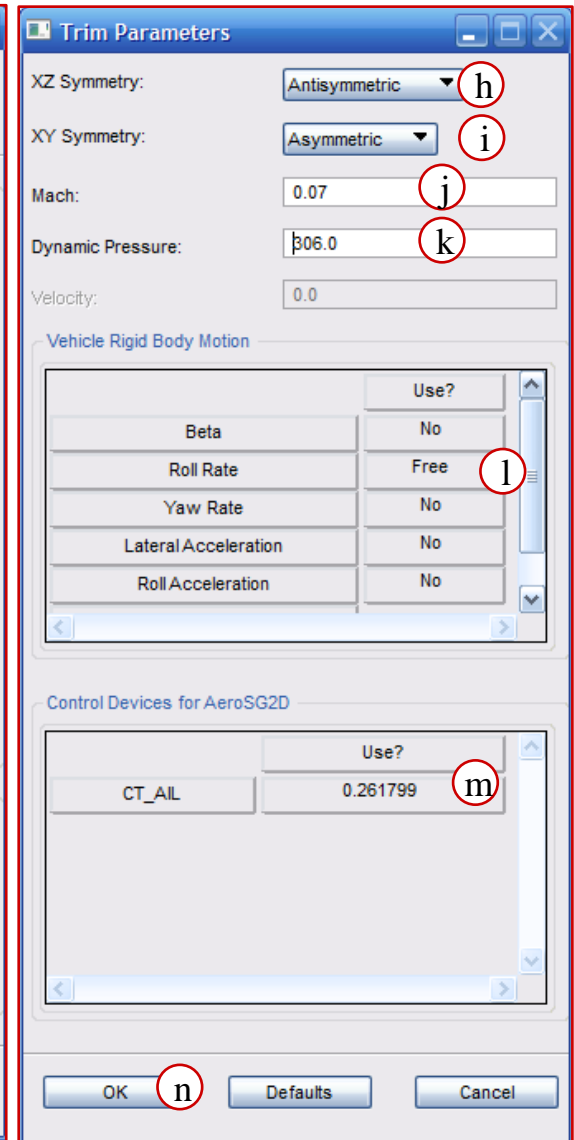

The Trim Parameters dialog box is shown with the following settings:

- XZ Symmetry: Antisymmetric
- XY Symmetry: Asymmetric
- Mach: 0.07
- Dynamic Pressure: 306.0
- Velocity: 0.0
- Vehicle Rigid Body Motion:

|                      | Use? |
|----------------------|------|
| Beta                 | No   |
| Roll Rate            | Free |
| Yaw Rate             | No   |
| Lateral Acceleration | No   |
| Roll Acceleration    | No   |
- Control Devices for AeroSG2D:

|        | Use?     |
|--------|----------|
| CT_AIL | 0.261799 |
- Buttons: OK, Defaults, Cancel

# Define FEM Rigid Body DOFs

- This will write the SUPORT1 entry in the Case control and Begin Bulk Section

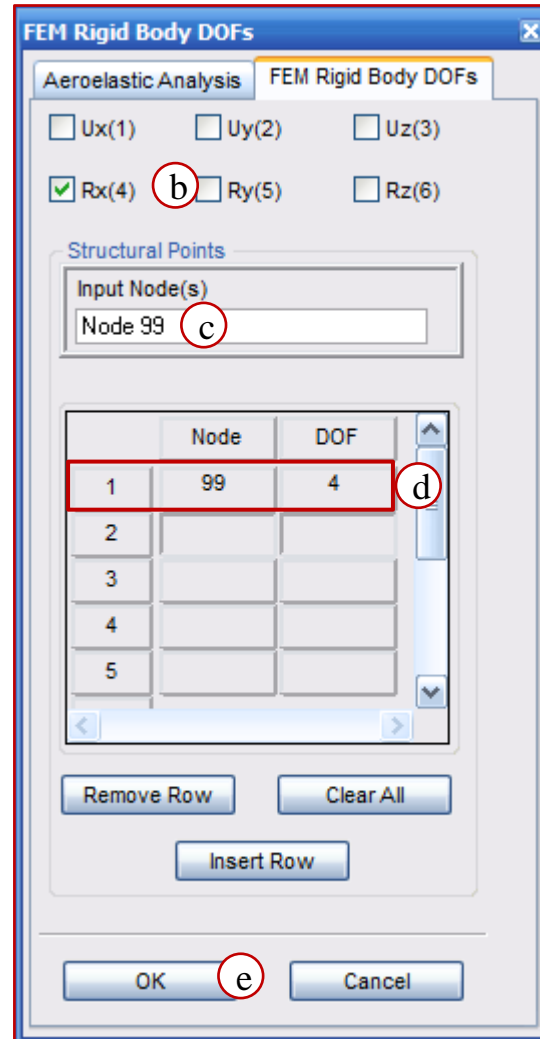

The dialog box is titled "FEM Rigid Body DOFs" and has two tabs: "Aeroelastic Analysis" and "FEM Rigid Body DOFs". The "FEM Rigid Body DOFs" tab is active. It contains several checkboxes for degrees of freedom: Ux(1), Uy(2), Uz(3), Rx(4), Ry(5), and Rz(6). The Rx(4) checkbox is checked and circled with a red 'b'. Below these is a section titled "Structural Points" with an "Input Node(s)" text box containing "Node 99" and circled with a red 'c'. Below that is a table with columns "Node" and "DOF". The first row is highlighted with a red box and circled with a red 'd', showing "1" in the "Node" column and "4" in the "DOF" column. Below the table are buttons for "Remove Row", "Clear All", and "Insert Row". At the bottom are "OK" and "Cancel" buttons, with the "OK" button circled with a red 'e'.

|   | Node | DOF |
|---|------|-----|
| 1 | 99   | 4   |
| 2 |      |     |
| 3 |      |     |
| 4 |      |     |
| 5 |      |     |

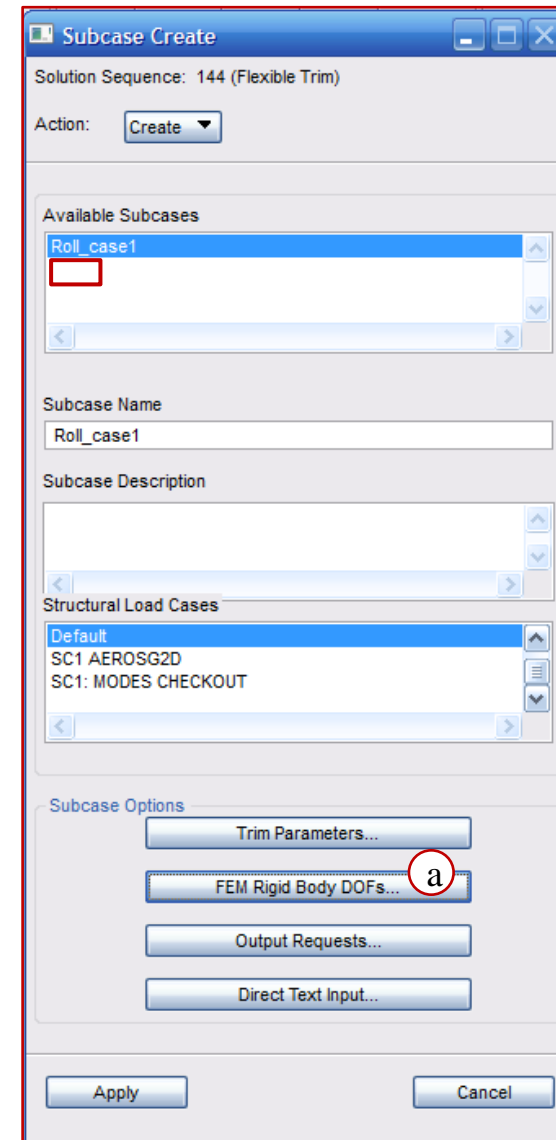

The dialog box is titled "Subcase Create" and shows the "Solution Sequence: 144 (Flexible Trim)". The "Action:" dropdown is set to "Create". It has sections for "Available Subcases" (showing "Roll\_case1" selected), "Subcase Name" (set to "Roll\_case1"), "Subcase Description", "Structural Load Cases" (showing "Default", "SC1 AEROSG2D", and "SC1: MODES CHECKOUT"), and "Subcase Options". In the "Subcase Options" section, the "FEM Rigid Body DOFs..." button is circled with a red 'a'. At the bottom are "Apply" and "Cancel" buttons.

# Table of Remaining 6 → Roll trim cases

- The same procedure as shown for Roll\_case1 needs to be repeated for 6 different mach no's and Dynamic pressure as shown in Table below.

- **Steady roll:**

- Aileron deflection: 15°
- Roll rate to be determined

- **Investigate roll rate at varying speeds**

- Roll Rate is derived from Trim Variable  
ROLL

$$\text{ROLL} = \frac{\text{roll rate} \cdot \text{semi span}}{\text{Velocity}}$$

| Mach No | Q        |
|---------|----------|
| 0.07    | 306.01   |
| 0.13    | 1224.05  |
| 0.20    | 2754.11  |
| 0.26    | 4896.20  |
| 0.33    | 7650.31  |
| 0.39    | 11016.44 |
| 0.46    | 14994.60 |

# Roll Results from F06 file for Subcase 1

3

SUBCASE 1

AEROSTATIC DATA RECOVERY OUTPUT TABLES  
 CONFIGURATION = AEROSG2D XY-SYMMETRY = ASYMMETRIC XZ-SYMMETRY = ANTISYMMETRIC  
 MACH = 7.000000E-02 Q = 3.060000E+02  
 CHORD = 2.0000E+00 SPAN = 1.2000E+01 AREA = 1.2000E+01

TRIM ALGORITHM USED: LINEAR TRIM SOLUTION WITHOUT REDUNDANT CONTROL SURFACES.

## AEROELASTIC TRIM VARIABLES

| ID | LABEL     | TYPE            | TRIM STATUS | VALUE OF UX  |                |
|----|-----------|-----------------|-------------|--------------|----------------|
|    | INTERCEPT | RIGID BODY      | FIXED       | 1.000000E+00 |                |
| 1  | CT_AIL    | CONTROL SURFACE | FIXED       | 2.617990E-01 | RADIANS        |
| 1  | ANGLEA    | RIGID BODY      | FIXED       | 0.000000E+00 | RADIANS        |
| 2  | SIDES     | RIGID BODY      | FIXED       | 0.000000E+00 | RADIANS        |
| 3  | ROLL      | RIGID BODY      | FREE        | 8.677795E-02 | NONDIMEN. RATE |
| 4  | PITCH     | RIGID BODY      | FIXED       | 0.000000E+00 | NONDIMEN. RATE |
| 5  | YAW       | RIGID BODY      | FIXED       | 0.000000E+00 | NONDIMEN. RATE |
| 6  | URDD1     | RIGID BODY      | FIXED       | 0.000000E+00 | LENGTH/S/S     |
| 7  | URDD2     | RIGID BODY      | FIXED       | 0.000000E+00 | LENGTH/S/S     |
| 8  | URDD3     | RIGID BODY      | FIXED       | 0.000000E+00 | LENGTH/S/S     |
| 9  | URDD4     | RIGID BODY      | FIXED       | 0.000000E+00 | RADIANS/S/S    |
| 10 | URDD5     | RIGID BODY      | FIXED       | 0.000000E+00 | RADIANS/S/S    |
| 11 | URDD6     | RIGID BODY      | FIXED       | 0.000000E+00 | RADIANS/S/S    |

## CONTROL SURFACE POSITION AND HINGE MOMENT RESULTS

ACTIVE LIMITS ARE FLAGGED WITH AN (A), VIOLATED LIMITS ARE FLAGGED WITH A (V).

|   | CONTROL SURFACE                                              | LOWER LIMIT   | POSITION<br>VALUE | UPPER LIMIT  | LOWER LIMIT   | HINGE MOMENT<br>VALUE | UPPER LIMIT |
|---|--------------------------------------------------------------|---------------|-------------------|--------------|---------------|-----------------------|-------------|
|   | CT_AIL                                                       | -9.000020E+01 | 2.617990E-01      | 9.000021E+01 | N/A           | -1.663455E+01         | N/A         |
| 1 | MSC.NASTRAN AEROELASTIC JOB CREATED ON 02-APR-17 AT 15:52:33 |               |                   |              | APRIL 2, 2017 | MSC Nastran 7/ 3/15   | PAGE 16     |
|   | DEFAULT                                                      |               |                   |              |               |                       |             |

- The roll rate value needs to be noted for each subcase to create a Graph of the Roll at analysed Speed

# Roll Rate

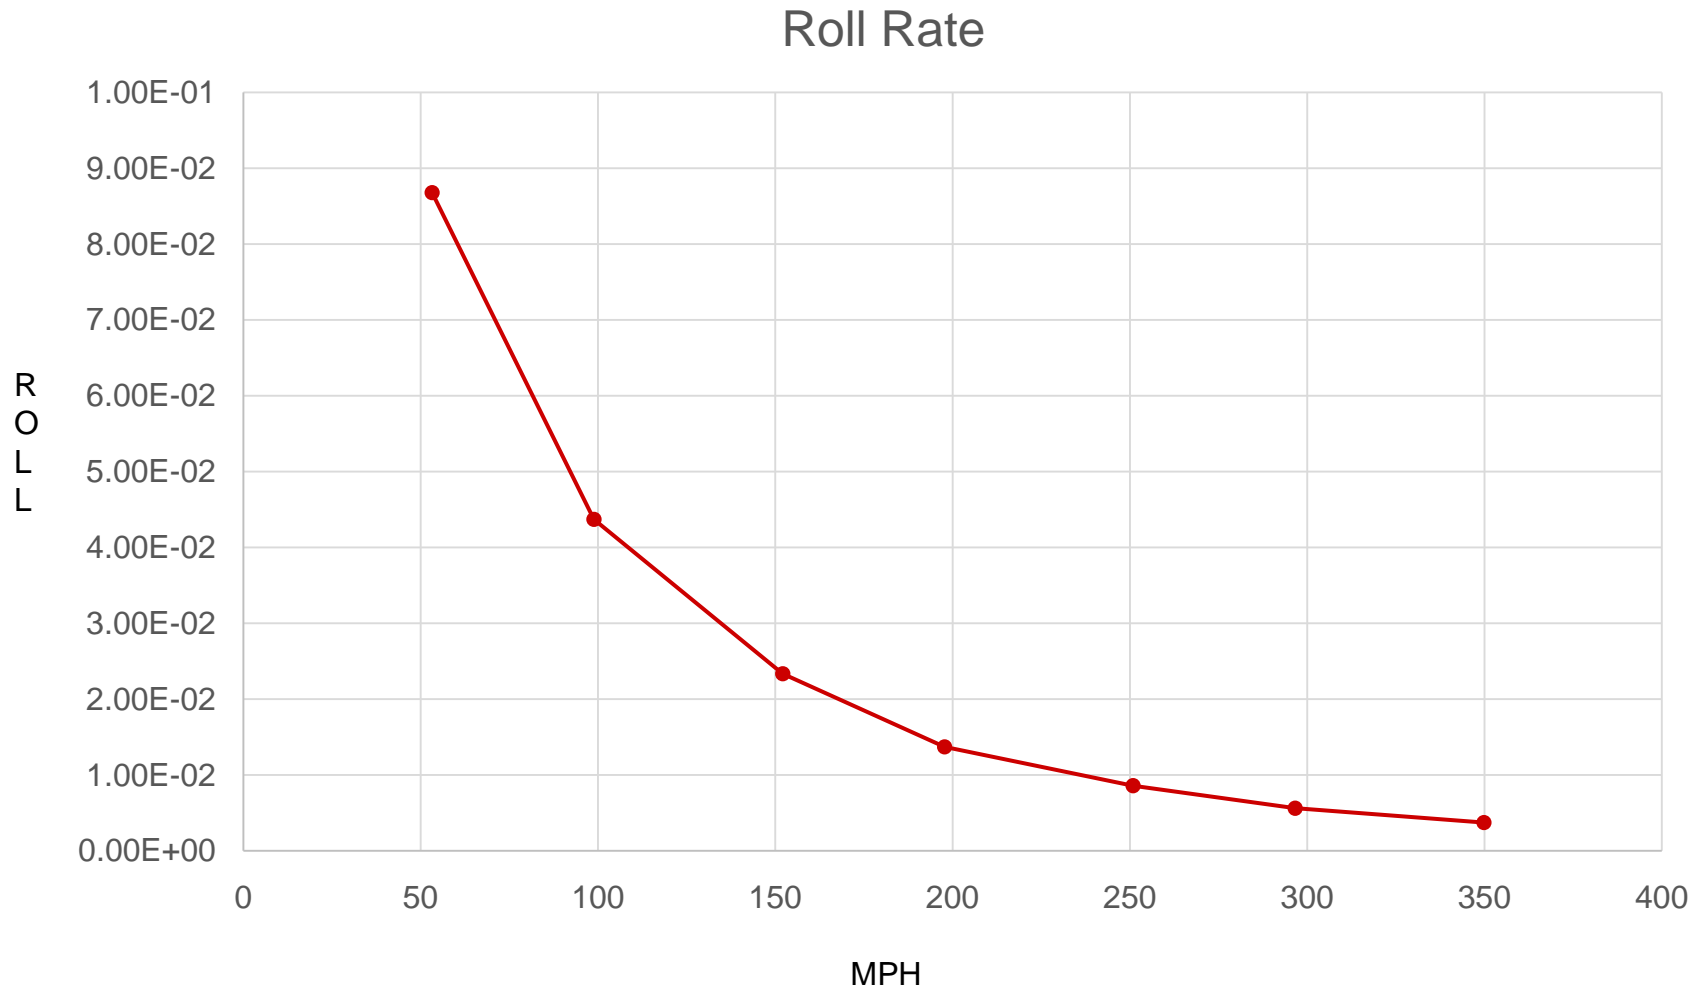

# Aileron Deflection

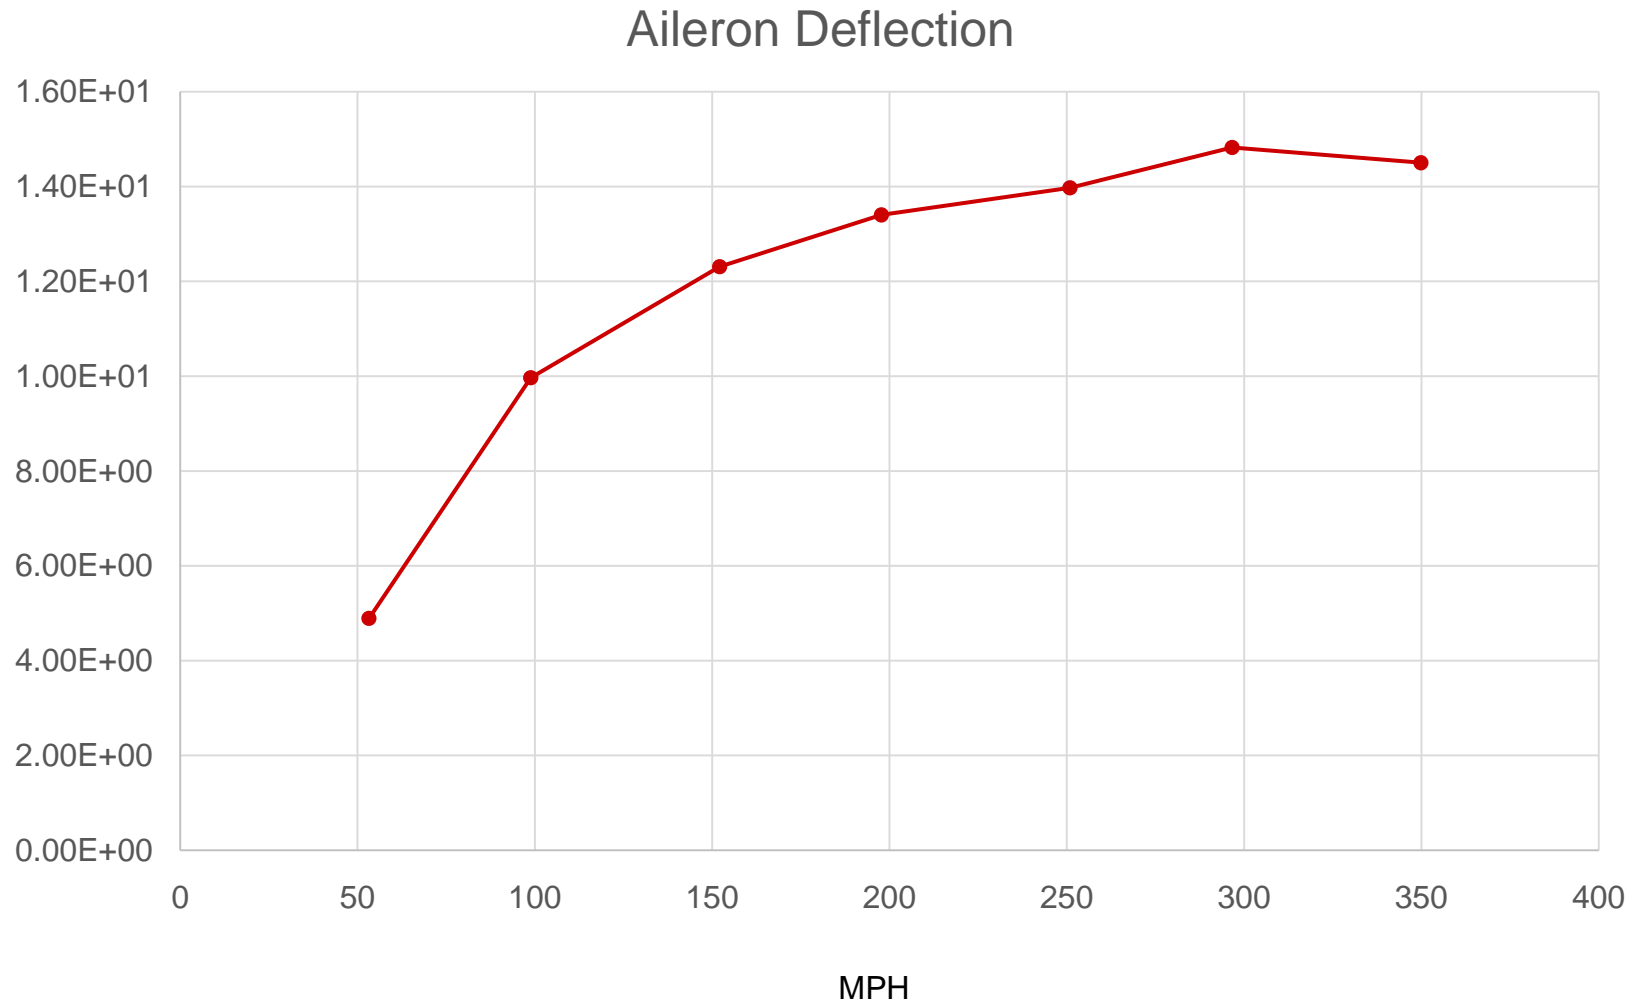

This values can be got by measuring the deflection angle of aileron wrt flat surface. Procedure for doing this has been added as an appendix section.

# Results → Displacements

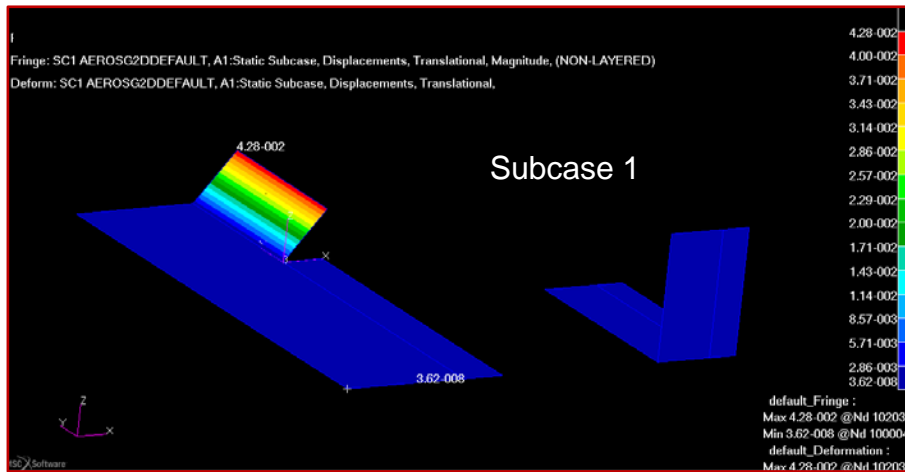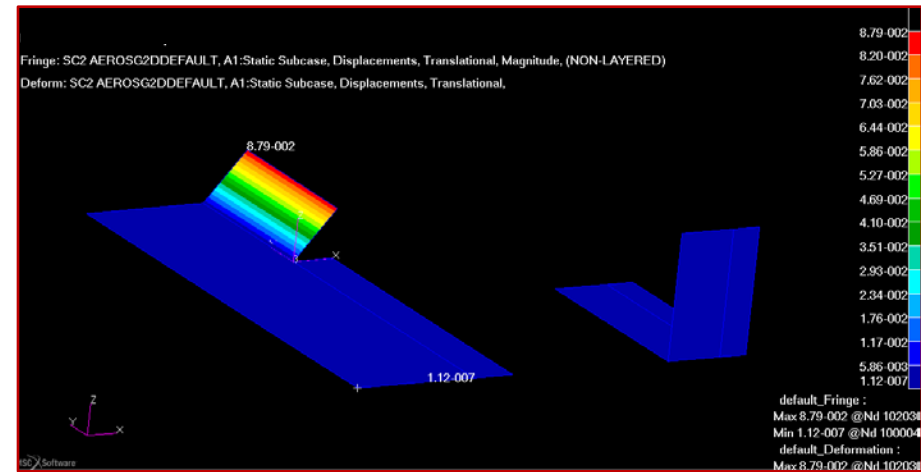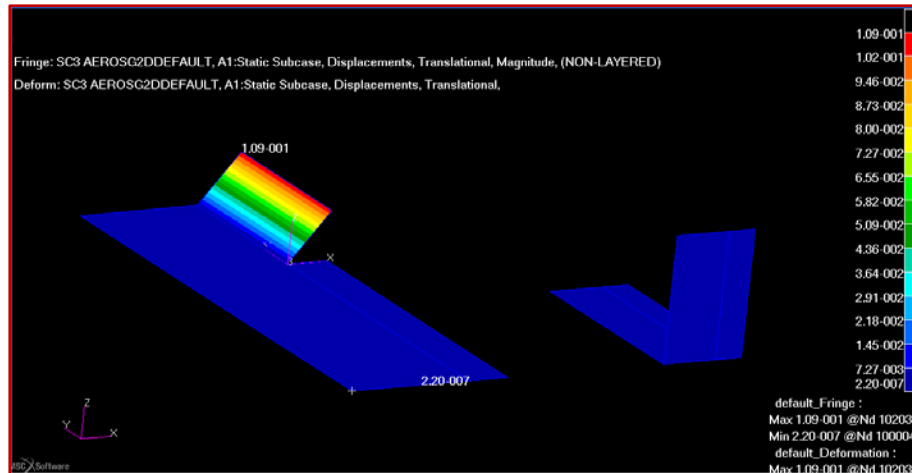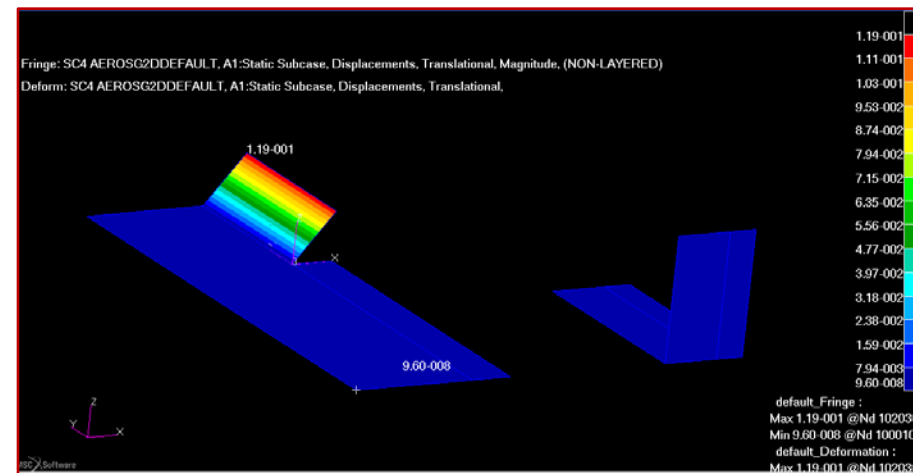

Only Aero-Mesh Posted

# Results → Displacements (Cont.)

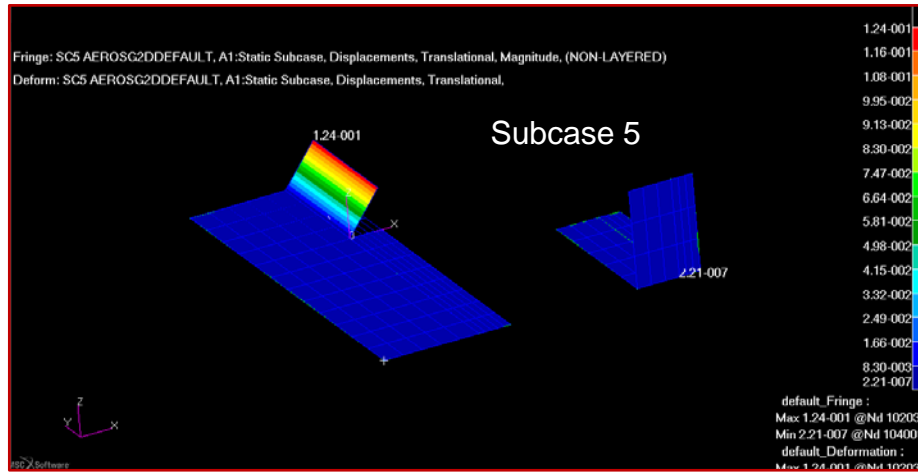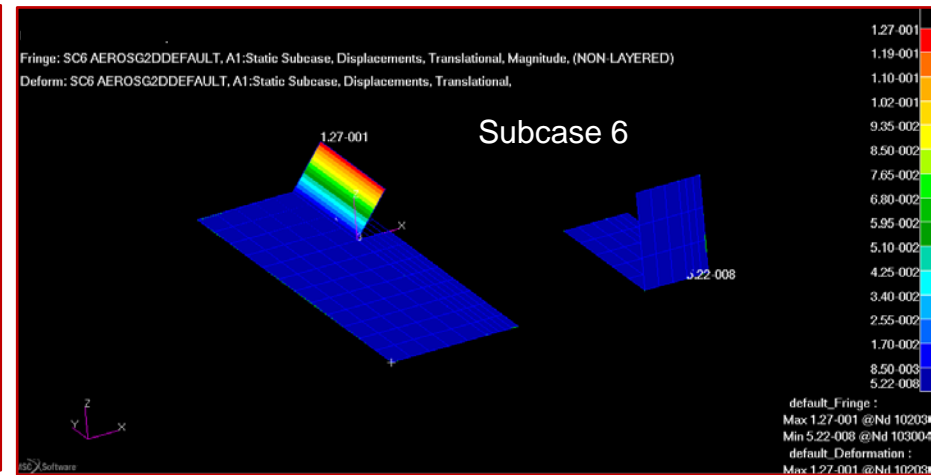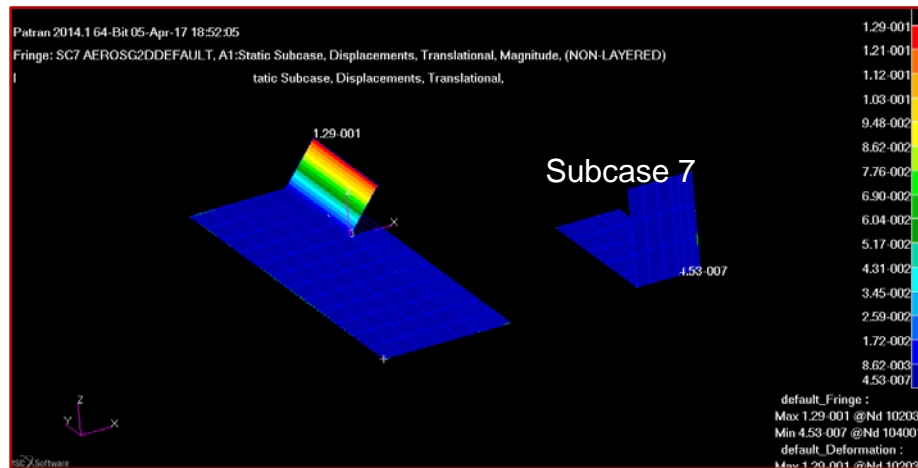

# Results → Aero Forces, Elemental Rigid & Aero Restrained Forces, Elemental Elastic

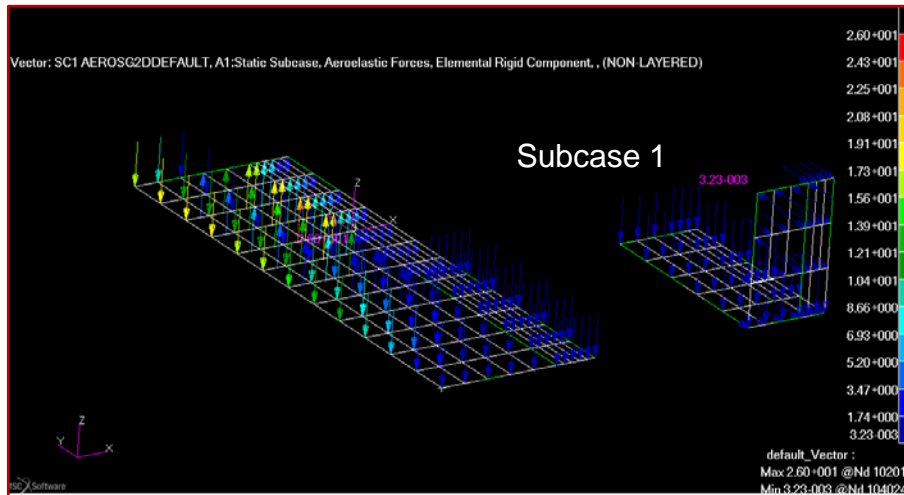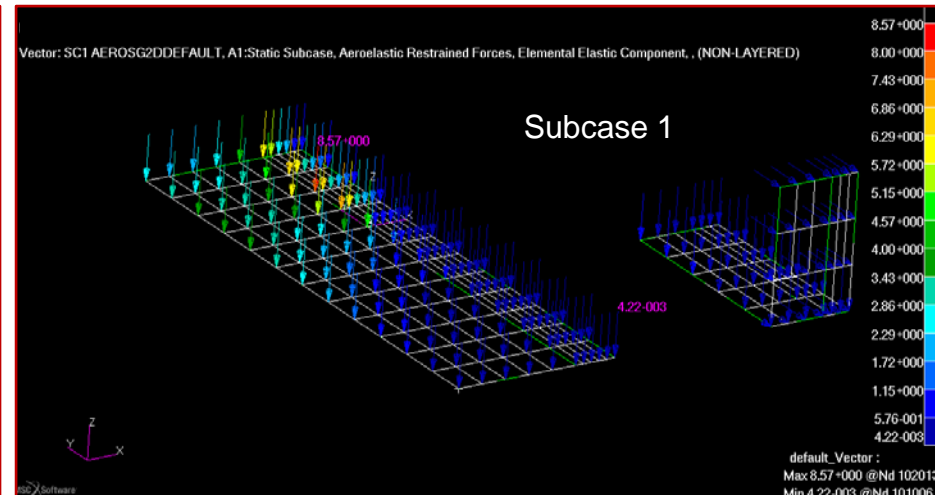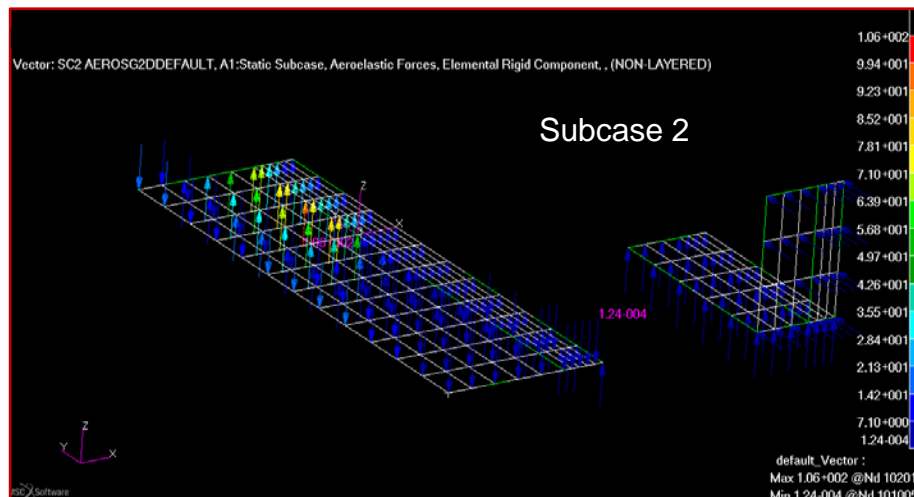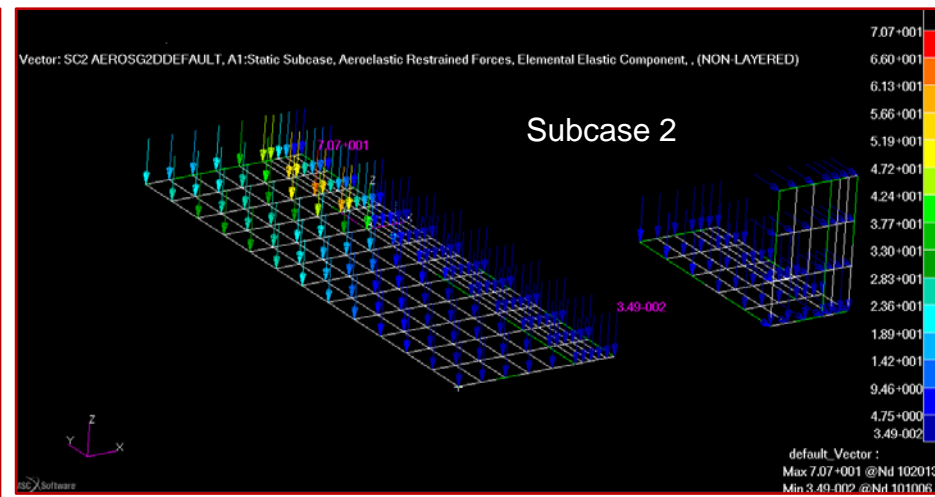

# Results → Aero Forces, Elemental Rigid & Aero Restrained Forces, Elemental Elastic

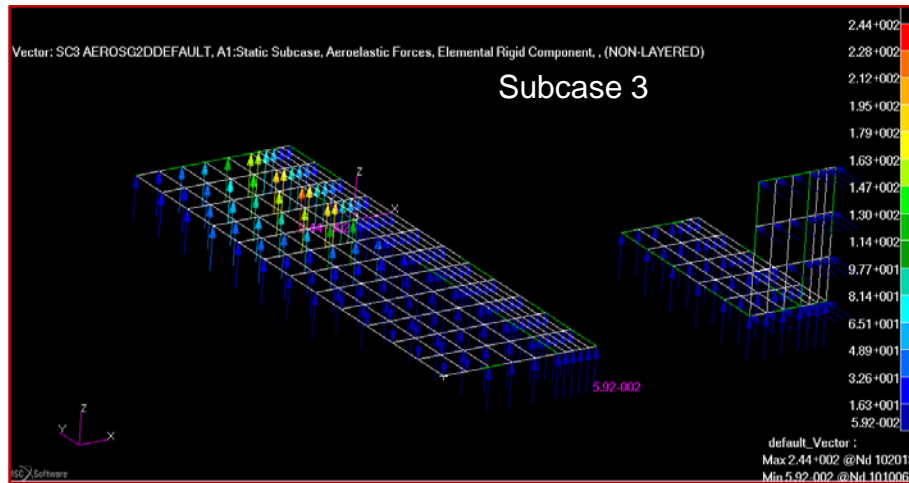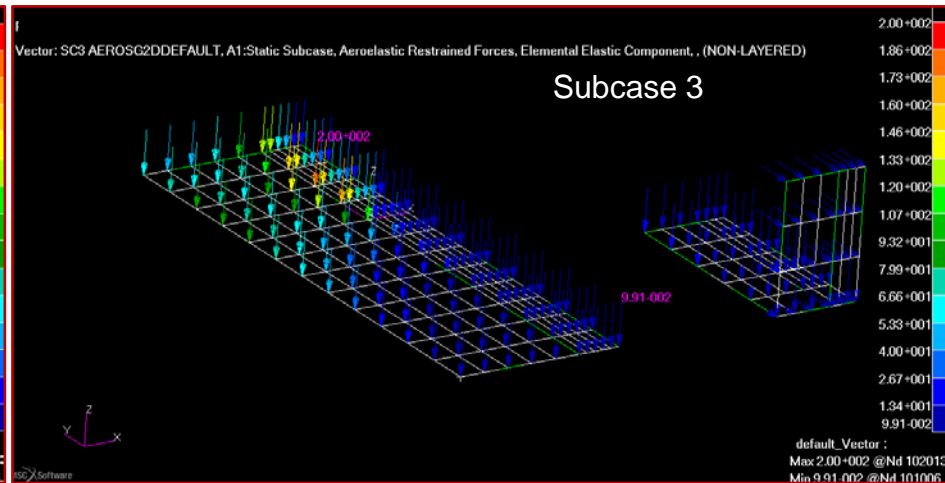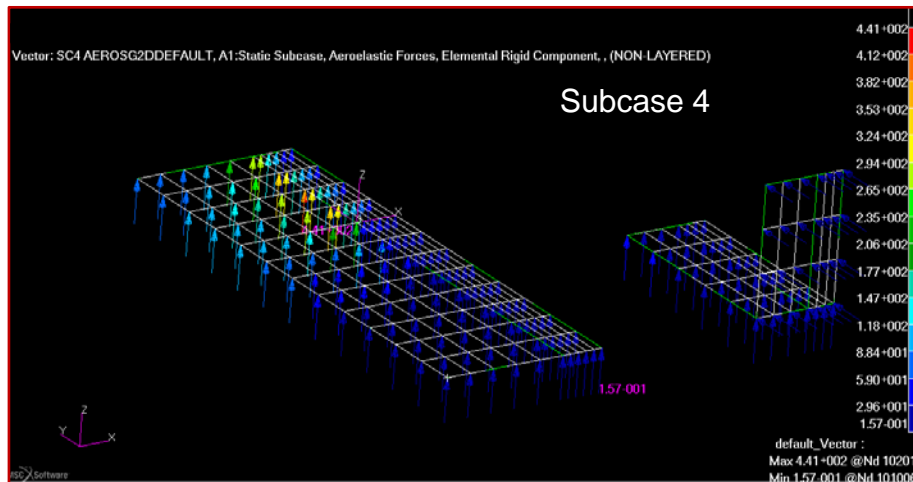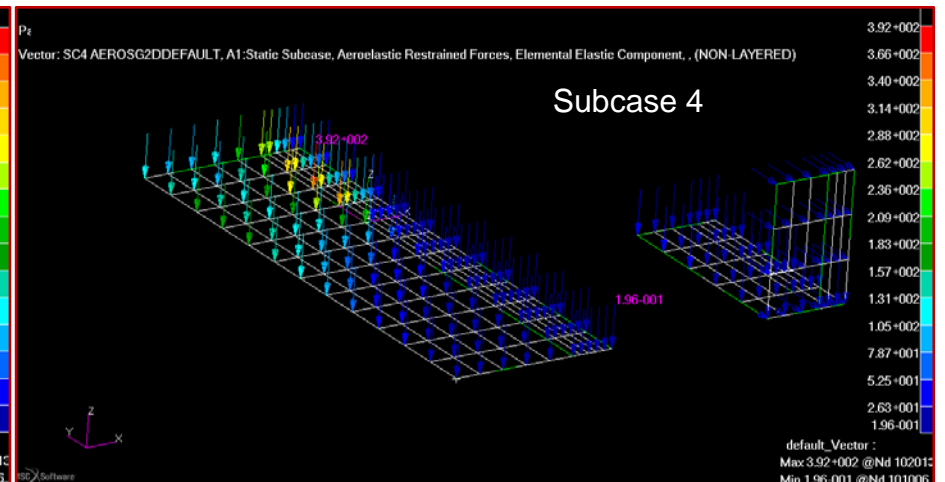

# Results → Aero Forces, Elemental Rigid & Aero Restrained Forces, Elemental Elastic

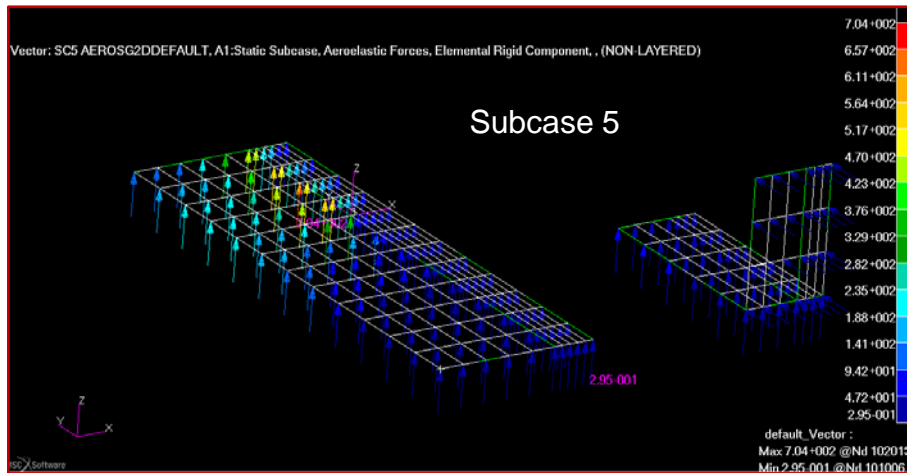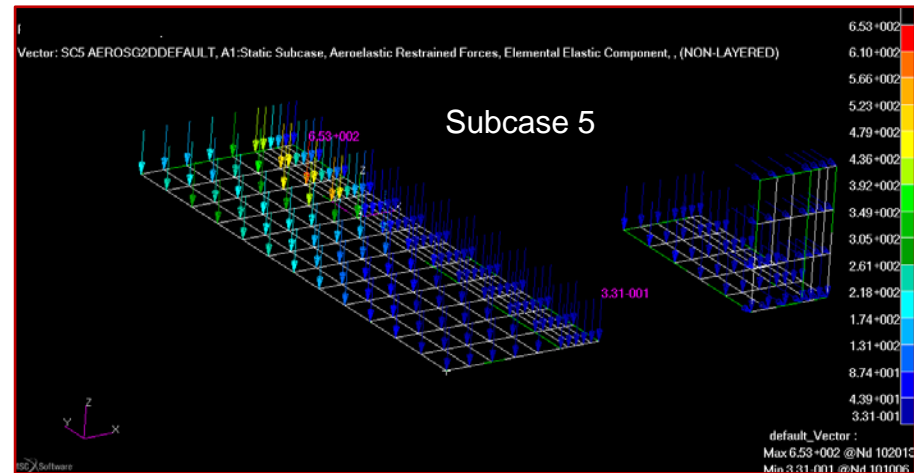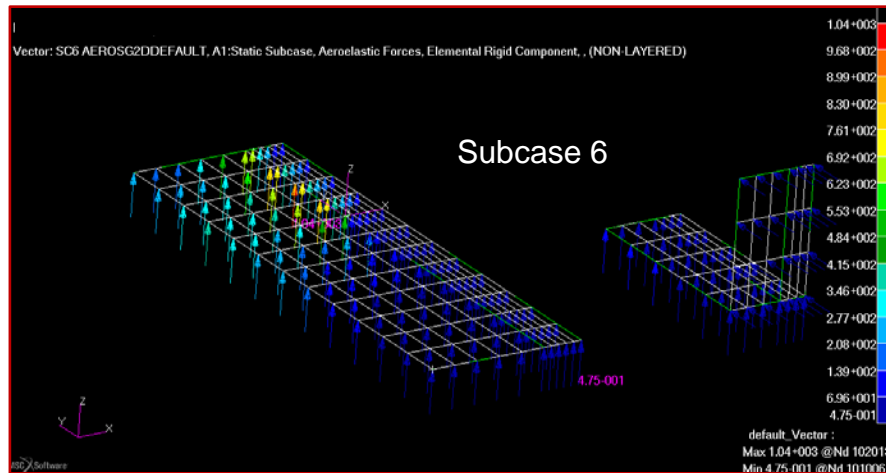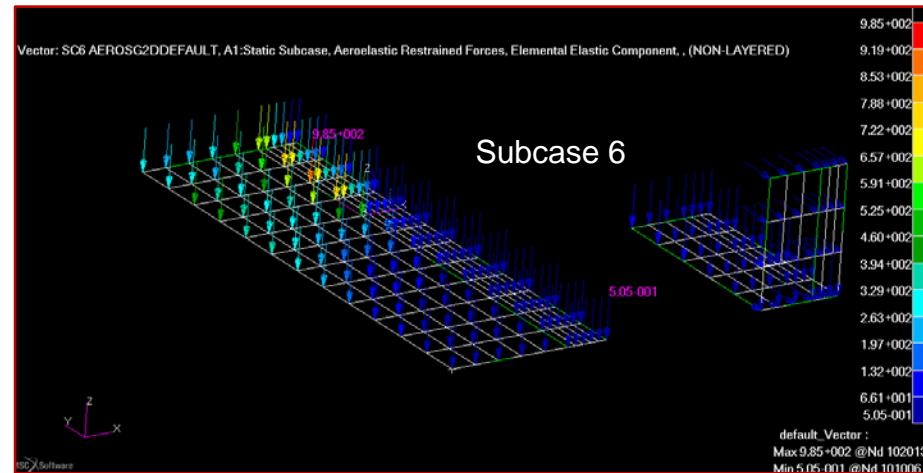

# Results → Aero Forces, Elemental Rigid & Aero Restrained Forces, Elemental Elastic

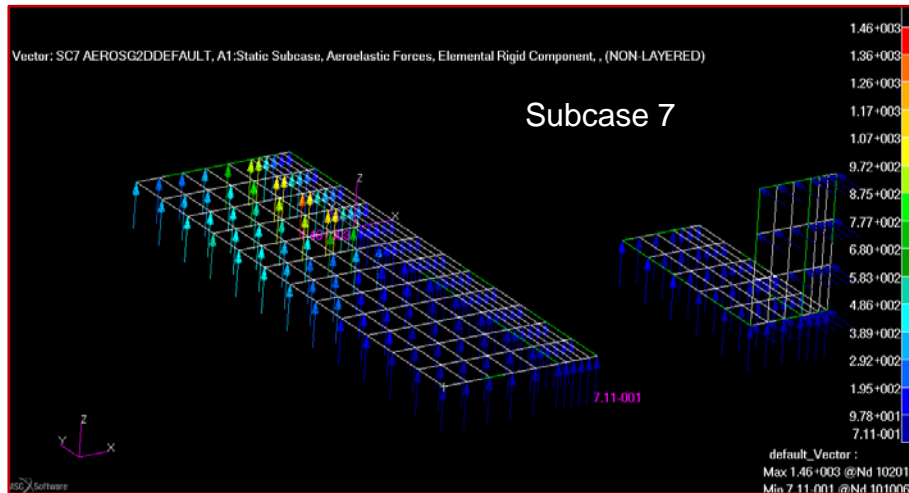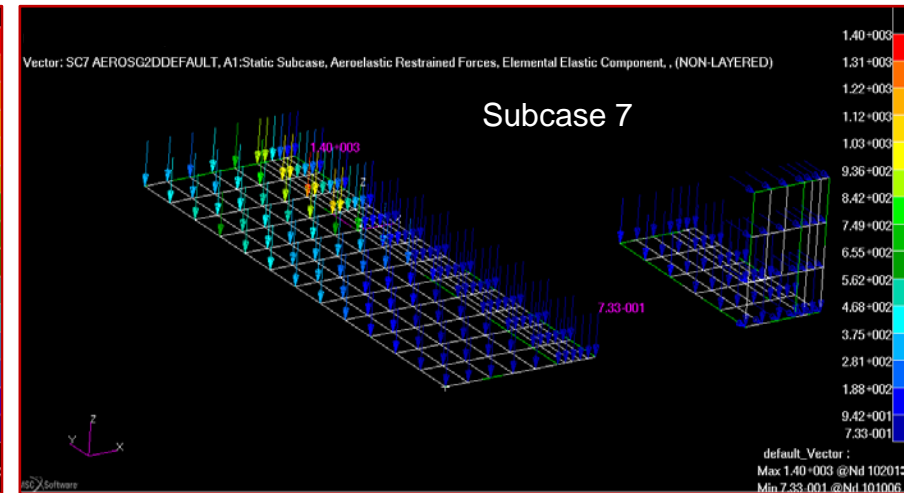

Supplement: f1 [file 5046395.f1.zip › WS_2_antisymm_2017.pdf]
