# Supplementary material for: Improving Aileron Effectiveness Based on Changing the Position of Aileron Connectors
Source: Hindawi journal article supplement (doi:10.1155/2019/5046395), 2019-06-04

# WORKSHOP 5

## FLUTTER WORKSHOP OF A SWEPT WING



- **Workshop Objectives**

- Find the matched point and the flutter boundary given the flight envelope
- Verify and animate the splines using normal modes
- Animate the flutter modes

- **Software Version**

- FlightLoads 2014

- **Files Required**

- modes.dat
- structure.bdf: Bulk data deck with structural model
- aero.bdf: Bulk data deck with aerodynamic model
- modes.dat: MSC Nastran input deck to run a normal modes analysis
- flutter\_setup\_import.bdf: Deck to import aero & structural mesh to proceed further with Flutter Setup

## • Problem Description (Swept Wing)

- Using the above files setup the flutter run, while following the guidelines for aeromesh, and find the matched flutter point.
- The structural model of the wing is a beam model, consisting of the front and rear spar and some ribs.
- The objective of this workshop is to find matched points and the flutter boundary.

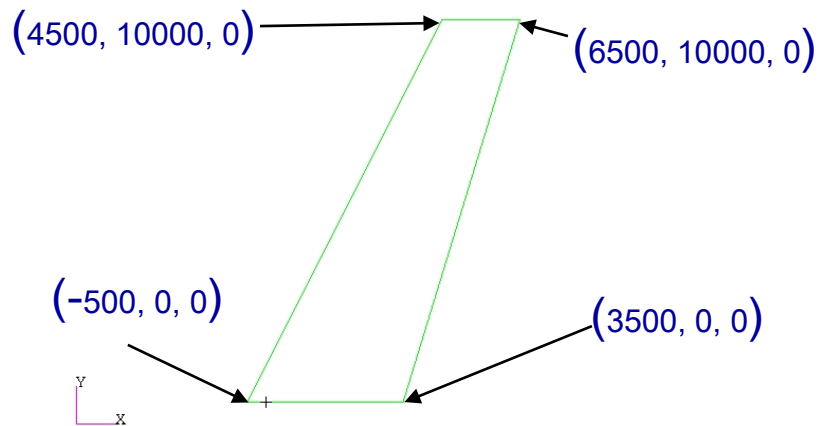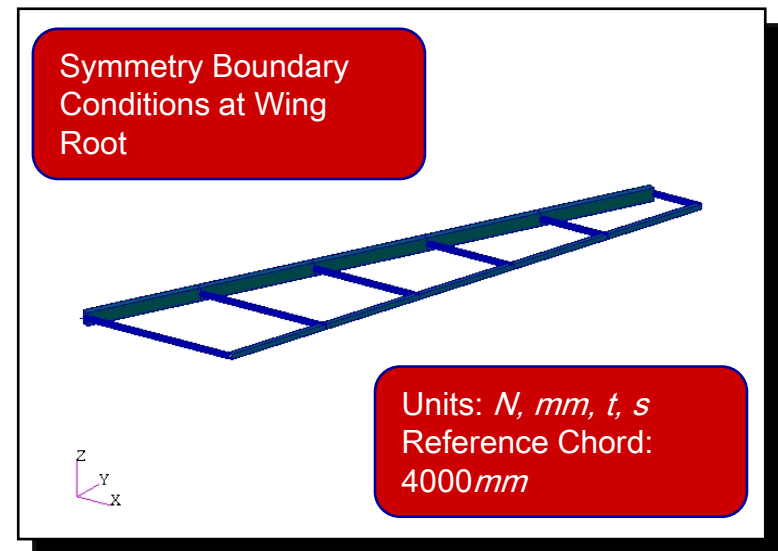

- **Suggested Steps**

1. Read in the structure model and aero model provided using flutter\_setup\_import.bdf
2. Verify the box/wave length by fringe plot
3. Run Modes.dat.
4. Import the results for Modes run.
5. Verify the Splines.
6. Create unsteady aerodynamics
7. Select the mach number, velocity and densities.
8. Run the analysis
9. Observe the flutter point and find matched point

# Tasks

- **Compute the first 5 symmetric normal modes of the wing.**
- **Import the structure into Flightloads.**
- **Verify the box/wave length by Fringe plot.**
- **Verify the spline.**
- **Run several flutter analyses to find the flutter boundary.**
  - Hint: Begin with  $M = 0.5$ .

# Atmosphere

- Atmosphere for the purpose of finding matched point is shown below
- Needed to fill in Density Ratios for PK method: SL to 5000m
  - FLFACT, 100, 1., 0.908, 0.821, 0.735, 0.669, 0.601

| Altitude | $\rho$                  | c          | $\rho/\rho_0$ | $\sqrt{\rho/\rho_0}$ |
|----------|-------------------------|------------|---------------|----------------------|
| 0        | 1.225                   | 340.290    | 1.000         | 1.107                |
| 1000     | 1.112                   | 336.430    | 0.908         | 1.055                |
| 2000     | 1.006                   | 332.525    | 0.821         | 1.003                |
| 3000     | 0.901                   | 328.574    | 0.735         | 0.949                |
| 4000     | 0.819                   | 324.575    | 0.669         | 0.905                |
| 5000     | 0.736                   | 320.526    | 0.601         | 0.858                |
| 7500     | 0.557                   | 310.172    | 0.455         | 0.746                |
| 10000    | 0.413                   | 299.460    | 0.337         | 0.643                |
| <i>m</i> | <i>kg/m<sup>3</sup></i> | <i>m/s</i> |               |                      |
|          |                         |            |               |                      |

# Flight Envelope

- See if flutter point exists within the Flight envelope below

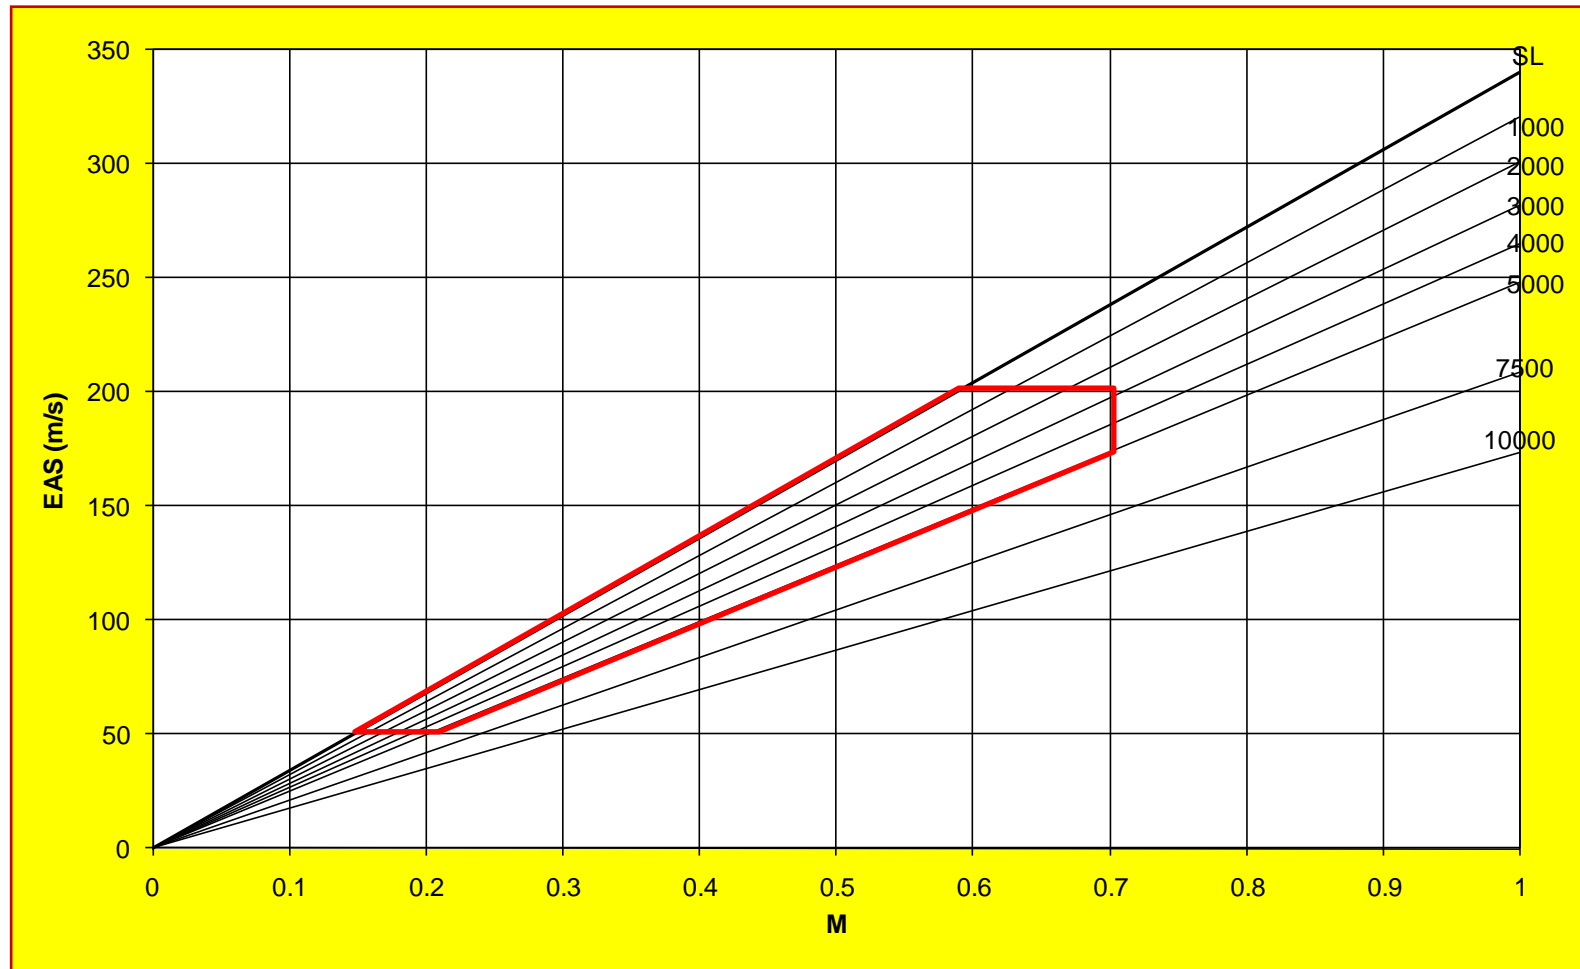

# Normal Modes Analysis

- Header file of modes.dat

```
SOL 103
CEND
$
SPC = 1
METHOD = 10
DISP(PLOT) = ALL
$
BEGIN BULK
$
PARAM, POST, 0
PARAM, GRDPNT, 0
$
EIGRL, 10,,, 5
$
INCLUDE 'structure.bdf'
$
SPC1, 1, 123456, 1, 7
$
ENDDATA
```

# Resonance Frequencies

- Normal modes analysis is needed for spline verification and to obtain highest frequency of interest to calculate minimum number of box/wavelength.

| MODE NO. | EXTRACTION ORDER | EIGENVALUE   | R E A L   E I G E N V A L U E S |              | GENERALIZED MASS | GENERALIZED STIFFNESS |
|----------|------------------|--------------|---------------------------------|--------------|------------------|-----------------------|
|          |                  |              | RADIANS                         | CYCLES       |                  |                       |
| 1        | 1                | 8.965433E+01 | 9.468597E+00                    | 1.506974E+00 | 1.000000E+00     | 8.965433E+01          |
| 2        | 2                | 1.302369E+03 | 3.608835E+01                    | 5.743640E+00 | 1.000000E+00     | 1.302369E+03          |
| 3        | 3                | 2.051788E+03 | 4.529667E+01                    | 7.209188E+00 | 1.000000E+00     | 2.051788E+03          |
| 4        | 4                | 3.463376E+03 | 5.885046E+01                    | 9.366341E+00 | 1.000000E+00     | 3.463376E+03          |
| 5        | 5                | 8.250501E+03 | 9.083227E+01                    | 1.445640E+01 | 1.000000E+00     | 8.250501E+03          |

# Aerodynamic Mesh – Number of Boxes

- Requirement: **15** Boxes per Wavelength
- Minimum Velocity:  $V_{\min} = 50m/s$
- Maximum Frequency:  $f_{\max} = 15Hz$
- Minimum Wavelength =  $V_{\min}/f_{\max} = 3.33m$
- Maximum Chord Length:  $4\ m$
- We need **15**  $\cdot (4/3.33) = 18$  boxes in chordwise direction.

# Aerodynamic Mesh

- Verify Aero mesh by using Aero Modeling ... Flat Plate Aero Modeling as shown.
- Plot the boxes/wave after entering minimum velocity and maximum frequency

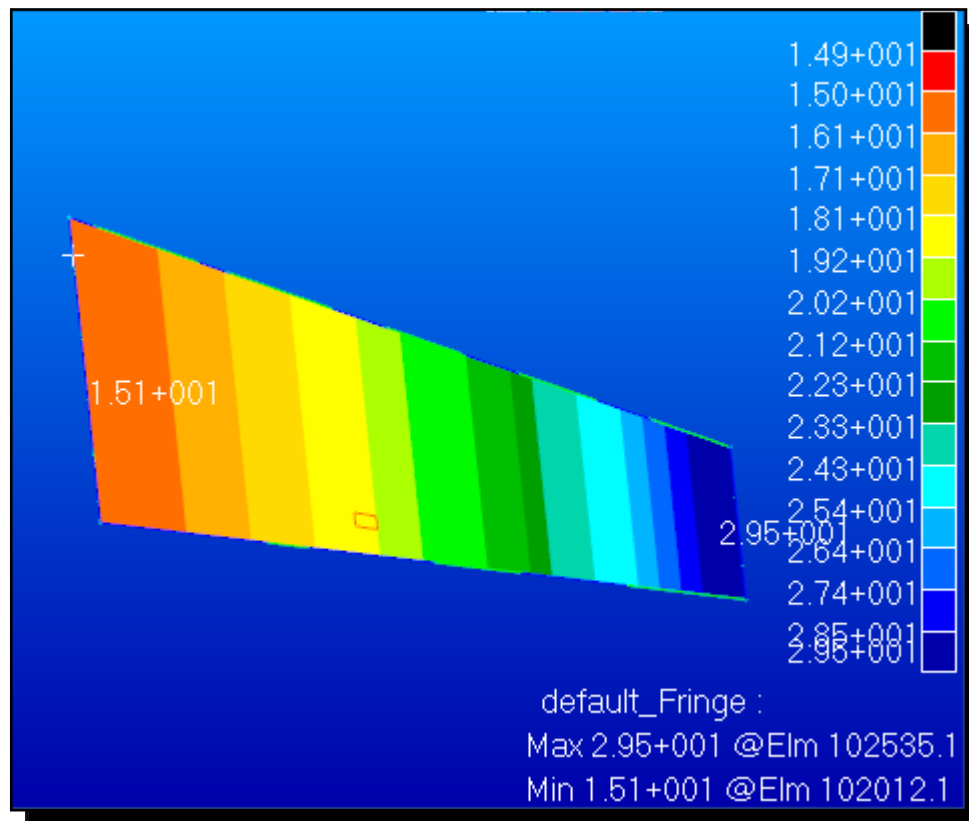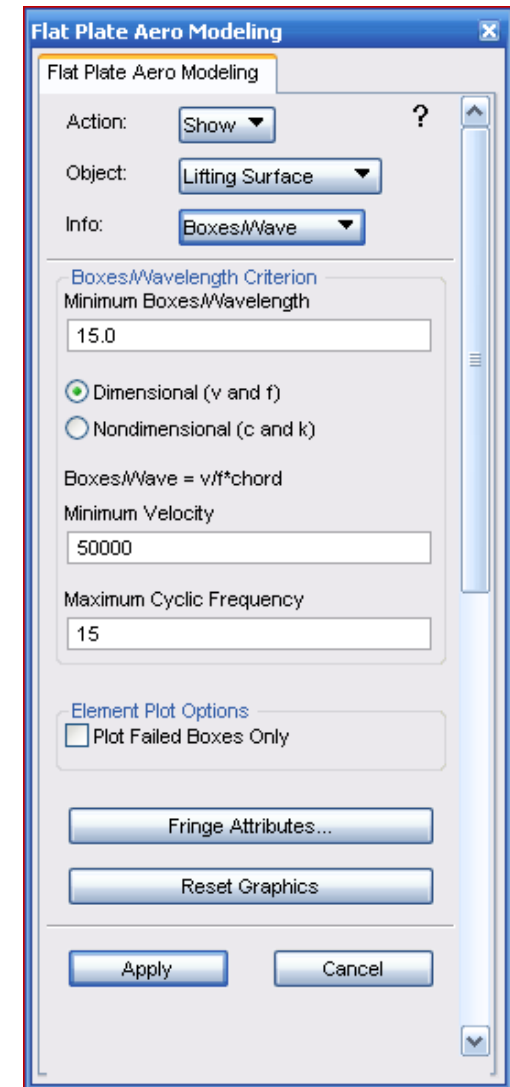

# Verify Spline using Mode Shapes

- Attach xdb file from modes.dat run
- spline verification of 1<sup>st</sup> mode

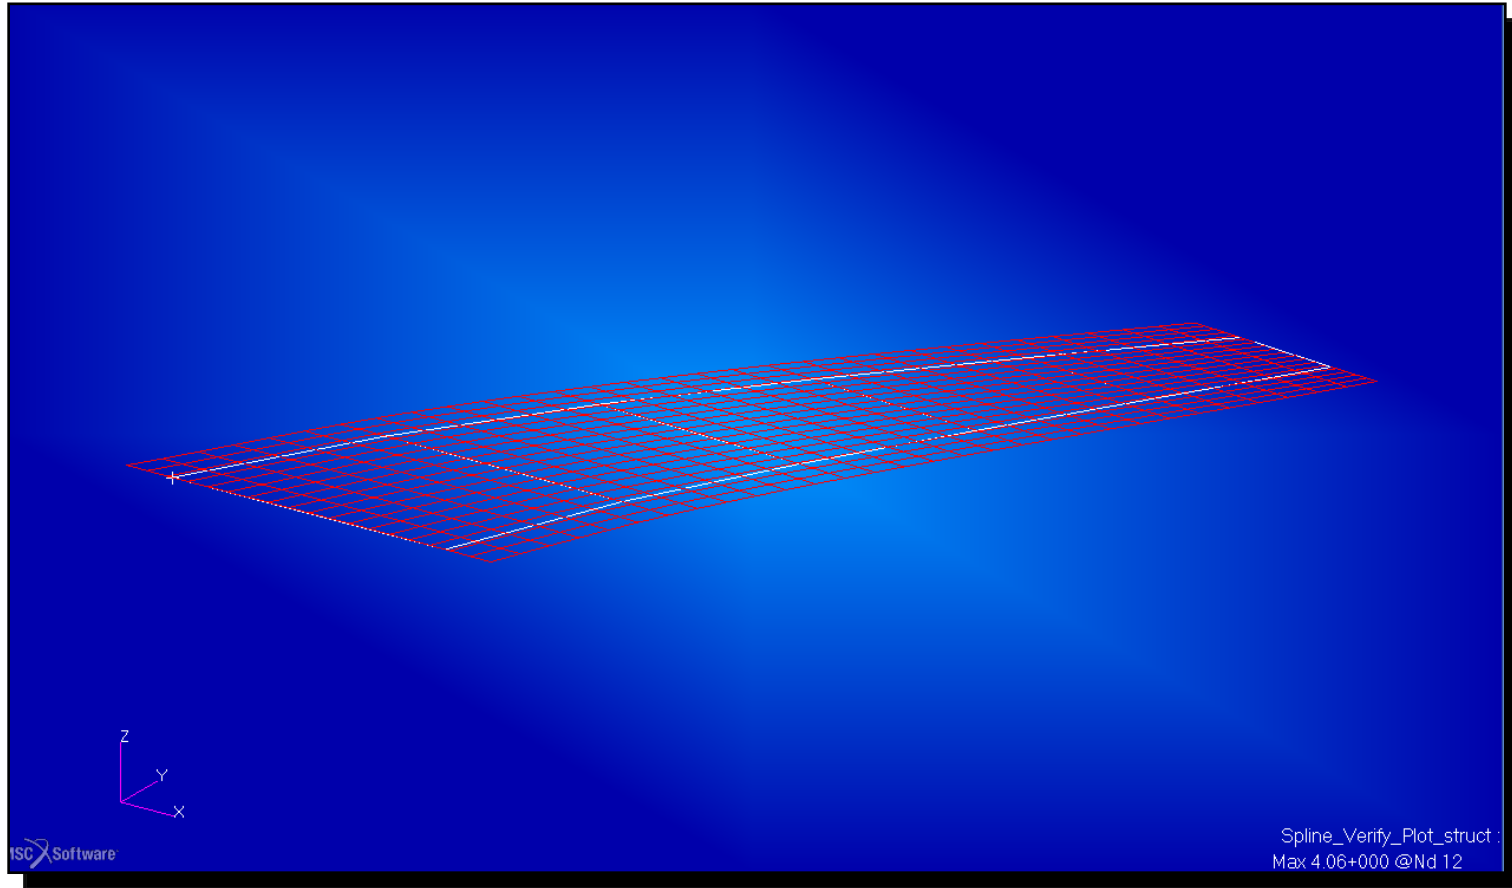

# Verify Spline using Mode Shapes (Cont.)

- Spline verification of 3rd mode

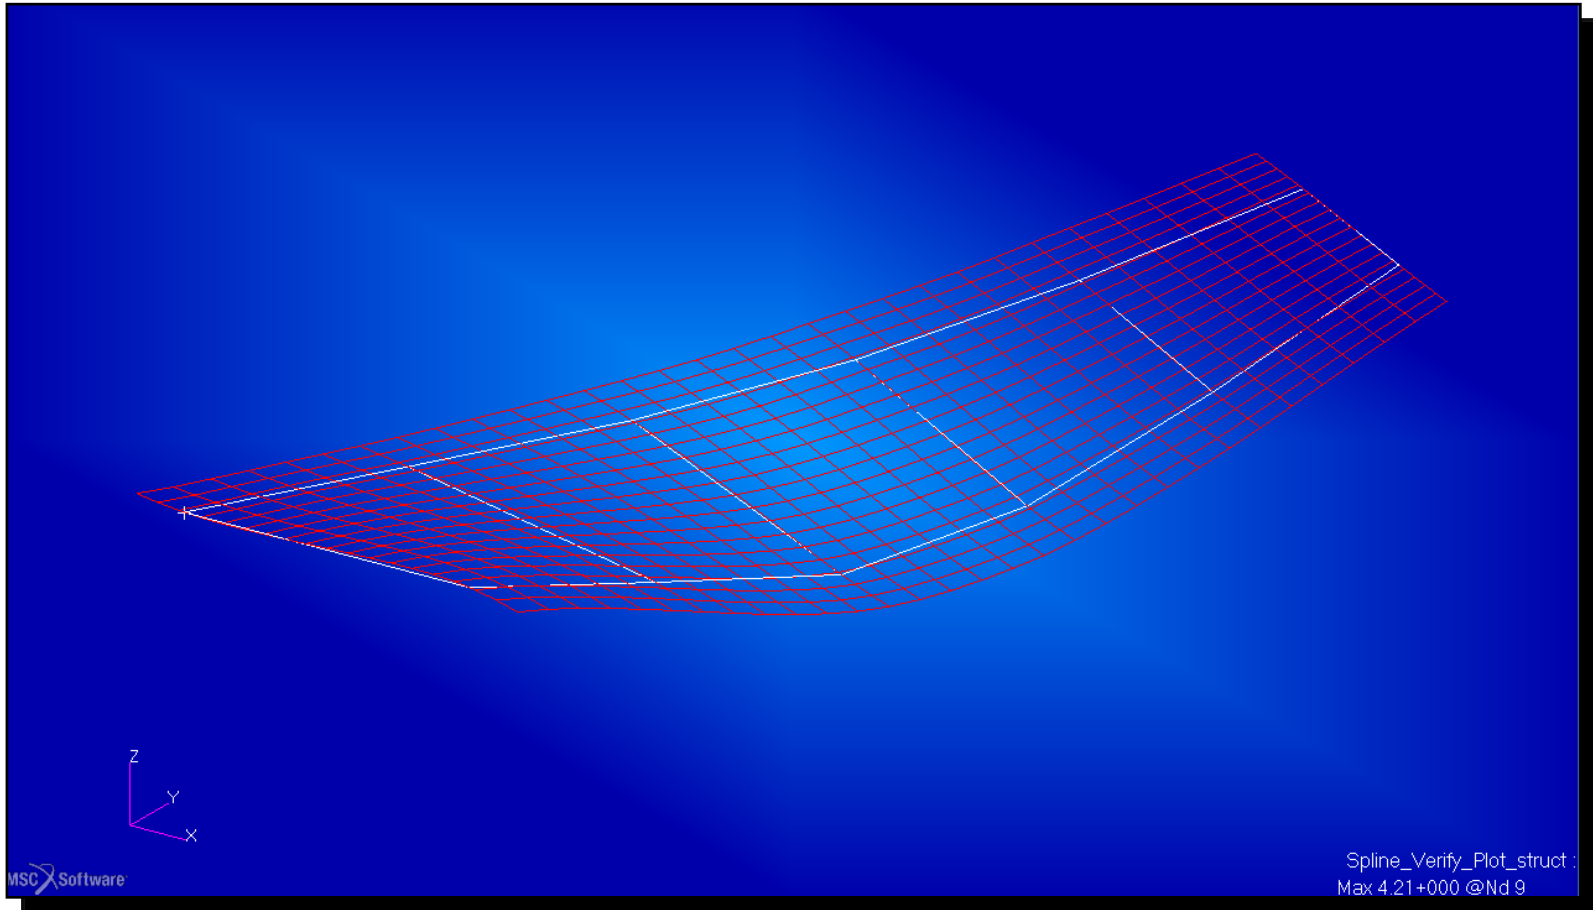

# Velocities and Reduced Frequencies

- It is recommended to run a first flutter analysis at  $M = 0.5$ .
- Minimum and maximum velocity from the flight envelope, together with  $f_{\min}$  and  $f_{\max}$ , are used to get  $k_{\min}$  and  $k_{\max}$ .
- Values will be adjusted based on the results of the first analysis.

| Altitude<br><i>m</i> | EAS<br><i>m/s</i> | TAS<br><i>m/s</i> |
|----------------------|-------------------|-------------------|
| 0                    | 170               | 170               |
| 5000                 | 125               | 146               |

$$k_{\min} = \frac{\omega_{\min} \bar{c}}{2TAS_{\max}} = 0.111$$

$$k_{\max} = \frac{\omega_{\max} \bar{c}}{2TAS_{\min}} = 1.291$$

# Set up the Analysis

- **Import flutter\_setup\_import.bdf structure and aero model in two steps**
  - First thru file menu in structure preference
    - This will import the structural portion of the model.
    - Then import the aero portion of the model via Flightloads import/export menu.
    - the INCLUDE statement will also import aero.bdf and structure.bdf)
- **Select the Splines (shown in earlier workshops)**

# Set Global Data

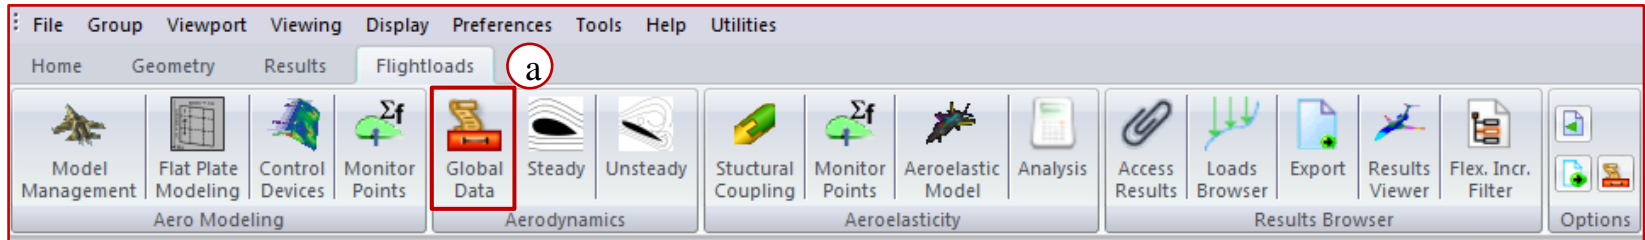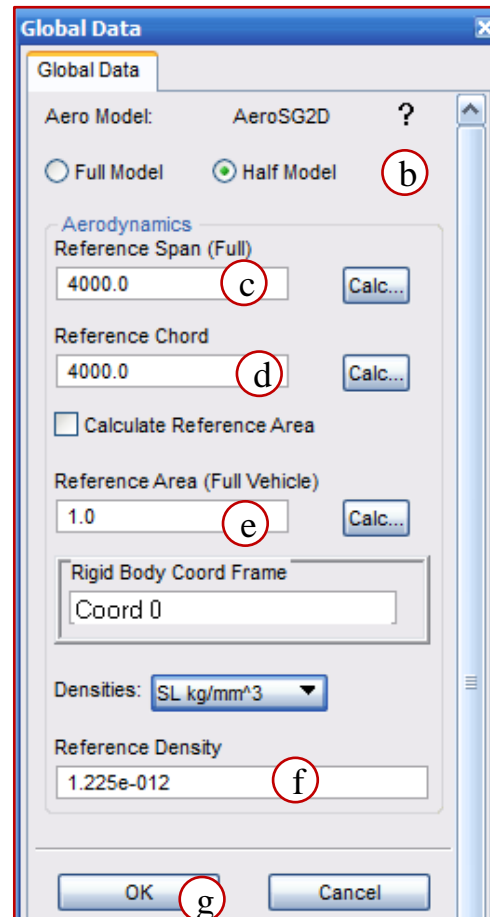

# Setting Unsteady Aerodynamics

- At Step d & e enter below table values.

| d | Mach No | e | Reduced Freq |
|---|---------|---|--------------|
|   | .5      |   | 0.2          |
|   | .5      |   | 0.5          |
|   | .5      |   | 0.6          |
|   | .5      |   | 0.7          |
|   | .5      |   | 1.0          |

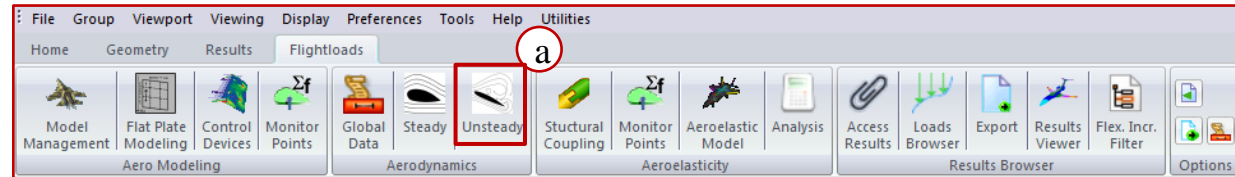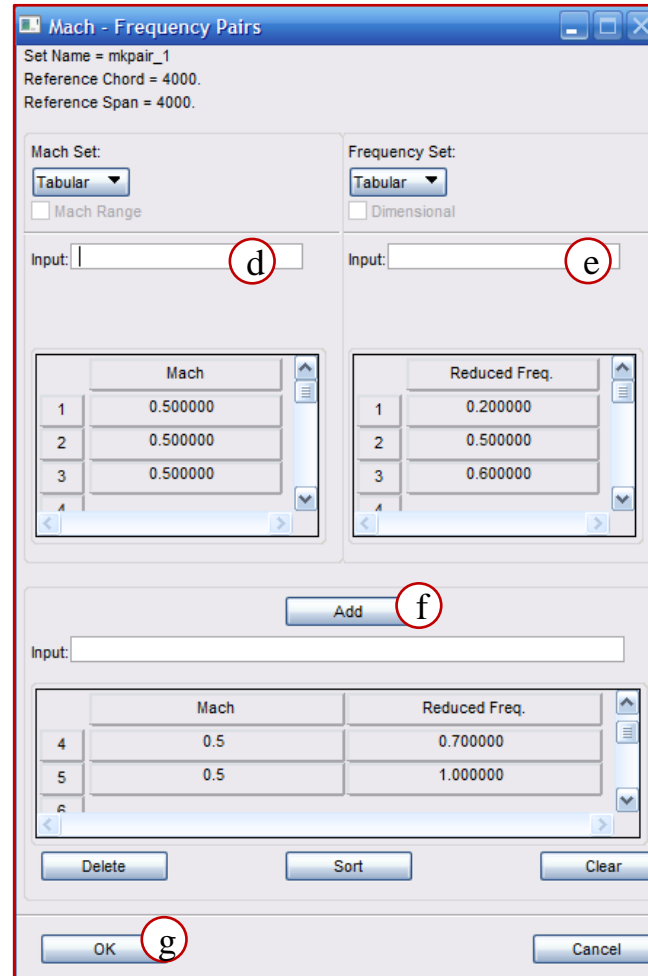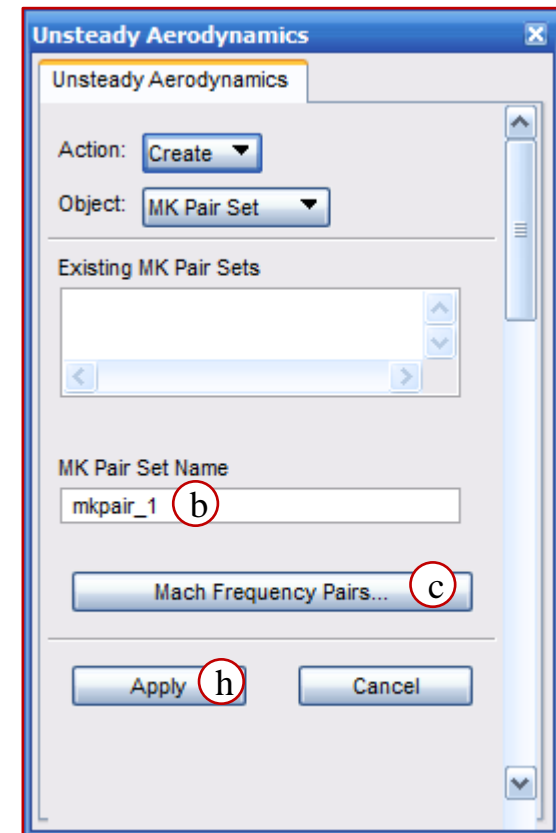

# Spline Selection

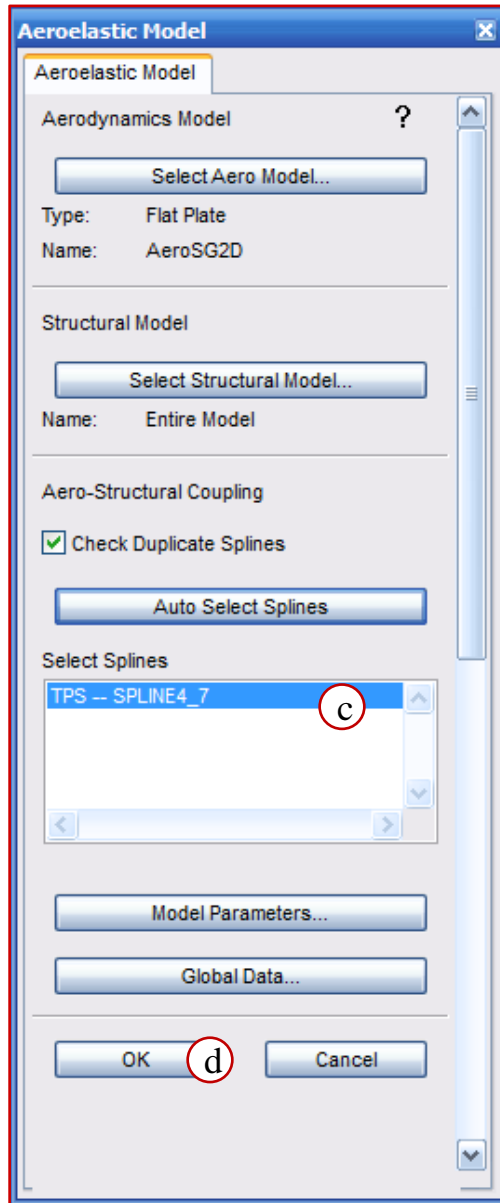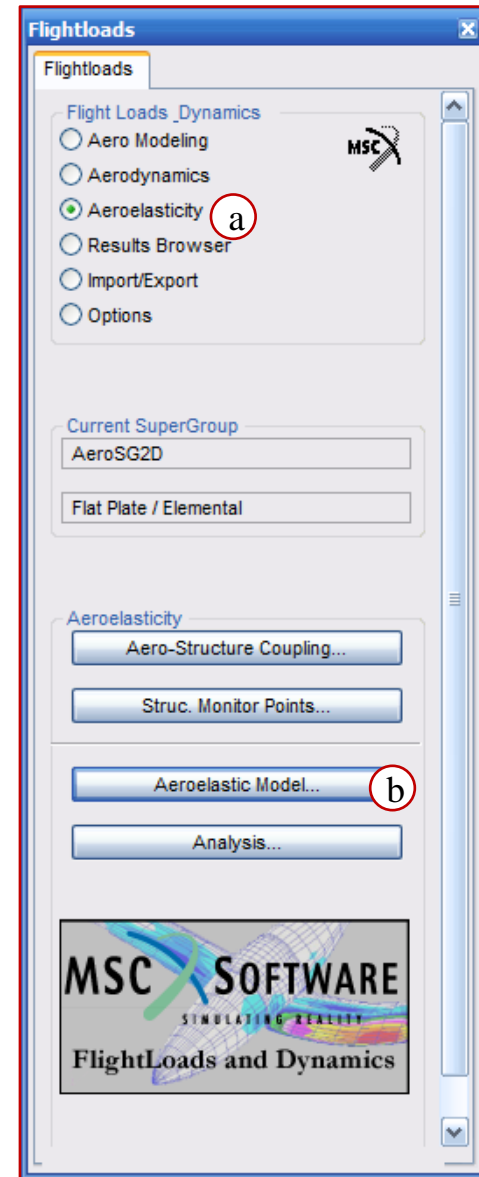

# Setup Analysis

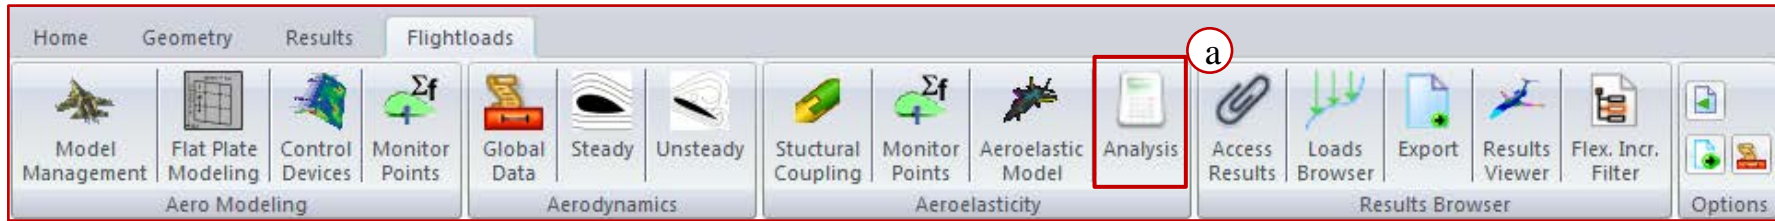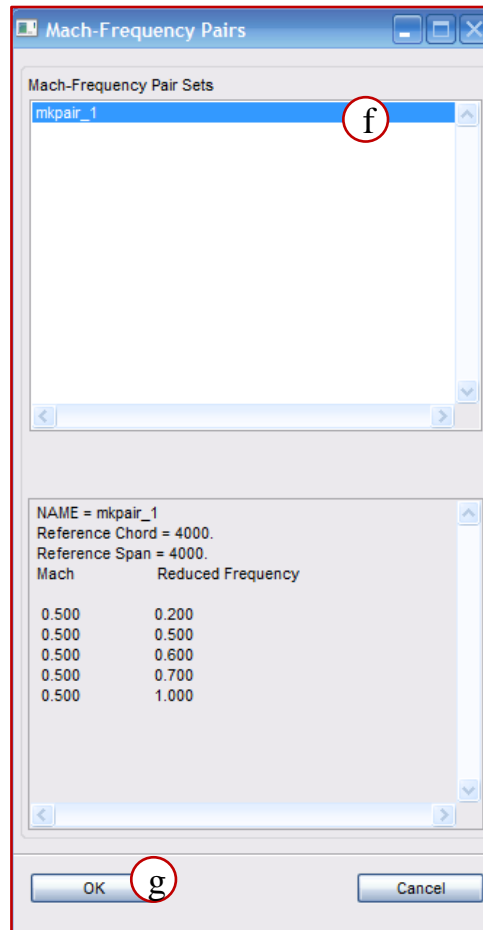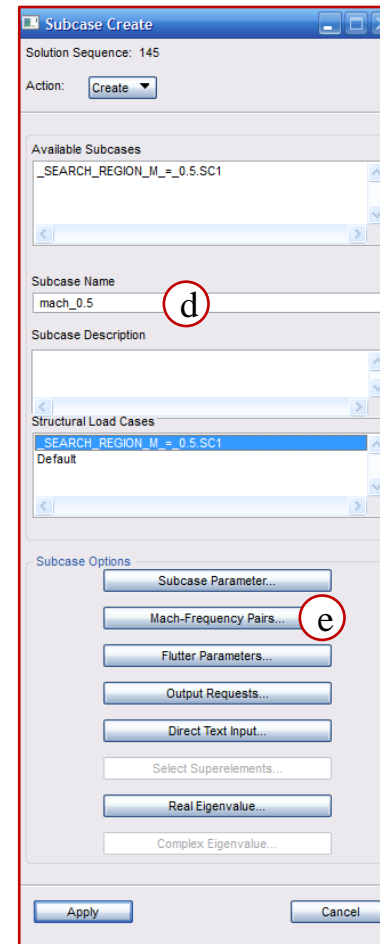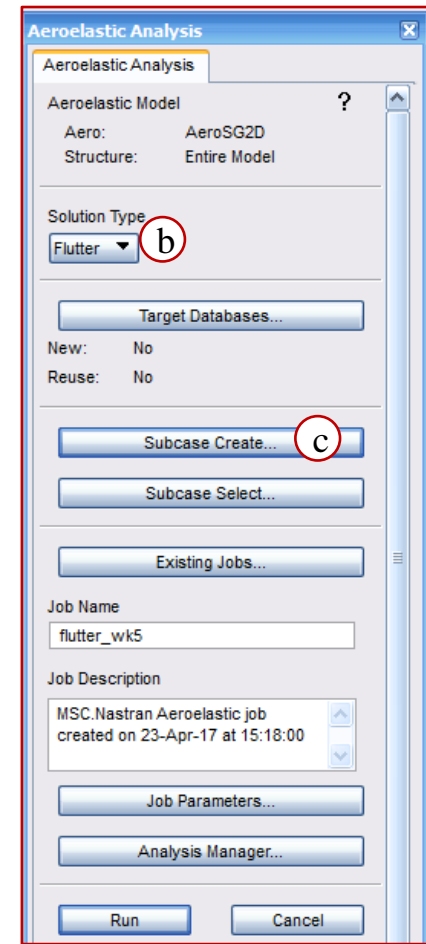

# Setup Analysis → Define Flutter Parameters

| Densities |
|-----------|
| 1.        |
| .908      |
| .821      |
| .735      |
| .669      |
| .601      |

**Density Ratio Sets**

Action: **Create**

Density Ratio Sets

Density Ratio Set Name: **densities**

Ref. Density = 1.2268E-012 (SL kg/mm<sup>3</sup>)

Input:

|   | Density Ratio |
|---|---------------|
| 1 | 1.0000        |
| 2 | 0.9080        |
| 3 | 0.8210        |
| 4 | 0.7350        |

Add Row... Delete...

Apply Cancel

**Flutter Parameters**

XZ Symmetry: **Symmetric**

XY Symmetry: **Asymmetric**

Method: **PK**

Mach: **.5**

Density Ratio Sets...

Velocity Sets...

Convergence Tolerance: **Default**

Number of Output Values: **Default**

OK Cancel

**Subcase Create**

Solution Sequence: 145

Action: **Create**

Available Subcases

SEARCH\_REGION\_M\_0.5.SC1

mach\_0.5

Subcase Name: **mach\_0.5**

Subcase Description

Structural Load Cases

SEARCH\_REGION\_M\_0.5.SC1

Default

Subcase Options

Subcase Parameter...

Mach-Frequency Pairs...

Flutter Parameters...

Output Requests...

Direct Text Input...

Select Superelements...

Real Eigenvalue...

Complex Eigenvalue...

Apply Cancel

# Setup Analysis → Define Flutter Parameters (Cont.)

- **Velocity Sets**
  - Enter the data shown. (158e3 to 170e3 in increments of 2.)
  - Be sure to select Yes for 162e3 through 170e3 mm/s

The screenshot shows the 'Velocity Sets' dialog box. At the top, the 'Action' dropdown is set to 'Create'. Below this is a list box for 'Velocity Sets'. The 'Velocity Set Name' field contains the text 'velocities', with a red circle 'a' around it. The 'Input' field is empty, with a red circle 'b' around it. Below these is a table with two columns: 'Velocity' and 'Vector'. The table contains four rows of data. A red circle 'c' is around the 'Vector' column header and the 'NO' value in the second row. At the bottom of the dialog, there are 'Add Row...' and 'Delete...' buttons. At the very bottom, there are 'Apply' and 'Cancel' buttons, with red circles 'd' and 'e' around them respectively.

|   | Velocity | Vector |
|---|----------|--------|
| 1 | 158000.0 | NO     |
| 2 | 160000.0 | NO     |
| 3 | 162000.0 | YES    |
| 4 | 164000.0 | YES    |

# Selection of Velocity and Density Set

**Velocity Sets**

Action: **Select** **f**

Velocity Sets **g**

| NAME = velocities | Vector |
|-------------------|--------|
| 158000.0          | NO     |
| 160000.0          | NO     |
| 162000.0          | YES    |
| 164000.0          | YES    |
| 166000.0          | YES    |
| 168000.0          | YES    |
| 170000.0          | YES    |

**Apply** **h** **Cancel**

**Density Ratio Sets**

Action: **Select** **b**

Density Ratio **c**

NAME = densities  
Reference Density = 1.2268E-012 (SL kg/mm<sup>3</sup>)  
Density Ratio

|            |
|------------|
| 1.         |
| 0.90799999 |
| 0.82099998 |
| 0.73500001 |
| 0.66900003 |
| 0.60100001 |

**Apply** **d** **Cancel**

**Flutter Parameters**

XZ Symmetry: Symmetric  
XY Symmetry: Asymmetric

Method: PK

Mach: .5 **a**

**Density Ratio Sets...** **e**

**Velocity Sets...**

Convergence Tolerance: Default  
Number of Output Values: Default

**OK** **i** **Cancel**

# Select Output Requests

- Insert below entries in Direct text input to obtain X-Y plot  
OUTPUT (XYPLOT)  
XPAPER=29.  
YPAPER=21.  
XGRID=YES  
YGRID=YES  
CURVELINESYMBOL = +1  
XYPLOT XYPAPLOT VG / 52(G,F)  
OUTPUT (PLOT)

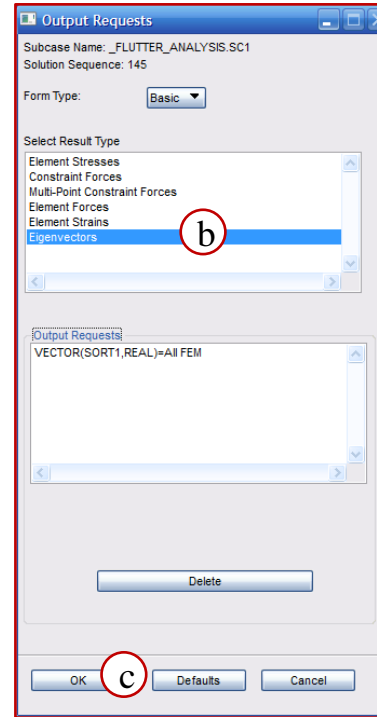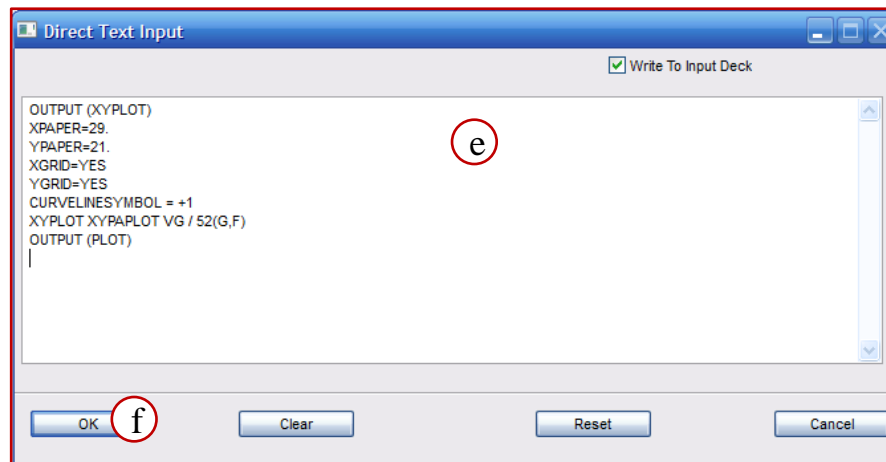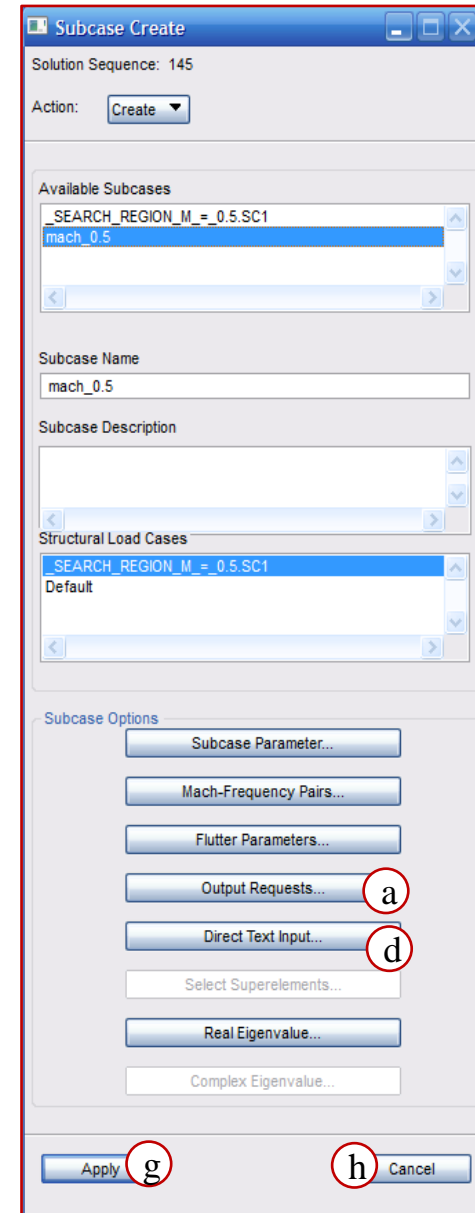

# Generate Nastran Input File

- In Job Parameters set the Analysis Type to Analysis Deck to Study the Input file

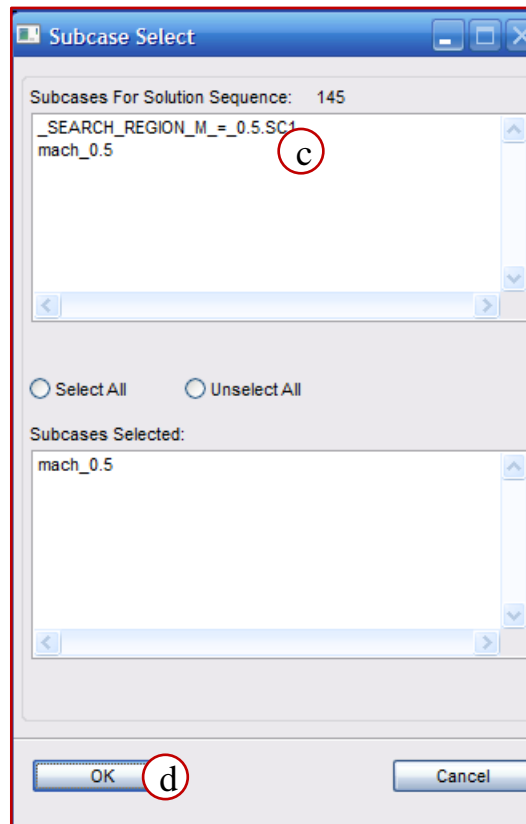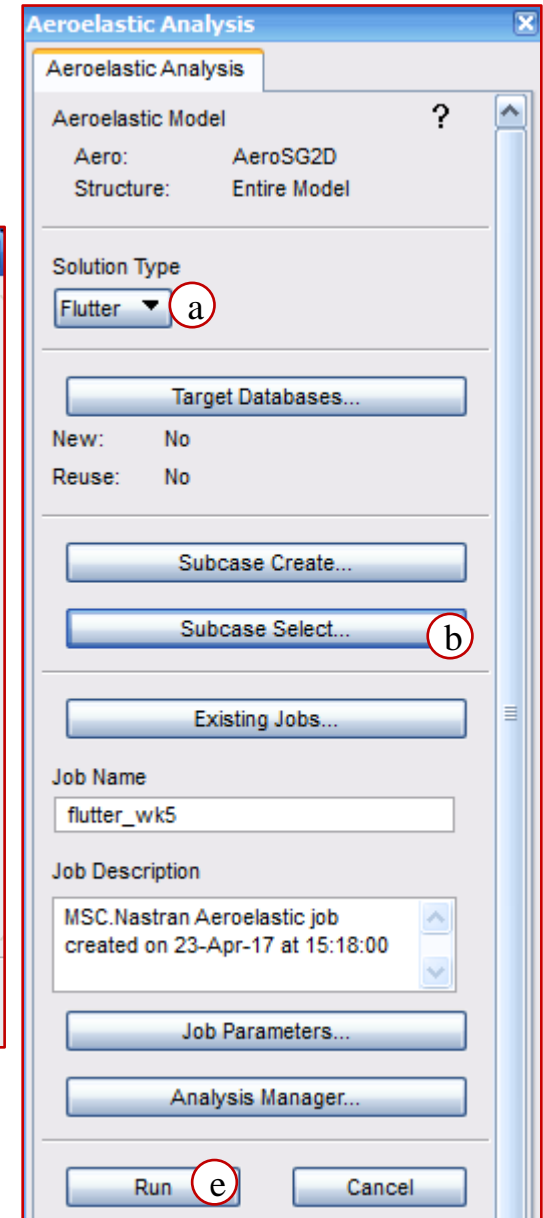

# First Results

- **Point=52 data has been sent to plt file. Pdf can be generated from it as shown in earlier workshop.**
- **The Flutter Summary in the .f06 shows that flutter occurs for points 4, 20, 36, 52, 68 and 84. Sample output shown in the next page.**
- **The flutter velocities are between 158 *m/s* and 170 *m/s*.**

# Flutter Summary Results

|                                                                           |                      |                            |                |                |                |                  |
|---------------------------------------------------------------------------|----------------------|----------------------------|----------------|----------------|----------------|------------------|
| 0                                                                         |                      |                            |                |                |                |                  |
| FLUTTER SUMMARY                                                           |                      |                            |                |                |                |                  |
| CONFIGURATION = AEROSG2D XY-SYMMETRY = ASYMMETRIC XZ-SYMMETRY = SYMMETRIC |                      |                            |                |                |                |                  |
| POINT = 4                                                                 | MACH NUMBER = 0.5000 | DENSITY RATIO = 1.0000E+00 | METHOD = PK    |                |                |                  |
| KFREQ                                                                     | 1./KFREQ             | VELOCITY                   | DAMPING        | FREQUENCY      | COMPLEX        | EIGENVALUE       |
| 0.5987                                                                    | 1.6703341E+00        | 1.5800000E+05              | -3.2891823E-03 | 7.5273805E+00  | -7.7782463E-02 | 4.7295927E+01    |
| 0.5902                                                                    | 1.6944747E+00        | 1.6000000E+05              | 1.0735900E-02  | 7.5140666E+00  | 2.5343313E-01  | 4.7212273E+01    |
| 0.5821                                                                    | 1.7178777E+00        | 1.6200000E+05              | 2.5805338E-02  | 7.5043472E+00  | 6.0837639E-01  | 4.7151204E+01    |
| 0.5746                                                                    | 1.7404287E+00        | 1.6400000E+05              | 4.1761565E-02  | 7.4985581E+00  | 9.8379452E-01  | 4.7114830E+01    |
| 0.5675                                                                    | 1.7620408E+00        | 1.6600000E+05              | 5.8407477E-02  | 7.4969093E+00  | 1.3756266E+00  | 4.7104470E+01    |
| 0.5610                                                                    | 1.7826644E+00        | 1.6800000E+05              | 7.5525690E-02  | 7.4994569E+00  | 1.7794033E+00  | 4.7120478E+01    |
| 0.5549                                                                    | 1.8022887E+00        | 1.7000000E+05              | 9.2900715E-02  | 7.5061059E+00  | 2.1907036E+00  | 4.7162254E+01    |
| 1 MSC.NASTRAN AEROELASTIC JOB CREATED ON 23-APR-17 AT 15:18:00            |                      |                            |                | APRIL 23, 2017 | MSC Nastran    | 7/ 3/15 PAGE 268 |
| _SEARCH_REGION_M = 0.5.SC1                                                |                      |                            |                |                |                |                  |

|                                                                           |                      |                            |                |                |                |                  |
|---------------------------------------------------------------------------|----------------------|----------------------------|----------------|----------------|----------------|------------------|
| 0                                                                         |                      |                            |                |                |                |                  |
| FLUTTER SUMMARY                                                           |                      |                            |                |                |                |                  |
| CONFIGURATION = AEROSG2D XY-SYMMETRY = ASYMMETRIC XZ-SYMMETRY = SYMMETRIC |                      |                            |                |                |                |                  |
| POINT = 20                                                                | MACH NUMBER = 0.5000 | DENSITY RATIO = 9.0800E-01 | METHOD = PK    |                |                |                  |
| KFREQ                                                                     | 1./KFREQ             | VELOCITY                   | DAMPING        | FREQUENCY      | COMPLEX        | EIGENVALUE       |
| 0.6033                                                                    | 1.6576322E+00        | 1.5800000E+05              | -1.5735803E-02 | 7.5850606E+00  | -3.7497114E-01 | 4.7658341E+01    |
| 0.5940                                                                    | 1.6836008E+00        | 1.6000000E+05              | -5.5804898E-03 | 7.5625975E+00  | -1.3258463E-01 | 4.7517202E+01    |
| 0.5850                                                                    | 1.7093672E+00        | 1.6200000E+05              | 5.6383898E-03  | 7.5417094E+00  | 1.3359025E-01  | 4.7385958E+01    |
| 0.5764                                                                    | 1.7348226E+00        | 1.6400000E+05              | 1.7935517E-02  | 7.5227897E+00  | 4.2387978E-01  | 4.7267082E+01    |
| 0.5682                                                                    | 1.7598406E+00        | 1.6600000E+05              | 3.1292873E-02  | 7.5062821E+00  | 7.3793853E-01  | 4.7163361E+01    |
| 0.5604                                                                    | 1.7842857E+00        | 1.6800000E+05              | 4.5650694E-02  | 7.4926428E+00  | 1.0745640E+00  | 4.7077663E+01    |
| 0.5531                                                                    | 1.8080254E+00        | 1.7000000E+05              | 6.0902843E-02  | 7.4822900E+00  | 1.4316010E+00  | 4.7012615E+01    |
| 1 MSC.NASTRAN AEROELASTIC JOB CREATED ON 23-APR-17 AT 15:18:00            |                      |                            |                | APRIL 23, 2017 | MSC Nastran    | 7/ 3/15 PAGE 284 |
| _SEARCH_REGION_M = 0.5.SC1                                                |                      |                            |                |                |                |                  |

# Flutter Summary Results (Cont.)

|            |                                                              |                            |                          |                                             |                         |               |  |
|------------|--------------------------------------------------------------|----------------------------|--------------------------|---------------------------------------------|-------------------------|---------------|--|
| 0          | FLUTTER SUMMARY                                              |                            |                          |                                             |                         |               |  |
|            | CONFIGURATION = AEROSG2D                                     |                            | XY-SYMMETRY = ASYMMETRIC |                                             | XZ-SYMMETRY = SYMMETRIC |               |  |
| POINT = 36 | MACH NUMBER = 0.5000                                         | DENSITY RATIO = 8.2100E-01 | METHOD = PK              |                                             |                         |               |  |
| KFREQ      | 1./KFREQ                                                     | VELOCITY                   | DAMPING                  | FREQUENCY                                   | COMPLEX                 | EIGENVALUE    |  |
| 0.6093     | 1.6411460E+00                                                | 1.5800000E+05              | -2.0962011E-02           | 7.6612564E+00                               | -5.0452515E-01          | 4.8137093E+01 |  |
| 0.5997     | 1.6674862E+00                                                | 1.6000000E+05              | -1.3988743E-02           | 7.6356828E+00                               | -3.3556483E-01          | 4.7976410E+01 |  |
| 0.5903     | 1.6939574E+00                                                | 1.6200000E+05              | -6.2657775E-03           | 7.6103155E+00                               | -1.4980541E-01          | 4.7817023E+01 |  |
| 0.5812     | 1.7205253E+00                                                | 1.6400000E+05              | 2.2669116E-03            | 7.5853027E+00                               | 5.4020348E-02           | 4.7659863E+01 |  |
| 0.5724     | 1.7471427E+00                                                | 1.6600000E+05              | 1.1665802E-02            | 7.5608366E+00                               | 2.7709859E-01           | 4.7506137E+01 |  |
| 0.5638     | 1.7737413E+00                                                | 1.6800000E+05              | 2.1984915E-02            | 7.5371842E+00                               | 5.2057557E-01           | 4.7357525E+01 |  |
| 0.5555     | 1.8002302E+00                                                | 1.7000000E+05              | 3.3268862E-02            | 7.5146892E+00                               | 7.8541437E-01           | 4.7216185E+01 |  |
| 1          | MSC.NASTRAN AEROELASTIC JOB CREATED ON 23-APR-17 AT 15:18:00 |                            |                          | APRIL 23, 2017 MSC Nastran 7/ 3/15 PAGE 300 |                         |               |  |
|            | SEARCH REGION M = 0.5.SC1                                    |                            |                          |                                             |                         |               |  |

|   |                                                              |                      |                            |                |                         |                              |  |
|---|--------------------------------------------------------------|----------------------|----------------------------|----------------|-------------------------|------------------------------|--|
| 0 | FLUTTER SUMMARY                                              |                      |                            |                |                         |                              |  |
|   | CONFIGURATION = AEROSG2D                                     |                      | XY-SYMMETRY = ASYMMETRIC   |                | XZ-SYMMETRY = SYMMETRIC |                              |  |
|   | POINT = 52                                                   | MACH NUMBER = 0.5000 | DENSITY RATIO = 7.3500E-01 |                | METHOD = PK             |                              |  |
|   | KFREQ                                                        | 1./KFREQ             | VELOCITY                   | DAMPING        | FREQUENCY               | COMPLEX EIGENVALUE           |  |
|   | 0.6162                                                       | 1.6229435E+00        | 1.5800000E+05              | -2.0957627E-02 | 7.7471832E+00           | -5.1007709E-01 4.8676988E+01 |  |
|   | 0.6065                                                       | 1.6488471E+00        | 1.6000000E+05              | -1.6185377E-02 | 7.7219989E+00           | -3.9264713E-01 4.8518750E+01 |  |
|   | 0.5970                                                       | 1.6749990E+00        | 1.6200000E+05              | -1.0970217E-02 | 7.6964524E+00           | -2.6525017E-01 4.8358236E+01 |  |
|   | 0.5878                                                       | 1.7013963E+00        | 1.6400000E+05              | -5.2657724E-03 | 7.6705850E+00           | -1.2689381E-01 4.8195707E+01 |  |
|   | 0.5787                                                       | 1.7280464E+00        | 1.6600000E+05              | 9.6638755E-04  | 7.6443897E+00           | 2.3208337E-02 4.8031117E+01  |  |
|   | 0.5698                                                       | 1.7549510E+00        | 1.6800000E+05              | 7.7702443E-03  | 7.6178850E+00           | 1.8595975E-01 4.7864583E+01  |  |
|   | 0.5611                                                       | 1.7821028E+00        | 1.7000000E+05              | 1.5197353E-02  | 7.5911280E+00           | 3.6243001E-01 4.7696464E+01  |  |
| 1 | MSC.NASTRAN AEROELASTIC JOB CREATED ON 23-APR-17 AT 15:18:00 |                      |                            |                | APRIL 23, 2017          | MSC Nastran 7/ 3/15 PAGE 316 |  |
|   | SEARCH REGION M = 0.5.SC1                                    |                      |                            |                |                         |                              |  |

# Flutter Summary Results (Cont.)

|            |                                                              |                            |                         |                |                |               |          |
|------------|--------------------------------------------------------------|----------------------------|-------------------------|----------------|----------------|---------------|----------|
| 0          | FLUTTER SUMMARY                                              |                            |                         |                |                |               |          |
|            | CONFIGURATION = AEROSG2D                                     | XY-SYMMETRY = ASYMMETRIC   | XZ-SYMMETRY = SYMMETRIC |                |                |               |          |
| POINT = 68 | MACH NUMBER = 0.5000                                         | DENSITY RATIO = 6.6900E-01 | METHOD = PK             |                |                |               |          |
| KFREQ      | 1./KFREQ                                                     | VELOCITY                   | DAMPING                 | FREQUENCY      | COMPLEX        | EIGENVALUE    |          |
| 0.6217     | 1.6086065E+00                                                | 1.5800000E+05              | -1.8620466E-02          | 7.8162314E+00  | -4.5723328E-01 | 4.9110830E+01 |          |
| 0.6120     | 1.6339350E+00                                                | 1.6000000E+05              | -1.4969082E-02          | 7.7924735E+00  | -3.6645477E-01 | 4.8961555E+01 |          |
| 0.6026     | 1.6595200E+00                                                | 1.6200000E+05              | -1.1039229E-02          | 7.7682403E+00  | -2.6940848E-01 | 4.8809293E+01 |          |
| 0.5933     | 1.6853646E+00                                                | 1.6400000E+05              | -6.8000421E-03          | 7.7435504E+00  | -1.6542517E-01 | 4.8654162E+01 |          |
| 0.5843     | 1.7114832E+00                                                | 1.6600000E+05              | -2.2278344E-03          | 7.7183700E+00  | -5.4020471E-02 | 4.8495949E+01 |          |
| 0.5754     | 1.7378966E+00                                                | 1.6800000E+05              | 2.6982445E-03           | 7.6926411E+00  | 6.5208866E-02  | 4.8334290E+01 |          |
| 0.5667     | 1.7646238E+00                                                | 1.7000000E+05              | 8.0046355E-03           | 7.6663198E+00  | 1.9278728E-01  | 4.8168908E+01 |          |
| 1          | MSC.NASTRAN AEROELASTIC JOB CREATED ON 23-APR-17 AT 15:18:00 |                            |                         | APRIL 23, 2017 | MSC Nastran    | 7/ 3/15       | PAGE 332 |
|            | _SEARCH_REGION_M = _0.5.SC1                                  |                            |                         |                |                |               |          |

|            |                                                              |                            |                         |                |                |               |          |
|------------|--------------------------------------------------------------|----------------------------|-------------------------|----------------|----------------|---------------|----------|
| 0          | FLUTTER SUMMARY                                              |                            |                         |                |                |               |          |
|            | CONFIGURATION = AEROSG2D                                     | XY-SYMMETRY = ASYMMETRIC   | XZ-SYMMETRY = SYMMETRIC |                |                |               |          |
| POINT = 84 | MACH NUMBER = 0.5000                                         | DENSITY RATIO = 6.0100E-01 | METHOD = PK             |                |                |               |          |
| KFREQ      | 1./KFREQ                                                     | VELOCITY                   | DAMPING                 | FREQUENCY      | COMPLEX        | EIGENVALUE    |          |
| 0.6274     | 1.5938626E+00                                                | 1.5800000E+05              | -1.5050944E-02          | 7.8885349E+00  | -3.7300097E-01 | 4.9565126E+01 |          |
| 0.6178     | 1.6185327E+00                                                | 1.6000000E+05              | -1.2170379E-02          | 7.8666287E+00  | -3.0077561E-01 | 4.9427486E+01 |          |
| 0.6085     | 1.6434353E+00                                                | 1.6200000E+05              | -9.1223937E-03          | 7.8442700E+00  | -2.2480772E-01 | 4.9287002E+01 |          |
| 0.5993     | 1.6685762E+00                                                | 1.6400000E+05              | -5.8897903E-03          | 7.8214618E+00  | -1.4472302E-01 | 4.9143694E+01 |          |
| 0.5903     | 1.6939644E+00                                                | 1.6600000E+05              | -2.4562441E-03          | 7.7981923E+00  | -6.0174895E-02 | 4.8997487E+01 |          |
| 0.5815     | 1.7196209E+00                                                | 1.6800000E+05              | 1.1859860E-03           | 7.7743966E+00  | 2.8966507E-02  | 4.8847975E+01 |          |
| 0.5729     | 1.7455696E+00                                                | 1.7000000E+05              | 5.0448893E-03           | 7.7500035E+00  | 1.2282971E-01  | 4.8694708E+01 |          |
| 1          | MSC.NASTRAN AEROELASTIC JOB CREATED ON 23-APR-17 AT 15:18:00 |                            |                         | APRIL 23, 2017 | MSC Nastran    | 7/ 3/15       | PAGE 348 |
|            | _SEARCH_REGION_M = _0.5.SC1                                  |                            |                         |                |                |               |          |

# Flutter Mode Shape

|                                                                                                                 |               |               |                |                 |                |               |
|-----------------------------------------------------------------------------------------------------------------|---------------|---------------|----------------|-----------------|----------------|---------------|
| 0                                                                                                               |               |               |                |                 |                |               |
| FLUTTER SUMMARY                                                                                                 |               |               |                |                 |                |               |
| -----                                                                                                           |               |               |                |                 |                |               |
| CONFIGURATION = AEROSG2D      XY-SYMMETRY = ASYMMETRIC      XZ-SYMMETRY = SYMMETRIC                             |               |               |                |                 |                |               |
| -----                                                                                                           |               |               |                |                 |                |               |
| POINT =                                                                                                         | 52            | MACH NUMBER = | 0.5000         | DENSITY RATIO = | 7.3500E-01     | METHOD = PK   |
| -----                                                                                                           |               |               |                |                 |                |               |
| KFREQ                                                                                                           | 1./KFREQ      | VELOCITY      | DAMPING        | FREQUENCY       | COMPLEX        | EIGENVALUE    |
| 0.6162                                                                                                          | 1.6229435E+00 | 1.5800000E+05 | -2.0957627E-02 | 7.7471832E+00   | -5.1007709E-01 | 4.8676988E+01 |
| 0.6065                                                                                                          | 1.6488471E+00 | 1.6000000E+05 | -1.6185377E-02 | 7.7219989E+00   | -3.9264713E-01 | 4.8518750E+01 |
| 0.5970                                                                                                          | 1.6749990E+00 | 1.6200000E+05 | -1.0970217E-02 | 7.6964524E+00   | -2.6525017E-01 | 4.8358236E+01 |
| 0.5878                                                                                                          | 1.7013963E+00 | 1.6400000E+05 | -5.2657724E-03 | 7.6705850E+00   | -1.2689381E-01 | 4.8195707E+01 |
| 0.5787                                                                                                          | 1.7280464E+00 | 1.6600000E+05 | 9.6638755E-04  | 7.6443897E+00   | 2.3208337E-02  | 4.8031117E+01 |
| 0.5698                                                                                                          | 1.7549510E+00 | 1.6800000E+05 | 7.7702443E-03  | 7.6178850E+00   | 1.8595975E-01  | 4.7864583E+01 |
| 0.5611                                                                                                          | 1.7821028E+00 | 1.7000000E+05 | 1.5197353E-02  | 7.5911280E+00   | 3.6243001E-01  | 4.7696464E+01 |
| 1 MSC.NASTRAN AEROELASTIC JOB CREATED ON 23-APR-17 AT 15:18:00      APRIL 23, 2017 MSC Nastran 7/ 3/15 PAGE 320 |               |               |                |                 |                |               |
| _SEARCH_REGION_M=_0.5.SC1                                                                                       |               |               |                |                 |                |               |

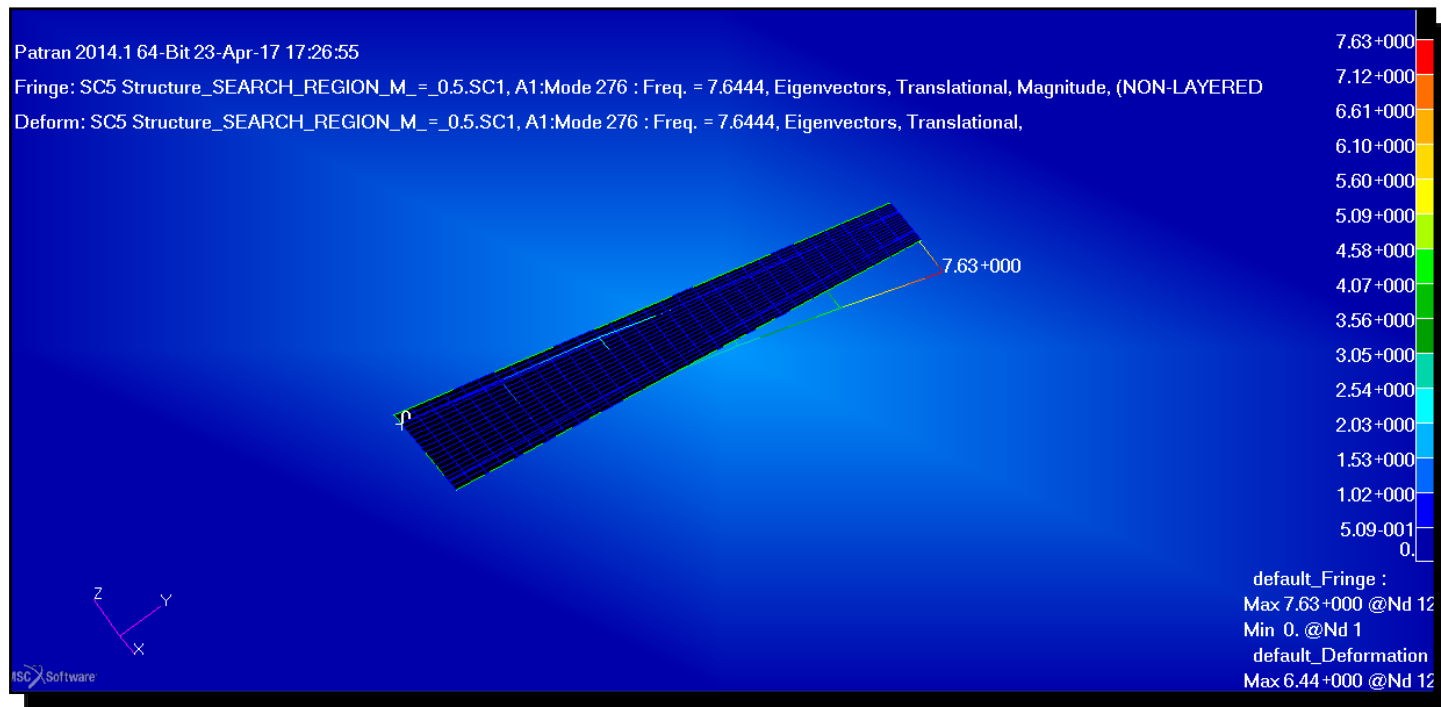

# Additional Runs to Get Flutter Boundary

- Matched point at  $M=0.5$  and  $Density=0.735$  identified by fitting the data point on the Flight envelope graph.
- To get flutter boundary more runs will be preformed at Mach numbers 0.46, 0.48, 0.52,0.54
- 4 more subcases need to be created within Patran at these Mach Numbers=0.46,0.48,0.52,0.54

# Setup for Mach Number - 0.46, 0.48, 0.52, 0.54

- Unsteady Aerodynamics

## Mach-0.46

| Mach No | Reduced Freq |
|---------|--------------|
| .46     | 0.2          |
| .46     | 0.5          |
| .46     | 0.6          |
| .46     | 0.7          |
| .46     | 1.0          |

## Mach-0.48

| Mach No | Reduced Freq |
|---------|--------------|
| .48     | 0.2          |
| .48     | 0.5          |
| .48     | 0.6          |
| .48     | 0.7          |
| .48     | 1.0          |

## Mach-0.52

| Mach No | Reduced Freq |
|---------|--------------|
| .52     | 0.2          |
| .52     | 0.5          |
| .52     | 0.6          |
| .52     | 0.7          |
| .52     | 1.0          |

## Mach-0.54

| Mach No | Reduced Freq |
|---------|--------------|
| .54     | 0.2          |
| .54     | 0.5          |
| .54     | 0.6          |
| .54     | 0.7          |
| .54     | 1.0          |

- The specific MKPAIR needs to be selected while setting up the Flutter subcase for the specific Mach number

# Generate Nastran Input File for All Mach Numbers

- In Job Parameters set the Analysis Type to Analysis Deck to Study the Input file

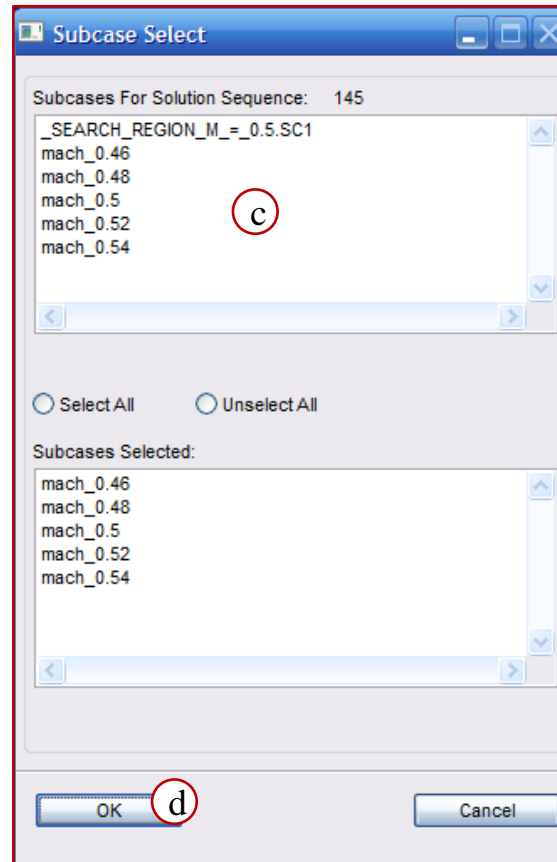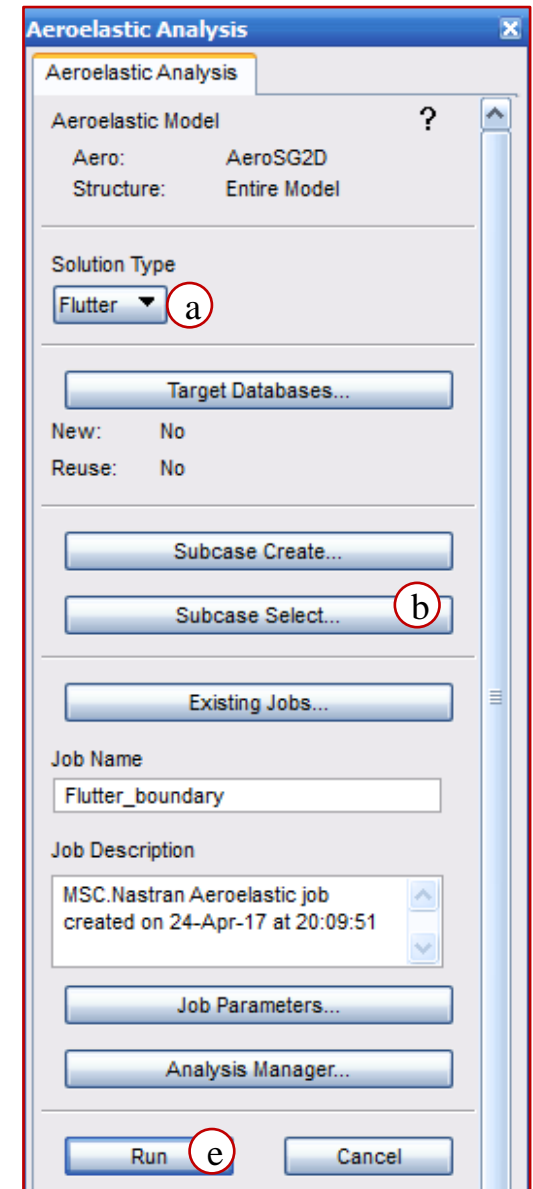

# Flutter Boundary

- The Flutter Summary for each Mach number is observed in f06 file.
- The EAS derived from the TAS at the specific air density is plotted on the graph to get the Flutter Boundary.
- The flutter analysis is repeated for intermediate Mach numbers to get specific values as shown in graph in next slide.

# Matched Point at M ~ 0.5

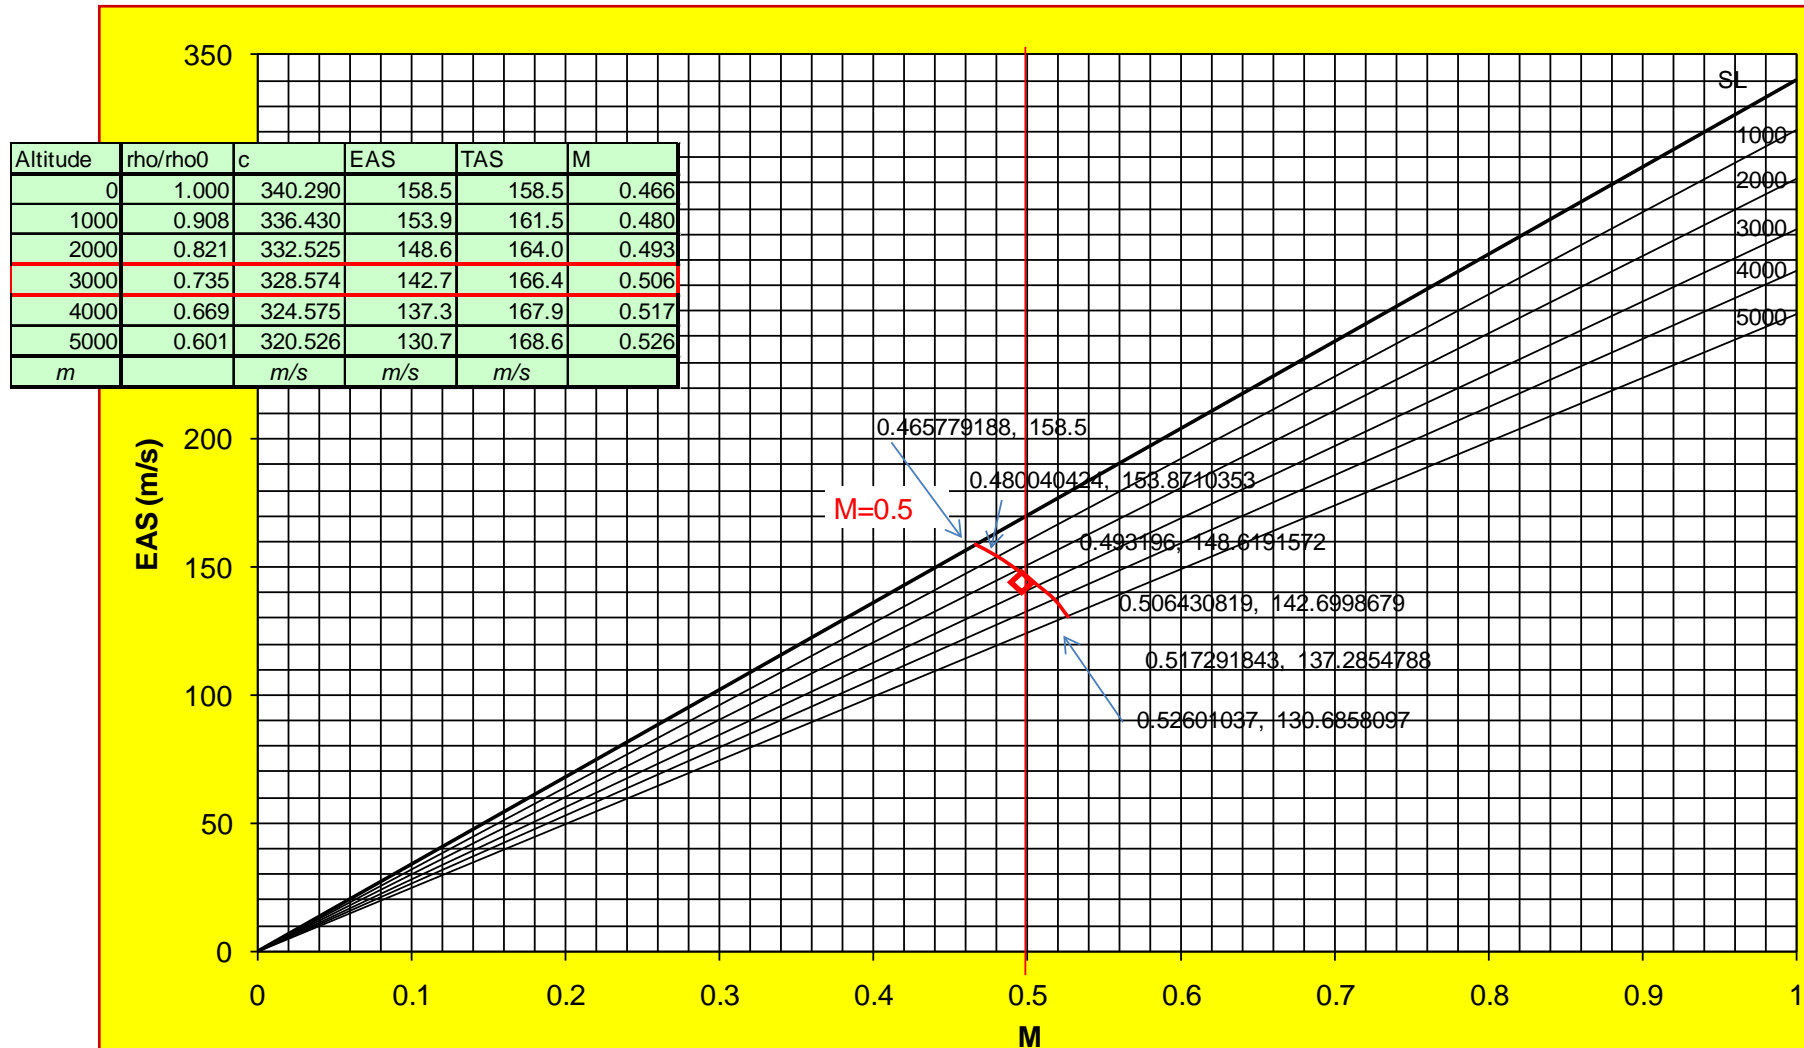

# Flutter Boundary

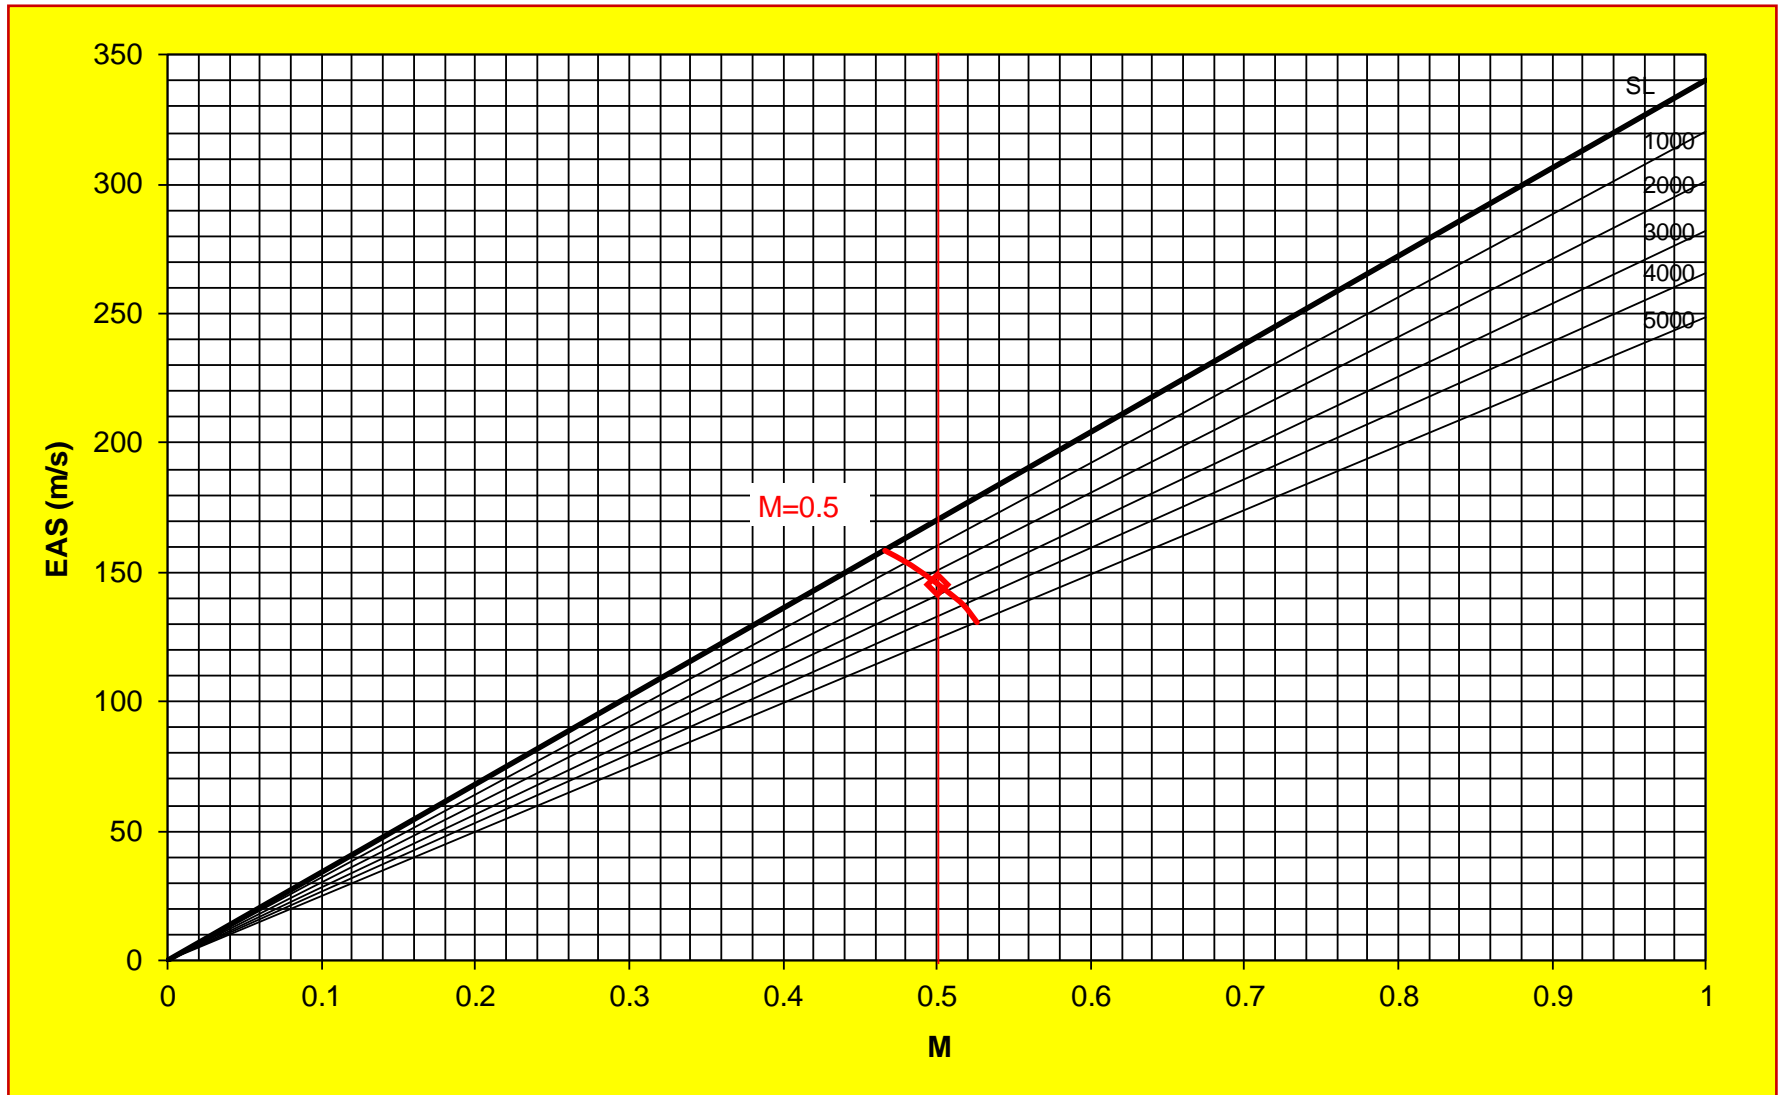

Supplement: f1 [file 5046395.f1.zip › WS_5_flutter_ws_swept_wing_april_2017.pdf]
