# Supplementary material for: Improving Aileron Effectiveness Based on Changing the Position of Aileron Connectors
Source: Hindawi journal article supplement (doi:10.1155/2019/5046395), 2019-06-04
Supplement: f1 [file 5046395.f1.zip]

Archive with 5 entries (5 files):
- background.pdf
- ban1.pdf
- beamtry6.pdf
- WS_2_antisymm_2017.pdf
- WS_5_flutter_ws_swept_wing_april_2017.pdf
