# Supplementary material for: Improving Aileron Effectiveness Based on Changing the Position of Aileron Connectors
Source: Hindawi journal article supplement (doi:10.1155/2019/5046395), 2019-06-04
Supplement: f1 [file 5046395.f1.zip › ban1.pdf]

```

SOL 101
CEND
$ Direct Text Input for Global Case Control Data
TITLE = MSC.Nastran job created on 12-May-18 at 14:14:49
ECHO = NONE
SUBCASE 1
$ Subcase name : load1
  SUBTITLE=load1
  SPC = 2
  LOAD = 3
  DISPLACEMENT(SORT1,REAL)=ALL
  SPCFORCES(SORT1,REAL)=ALL
  STRESS(SORT1,REAL,VONMISES,BILIN)=ALL
SUBCASE 2
$ Subcase name : load2
  SUBTITLE=load2
  SPC = 5
  LOAD = 5
  DISPLACEMENT(SORT1,REAL)=ALL
  SPCFORCES(SORT1,REAL)=ALL
  STRESS(SORT1,REAL,VONMISES,BILIN)=ALL
BEGIN BULK
param,bailout,-1
$ Direct Text Input for Bulk Data
PARAM      POST      0
PARAM      PRTMAXIM YES
$ Elements and Element Properties for region : pp
PSHELL    1          1          .001      1          1
$ Pset: "pp" will be imported as: "pshell.1"
CQUAD4    1          1          1          2          9          8
CQUAD4    2          1          2          3          10         9
CQUAD4    3          1          3          4          11        10
CQUAD4    4          1          4          5          12        11
CQUAD4    5          1          5          6          13        12
CQUAD4    6          1          6          7          14        13
CQUAD4    7          1          8          9          16        15
CQUAD4    8          1          9          10         17        16
CQUAD4    9          1          10         11         18        17
CQUAD4   10          1          11         12         19        18
CQUAD4   11          1          12         13         20        19
CQUAD4   12          1          13         14         21        20
CQUAD4   13          1          15         16         23        22
CQUAD4   14          1          16         17         24        23
CQUAD4   15          1          17         18         25        24

```

|        |    |   |    |    |    |    |
|--------|----|---|----|----|----|----|
| CQUAD4 | 16 | 1 | 18 | 19 | 26 | 25 |
| CQUAD4 | 17 | 1 | 19 | 20 | 27 | 26 |
| CQUAD4 | 18 | 1 | 20 | 21 | 28 | 27 |
| CQUAD4 | 19 | 1 | 22 | 23 | 30 | 29 |
| CQUAD4 | 20 | 1 | 23 | 24 | 31 | 30 |
| CQUAD4 | 21 | 1 | 24 | 25 | 32 | 31 |
| CQUAD4 | 22 | 1 | 25 | 26 | 33 | 32 |
| CQUAD4 | 23 | 1 | 26 | 27 | 34 | 33 |
| CQUAD4 | 24 | 1 | 27 | 28 | 35 | 34 |
| CQUAD4 | 25 | 1 | 29 | 30 | 37 | 36 |
| CQUAD4 | 26 | 1 | 30 | 31 | 38 | 37 |
| CQUAD4 | 27 | 1 | 31 | 32 | 39 | 38 |
| CQUAD4 | 28 | 1 | 32 | 33 | 40 | 39 |
| CQUAD4 | 29 | 1 | 33 | 34 | 41 | 40 |
| CQUAD4 | 30 | 1 | 34 | 35 | 42 | 41 |
| CQUAD4 | 31 | 1 | 36 | 37 | 44 | 43 |
| CQUAD4 | 32 | 1 | 37 | 38 | 45 | 44 |
| CQUAD4 | 33 | 1 | 38 | 39 | 46 | 45 |
| CQUAD4 | 34 | 1 | 39 | 40 | 47 | 46 |
| CQUAD4 | 35 | 1 | 40 | 41 | 48 | 47 |
| CQUAD4 | 36 | 1 | 41 | 42 | 49 | 48 |
| CQUAD4 | 37 | 1 | 43 | 44 | 51 | 50 |
| CQUAD4 | 38 | 1 | 44 | 45 | 52 | 51 |
| CQUAD4 | 39 | 1 | 45 | 46 | 53 | 52 |
| CQUAD4 | 40 | 1 | 46 | 47 | 54 | 53 |
| CQUAD4 | 41 | 1 | 47 | 48 | 55 | 54 |
| CQUAD4 | 42 | 1 | 48 | 49 | 56 | 55 |
| CQUAD4 | 43 | 1 | 50 | 51 | 58 | 57 |
| CQUAD4 | 44 | 1 | 51 | 52 | 59 | 58 |
| CQUAD4 | 45 | 1 | 52 | 53 | 60 | 59 |
| CQUAD4 | 46 | 1 | 53 | 54 | 61 | 60 |
| CQUAD4 | 47 | 1 | 54 | 55 | 62 | 61 |
| CQUAD4 | 48 | 1 | 55 | 56 | 63 | 62 |
| CQUAD4 | 49 | 1 | 57 | 58 | 65 | 64 |
| CQUAD4 | 50 | 1 | 58 | 59 | 66 | 65 |
| CQUAD4 | 51 | 1 | 59 | 60 | 67 | 66 |
| CQUAD4 | 52 | 1 | 60 | 61 | 68 | 67 |
| CQUAD4 | 53 | 1 | 61 | 62 | 69 | 68 |
| CQUAD4 | 54 | 1 | 62 | 63 | 70 | 69 |
| CQUAD4 | 55 | 1 | 64 | 65 | 72 | 71 |
| CQUAD4 | 56 | 1 | 65 | 66 | 73 | 72 |
| CQUAD4 | 57 | 1 | 66 | 67 | 74 | 73 |
| CQUAD4 | 58 | 1 | 67 | 68 | 75 | 74 |
| CQUAD4 | 59 | 1 | 68 | 69 | 76 | 75 |

|        |     |   |     |     |     |     |
|--------|-----|---|-----|-----|-----|-----|
| CQUAD4 | 60  | 1 | 69  | 70  | 77  | 76  |
| CQUAD4 | 61  | 1 | 71  | 72  | 79  | 78  |
| CQUAD4 | 62  | 1 | 72  | 73  | 80  | 79  |
| CQUAD4 | 63  | 1 | 73  | 74  | 81  | 80  |
| CQUAD4 | 64  | 1 | 74  | 75  | 82  | 81  |
| CQUAD4 | 65  | 1 | 75  | 76  | 83  | 82  |
| CQUAD4 | 66  | 1 | 76  | 77  | 84  | 83  |
| CQUAD4 | 67  | 1 | 78  | 79  | 86  | 85  |
| CQUAD4 | 68  | 1 | 79  | 80  | 87  | 86  |
| CQUAD4 | 69  | 1 | 80  | 81  | 88  | 87  |
| CQUAD4 | 70  | 1 | 81  | 82  | 89  | 88  |
| CQUAD4 | 71  | 1 | 82  | 83  | 90  | 89  |
| CQUAD4 | 72  | 1 | 83  | 84  | 91  | 90  |
| CQUAD4 | 73  | 1 | 93  | 94  | 101 | 100 |
| CQUAD4 | 74  | 1 | 94  | 95  | 102 | 101 |
| CQUAD4 | 75  | 1 | 95  | 96  | 103 | 102 |
| CQUAD4 | 76  | 1 | 96  | 97  | 104 | 103 |
| CQUAD4 | 77  | 1 | 97  | 98  | 105 | 104 |
| CQUAD4 | 78  | 1 | 98  | 99  | 106 | 105 |
| CQUAD4 | 79  | 1 | 100 | 101 | 108 | 107 |
| CQUAD4 | 80  | 1 | 101 | 102 | 109 | 108 |
| CQUAD4 | 81  | 1 | 102 | 103 | 110 | 109 |
| CQUAD4 | 82  | 1 | 103 | 104 | 111 | 110 |
| CQUAD4 | 83  | 1 | 104 | 105 | 112 | 111 |
| CQUAD4 | 84  | 1 | 105 | 106 | 113 | 112 |
| CQUAD4 | 85  | 1 | 107 | 108 | 115 | 114 |
| CQUAD4 | 86  | 1 | 108 | 109 | 116 | 115 |
| CQUAD4 | 87  | 1 | 109 | 110 | 117 | 116 |
| CQUAD4 | 88  | 1 | 110 | 111 | 118 | 117 |
| CQUAD4 | 89  | 1 | 111 | 112 | 119 | 118 |
| CQUAD4 | 90  | 1 | 112 | 113 | 120 | 119 |
| CQUAD4 | 91  | 1 | 114 | 115 | 122 | 121 |
| CQUAD4 | 92  | 1 | 115 | 116 | 123 | 122 |
| CQUAD4 | 93  | 1 | 116 | 117 | 124 | 123 |
| CQUAD4 | 94  | 1 | 117 | 118 | 125 | 124 |
| CQUAD4 | 95  | 1 | 118 | 119 | 126 | 125 |
| CQUAD4 | 96  | 1 | 119 | 120 | 127 | 126 |
| CQUAD4 | 97  | 1 | 121 | 122 | 129 | 128 |
| CQUAD4 | 98  | 1 | 122 | 123 | 130 | 129 |
| CQUAD4 | 99  | 1 | 123 | 124 | 131 | 130 |
| CQUAD4 | 100 | 1 | 124 | 125 | 132 | 131 |
| CQUAD4 | 101 | 1 | 125 | 126 | 133 | 132 |
| CQUAD4 | 102 | 1 | 126 | 127 | 134 | 133 |
| CQUAD4 | 103 | 1 | 128 | 129 | 136 | 135 |

|        |     |   |     |     |     |     |
|--------|-----|---|-----|-----|-----|-----|
| CQUAD4 | 104 | 1 | 129 | 130 | 137 | 136 |
| CQUAD4 | 105 | 1 | 130 | 131 | 138 | 137 |
| CQUAD4 | 106 | 1 | 131 | 132 | 139 | 138 |
| CQUAD4 | 107 | 1 | 132 | 133 | 140 | 139 |
| CQUAD4 | 108 | 1 | 133 | 134 | 141 | 140 |
| CQUAD4 | 109 | 1 | 135 | 136 | 143 | 142 |
| CQUAD4 | 110 | 1 | 136 | 137 | 144 | 143 |
| CQUAD4 | 111 | 1 | 137 | 138 | 145 | 144 |
| CQUAD4 | 112 | 1 | 138 | 139 | 146 | 145 |
| CQUAD4 | 113 | 1 | 139 | 140 | 147 | 146 |
| CQUAD4 | 114 | 1 | 140 | 141 | 148 | 147 |
| CQUAD4 | 115 | 1 | 142 | 143 | 150 | 149 |
| CQUAD4 | 116 | 1 | 143 | 144 | 151 | 150 |
| CQUAD4 | 117 | 1 | 144 | 145 | 152 | 151 |
| CQUAD4 | 118 | 1 | 145 | 146 | 153 | 152 |
| CQUAD4 | 119 | 1 | 146 | 147 | 154 | 153 |
| CQUAD4 | 120 | 1 | 147 | 148 | 155 | 154 |
| CQUAD4 | 121 | 1 | 149 | 150 | 157 | 156 |
| CQUAD4 | 122 | 1 | 150 | 151 | 158 | 157 |
| CQUAD4 | 123 | 1 | 151 | 152 | 159 | 158 |
| CQUAD4 | 124 | 1 | 152 | 153 | 160 | 159 |
| CQUAD4 | 125 | 1 | 153 | 154 | 161 | 160 |
| CQUAD4 | 126 | 1 | 154 | 155 | 162 | 161 |
| CQUAD4 | 127 | 1 | 156 | 157 | 164 | 163 |
| CQUAD4 | 128 | 1 | 157 | 158 | 165 | 164 |
| CQUAD4 | 129 | 1 | 158 | 159 | 166 | 165 |
| CQUAD4 | 130 | 1 | 159 | 160 | 167 | 166 |
| CQUAD4 | 131 | 1 | 160 | 161 | 168 | 167 |
| CQUAD4 | 132 | 1 | 161 | 162 | 169 | 168 |
| CQUAD4 | 133 | 1 | 163 | 164 | 171 | 170 |
| CQUAD4 | 134 | 1 | 164 | 165 | 172 | 171 |
| CQUAD4 | 135 | 1 | 165 | 166 | 173 | 172 |
| CQUAD4 | 136 | 1 | 166 | 167 | 174 | 173 |
| CQUAD4 | 137 | 1 | 167 | 168 | 175 | 174 |
| CQUAD4 | 138 | 1 | 168 | 169 | 176 | 175 |
| CQUAD4 | 139 | 1 | 170 | 171 | 178 | 177 |
| CQUAD4 | 140 | 1 | 171 | 172 | 179 | 178 |
| CQUAD4 | 141 | 1 | 172 | 173 | 180 | 179 |
| CQUAD4 | 142 | 1 | 173 | 174 | 181 | 180 |
| CQUAD4 | 143 | 1 | 174 | 175 | 182 | 181 |
| CQUAD4 | 144 | 1 | 175 | 176 | 183 | 182 |

\$ Referenced Material Records

\$ Material Record : mm

\$ Description of Material : Date: 12-May-18

Time: 14:01:13

MAT1      1      7.2+10      .3      2700.

\$ Multipoint Constraints of the Entire Model

\$ ID conflict : the PATRAN MPC ID was 1

|      |     |    |    |     |    |     |    |    |
|------|-----|----|----|-----|----|-----|----|----|
| RBE3 | 145 |    | 92 | 123 | 1. | 123 | 2  | 3  |
|      | 4   | 5  | 6  | 7   | 9  | 10  | 11 | 12 |
|      | 13  | 14 | 16 | 17  | 18 | 19  | 20 | 21 |
|      | 23  | 24 | 25 | 26  | 27 | 28  | 30 | 31 |
|      | 32  | 33 | 34 | 35  | 37 | 38  | 39 | 40 |
|      | 41  | 42 | 44 | 45  | 46 | 47  | 48 | 49 |
|      | 51  | 52 | 53 | 54  | 55 | 56  | 58 | 59 |
|      | 60  | 61 | 62 | 63  | 65 | 66  | 67 | 68 |
|      | 69  | 70 | 72 | 73  | 74 | 75  | 76 | 77 |
|      | 79  | 80 | 81 | 82  | 83 | 84  | 86 | 87 |
|      | 88  | 89 | 90 | 91  |    |     |    |    |

\$ ID conflict : the PATRAN MPC ID was 2

|      |     |     |     |     |     |     |     |     |
|------|-----|-----|-----|-----|-----|-----|-----|-----|
| RBE3 | 146 |     | 184 | 123 | 1.  | 123 | 94  | 95  |
|      | 96  | 97  | 98  | 99  | 101 | 102 | 103 | 104 |
|      | 105 | 106 | 108 | 109 | 110 | 111 | 112 | 113 |
|      | 115 | 116 | 117 | 118 | 119 | 120 | 122 | 123 |
|      | 124 | 125 | 126 | 127 | 129 | 130 | 131 | 132 |
|      | 133 | 134 | 136 | 137 | 138 | 139 | 140 | 141 |
|      | 143 | 144 | 145 | 146 | 147 | 148 | 150 | 151 |
|      | 152 | 153 | 154 | 155 | 157 | 158 | 159 | 160 |
|      | 161 | 162 | 164 | 165 | 166 | 167 | 168 | 169 |
|      | 171 | 172 | 173 | 174 | 175 | 176 | 178 | 179 |
|      | 180 | 181 | 182 | 183 |     |     |     |     |

\$ Nodes of the Entire Model

|      |    |  |    |    |    |
|------|----|--|----|----|----|
| GRID | 1  |  | 0. | 0. | 0. |
| GRID | 2  |  | 1. | 0. | 0. |
| GRID | 3  |  | 2. | 0. | 0. |
| GRID | 4  |  | 3. | 0. | 0. |
| GRID | 5  |  | 4. | 0. | 0. |
| GRID | 6  |  | 5. | 0. | 0. |
| GRID | 7  |  | 6. | 0. | 0. |
| GRID | 8  |  | 0. | 1. | 0. |
| GRID | 9  |  | 1. | 1. | 0. |
| GRID | 10 |  | 2. | 1. | 0. |
| GRID | 11 |  | 3. | 1. | 0. |
| GRID | 12 |  | 4. | 1. | 0. |
| GRID | 13 |  | 5. | 1. | 0. |
| GRID | 14 |  | 6. | 1. | 0. |
| GRID | 15 |  | 0. | 2. | 0. |
| GRID | 16 |  | 1. | 2. | 0. |
| GRID | 17 |  | 2. | 2. | 0. |

|      |    |    |    |    |
|------|----|----|----|----|
| GRID | 18 | 3. | 2. | 0. |
| GRID | 19 | 4. | 2. | 0. |
| GRID | 20 | 5. | 2. | 0. |
| GRID | 21 | 6. | 2. | 0. |
| GRID | 22 | 0. | 3. | 0. |
| GRID | 23 | 1. | 3. | 0. |
| GRID | 24 | 2. | 3. | 0. |
| GRID | 25 | 3. | 3. | 0. |
| GRID | 26 | 4. | 3. | 0. |
| GRID | 27 | 5. | 3. | 0. |
| GRID | 28 | 6. | 3. | 0. |
| GRID | 29 | 0. | 4. | 0. |
| GRID | 30 | 1. | 4. | 0. |
| GRID | 31 | 2. | 4. | 0. |
| GRID | 32 | 3. | 4. | 0. |
| GRID | 33 | 4. | 4. | 0. |
| GRID | 34 | 5. | 4. | 0. |
| GRID | 35 | 6. | 4. | 0. |
| GRID | 36 | 0. | 5. | 0. |
| GRID | 37 | 1. | 5. | 0. |
| GRID | 38 | 2. | 5. | 0. |
| GRID | 39 | 3. | 5. | 0. |
| GRID | 40 | 4. | 5. | 0. |
| GRID | 41 | 5. | 5. | 0. |
| GRID | 42 | 6. | 5. | 0. |
| GRID | 43 | 0. | 6. | 0. |
| GRID | 44 | 1. | 6. | 0. |
| GRID | 45 | 2. | 6. | 0. |
| GRID | 46 | 3. | 6. | 0. |
| GRID | 47 | 4. | 6. | 0. |
| GRID | 48 | 5. | 6. | 0. |
| GRID | 49 | 6. | 6. | 0. |
| GRID | 50 | 0. | 7. | 0. |
| GRID | 51 | 1. | 7. | 0. |
| GRID | 52 | 2. | 7. | 0. |
| GRID | 53 | 3. | 7. | 0. |
| GRID | 54 | 4. | 7. | 0. |
| GRID | 55 | 5. | 7. | 0. |
| GRID | 56 | 6. | 7. | 0. |
| GRID | 57 | 0. | 8. | 0. |
| GRID | 58 | 1. | 8. | 0. |
| GRID | 59 | 2. | 8. | 0. |
| GRID | 60 | 3. | 8. | 0. |
| GRID | 61 | 4. | 8. | 0. |

|      |     |     |     |      |
|------|-----|-----|-----|------|
| GRID | 62  | 5.  | 8.  | 0.   |
| GRID | 63  | 6.  | 8.  | 0.   |
| GRID | 64  | 0.  | 9.  | 0.   |
| GRID | 65  | 1.  | 9.  | 0.   |
| GRID | 66  | 2.  | 9.  | 0.   |
| GRID | 67  | 3.  | 9.  | 0.   |
| GRID | 68  | 4.  | 9.  | 0.   |
| GRID | 69  | 5.  | 9.  | 0.   |
| GRID | 70  | 6.  | 9.  | 0.   |
| GRID | 71  | 0.  | 10. | 0.   |
| GRID | 72  | 1.  | 10. | 0.   |
| GRID | 73  | 2.  | 10. | 0.   |
| GRID | 74  | 3.  | 10. | 0.   |
| GRID | 75  | 4.  | 10. | 0.   |
| GRID | 76  | 5.  | 10. | 0.   |
| GRID | 77  | 6.  | 10. | 0.   |
| GRID | 78  | 0.  | 11. | 0.   |
| GRID | 79  | 1.  | 11. | 0.   |
| GRID | 80  | 2.  | 11. | 0.   |
| GRID | 81  | 3.  | 11. | 0.   |
| GRID | 82  | 4.  | 11. | 0.   |
| GRID | 83  | 5.  | 11. | 0.   |
| GRID | 84  | 6.  | 11. | 0.   |
| GRID | 85  | 0.  | 12. | 0.   |
| GRID | 86  | 1.  | 12. | 0.   |
| GRID | 87  | 2.  | 12. | 0.   |
| GRID | 88  | 3.  | 12. | 0.   |
| GRID | 89  | 4.  | 12. | 0.   |
| GRID | 90  | 5.  | 12. | 0.   |
| GRID | 91  | 6.  | 12. | 0.   |
| GRID | 92  | 2.  | 8.  | .001 |
| GRID | 93  | 10. | 0.  | 0.   |
| GRID | 94  | 11. | 0.  | 0.   |
| GRID | 95  | 12. | 0.  | 0.   |
| GRID | 96  | 13. | 0.  | 0.   |
| GRID | 97  | 14. | 0.  | 0.   |
| GRID | 98  | 15. | 0.  | 0.   |
| GRID | 99  | 16. | 0.  | 0.   |
| GRID | 100 | 10. | 1.  | 0.   |
| GRID | 101 | 11. | 1.  | 0.   |
| GRID | 102 | 12. | 1.  | 0.   |
| GRID | 103 | 13. | 1.  | 0.   |
| GRID | 104 | 14. | 1.  | 0.   |
| GRID | 105 | 15. | 1.  | 0.   |

|      |     |     |    |    |
|------|-----|-----|----|----|
| GRID | 106 | 16. | 1. | 0. |
| GRID | 107 | 10. | 2. | 0. |
| GRID | 108 | 11. | 2. | 0. |
| GRID | 109 | 12. | 2. | 0. |
| GRID | 110 | 13. | 2. | 0. |
| GRID | 111 | 14. | 2. | 0. |
| GRID | 112 | 15. | 2. | 0. |
| GRID | 113 | 16. | 2. | 0. |
| GRID | 114 | 10. | 3. | 0. |
| GRID | 115 | 11. | 3. | 0. |
| GRID | 116 | 12. | 3. | 0. |
| GRID | 117 | 13. | 3. | 0. |
| GRID | 118 | 14. | 3. | 0. |
| GRID | 119 | 15. | 3. | 0. |
| GRID | 120 | 16. | 3. | 0. |
| GRID | 121 | 10. | 4. | 0. |
| GRID | 122 | 11. | 4. | 0. |
| GRID | 123 | 12. | 4. | 0. |
| GRID | 124 | 13. | 4. | 0. |
| GRID | 125 | 14. | 4. | 0. |
| GRID | 126 | 15. | 4. | 0. |
| GRID | 127 | 16. | 4. | 0. |
| GRID | 128 | 10. | 5. | 0. |
| GRID | 129 | 11. | 5. | 0. |
| GRID | 130 | 12. | 5. | 0. |
| GRID | 131 | 13. | 5. | 0. |
| GRID | 132 | 14. | 5. | 0. |
| GRID | 133 | 15. | 5. | 0. |
| GRID | 134 | 16. | 5. | 0. |
| GRID | 135 | 10. | 6. | 0. |
| GRID | 136 | 11. | 6. | 0. |
| GRID | 137 | 12. | 6. | 0. |
| GRID | 138 | 13. | 6. | 0. |
| GRID | 139 | 14. | 6. | 0. |
| GRID | 140 | 15. | 6. | 0. |
| GRID | 141 | 16. | 6. | 0. |
| GRID | 142 | 10. | 7. | 0. |
| GRID | 143 | 11. | 7. | 0. |
| GRID | 144 | 12. | 7. | 0. |
| GRID | 145 | 13. | 7. | 0. |
| GRID | 146 | 14. | 7. | 0. |
| GRID | 147 | 15. | 7. | 0. |
| GRID | 148 | 16. | 7. | 0. |
| GRID | 149 | 10. | 8. | 0. |

|      |     |     |     |      |
|------|-----|-----|-----|------|
| GRID | 150 | 11. | 8.  | 0.   |
| GRID | 151 | 12. | 8.  | 0.   |
| GRID | 152 | 13. | 8.  | 0.   |
| GRID | 153 | 14. | 8.  | 0.   |
| GRID | 154 | 15. | 8.  | 0.   |
| GRID | 155 | 16. | 8.  | 0.   |
| GRID | 156 | 10. | 9.  | 0.   |
| GRID | 157 | 11. | 9.  | 0.   |
| GRID | 158 | 12. | 9.  | 0.   |
| GRID | 159 | 13. | 9.  | 0.   |
| GRID | 160 | 14. | 9.  | 0.   |
| GRID | 161 | 15. | 9.  | 0.   |
| GRID | 162 | 16. | 9.  | 0.   |
| GRID | 163 | 10. | 10. | 0.   |
| GRID | 164 | 11. | 10. | 0.   |
| GRID | 165 | 12. | 10. | 0.   |
| GRID | 166 | 13. | 10. | 0.   |
| GRID | 167 | 14. | 10. | 0.   |
| GRID | 168 | 15. | 10. | 0.   |
| GRID | 169 | 16. | 10. | 0.   |
| GRID | 170 | 10. | 11. | 0.   |
| GRID | 171 | 11. | 11. | 0.   |
| GRID | 172 | 12. | 11. | 0.   |
| GRID | 173 | 13. | 11. | 0.   |
| GRID | 174 | 14. | 11. | 0.   |
| GRID | 175 | 15. | 11. | 0.   |
| GRID | 176 | 16. | 11. | 0.   |
| GRID | 177 | 10. | 12. | 0.   |
| GRID | 178 | 11. | 12. | 0.   |
| GRID | 179 | 12. | 12. | 0.   |
| GRID | 180 | 13. | 12. | 0.   |
| GRID | 181 | 14. | 12. | 0.   |
| GRID | 182 | 15. | 12. | 0.   |
| GRID | 183 | 16. | 12. | 0.   |
| GRID | 184 | 12. | 8.  | .001 |

\$ Loads for Load Case : load1

SPCADD 2 1 3

LOAD 3 1. 1. 2

\$ Displacement Constraints of Load Set : fix1

SPC1 1 123456 71

\$ Displacement Constraints of Load Set : fix2

SPC1 3 3456 15

\$ Loads for Load Case : load2

SPCADD 5 4 6

```

LOAD      5      1.      1.      1
$ Displacement Constraints of Load Set : fix3
SPC1      4      123456  149
$ Displacement Constraints of Load Set : fix4
SPC1      6      3456   121
$ Nodal Forces of Load Set : ff
FORCE     2      92      0      80000.  0.      0.      1.
$ Nodal Forces of Load Set : ff.1
FORCE     1      184     1      80000.  0.      0.      1.
$ Referenced Coordinate Frames
CORD2R    1      10.     0.      0.      10.     0.      10.
          20.     0.      0.
ENDDATA ef595edf

```
