# Supplementary material for: Improving Aileron Effectiveness Based on Changing the Position of Aileron Connectors
Source: Hindawi journal article supplement (doi:10.1155/2019/5046395), 2019-06-04
Supplement: f1 [file 5046395.f1.zip › beamtry6.pdf]

SOL 101

CEND

\$ Direct Text Input for Global Case Control Data

TITLE = MSC.Nastran job created on 31-Aug-16 at 09:24:01

ECHO = NONE

SUBCASE 1

\$ Subcase name : load

SUBTITLE=load

SPC = 2

LOAD = 2

DISPLACEMENT(SORT1,REAL)=ALL

SPCFORCES(SORT1,REAL)=ALL

STRESS(SORT1,REAL,VONMISES,BILIN)=ALL

SUBCASE 2

\$ Subcase name : load\_1

SUBTITLE=load\_1

SPC = 4

LOAD = 5

DISPLACEMENT(SORT1,REAL)=ALL

SPCFORCES(SORT1,REAL)=ALL

STRESS(SORT1,REAL,VONMISES,BILIN)=ALL

BEGIN BULK

\$ Direct Text Input for Bulk Data

param,bailout,-1

PARAM POST 0

PARAM PRTMAXIM YES

\$ Elements and Element Properties for region : pp

PBARL 1 1 ROD  
.00529

\$ Pset: "pp" will be imported as: "pbarl.1"

|      |    |   |    |    |    |    |    |
|------|----|---|----|----|----|----|----|
| CBAR | 1  | 1 | 1  | 2  | 0. | 1. | 0. |
| CBAR | 2  | 1 | 2  | 3  | 0. | 1. | 0. |
| CBAR | 3  | 1 | 3  | 4  | 0. | 1. | 0. |
| CBAR | 4  | 1 | 4  | 5  | 0. | 1. | 0. |
| CBAR | 5  | 1 | 5  | 6  | 0. | 1. | 0. |
| CBAR | 6  | 1 | 6  | 7  | 0. | 1. | 0. |
| CBAR | 7  | 1 | 7  | 8  | 0. | 1. | 0. |
| CBAR | 8  | 1 | 8  | 9  | 0. | 1. | 0. |
| CBAR | 9  | 1 | 9  | 10 | 0. | 1. | 0. |
| CBAR | 10 | 1 | 10 | 11 | 0. | 1. | 0. |
| CBAR | 11 | 1 | 11 | 12 | 0. | 1. | 0. |
| CBAR | 12 | 1 | 12 | 13 | 0. | 1. | 0. |
| CBAR | 13 | 1 | 13 | 14 | 0. | 1. | 0. |
| CBAR | 14 | 1 | 14 | 15 | 0. | 1. | 0. |

|      |    |   |    |    |    |    |    |
|------|----|---|----|----|----|----|----|
| CBAR | 15 | 1 | 15 | 16 | 0. | 1. | 0. |
| CBAR | 16 | 1 | 16 | 17 | 0. | 1. | 0. |
| CBAR | 17 | 1 | 17 | 18 | 0. | 1. | 0. |
| CBAR | 18 | 1 | 18 | 19 | 0. | 1. | 0. |
| CBAR | 19 | 1 | 19 | 20 | 0. | 1. | 0. |
| CBAR | 20 | 1 | 20 | 21 | 0. | 1. | 0. |
| CBAR | 21 | 1 | 21 | 23 | 0. | 1. | 0. |
| CBAR | 22 | 1 | 23 | 24 | 0. | 1. | 0. |
| CBAR | 23 | 1 | 24 | 25 | 0. | 1. | 0. |
| CBAR | 24 | 1 | 25 | 26 | 0. | 1. | 0. |
| CBAR | 25 | 1 | 26 | 27 | 0. | 1. | 0. |
| CBAR | 26 | 1 | 27 | 28 | 0. | 1. | 0. |
| CBAR | 27 | 1 | 28 | 29 | 0. | 1. | 0. |
| CBAR | 28 | 1 | 29 | 30 | 0. | 1. | 0. |
| CBAR | 29 | 1 | 30 | 31 | 0. | 1. | 0. |
| CBAR | 30 | 1 | 31 | 32 | 0. | 1. | 0. |
| CBAR | 31 | 1 | 32 | 33 | 0. | 1. | 0. |
| CBAR | 32 | 1 | 33 | 34 | 0. | 1. | 0. |
| CBAR | 33 | 1 | 34 | 35 | 0. | 1. | 0. |
| CBAR | 34 | 1 | 35 | 36 | 0. | 1. | 0. |
| CBAR | 35 | 1 | 36 | 37 | 0. | 1. | 0. |
| CBAR | 36 | 1 | 37 | 38 | 0. | 1. | 0. |
| CBAR | 37 | 1 | 38 | 39 | 0. | 1. | 0. |
| CBAR | 38 | 1 | 39 | 40 | 0. | 1. | 0. |
| CBAR | 39 | 1 | 40 | 41 | 0. | 1. | 0. |
| CBAR | 40 | 1 | 41 | 42 | 0. | 1. | 0. |
| CBAR | 41 | 1 | 42 | 43 | 0. | 1. | 0. |
| CBAR | 42 | 1 | 43 | 44 | 0. | 1. | 0. |
| CBAR | 43 | 1 | 44 | 45 | 0. | 1. | 0. |
| CBAR | 44 | 1 | 45 | 46 | 0. | 1. | 0. |
| CBAR | 45 | 1 | 46 | 47 | 0. | 1. | 0. |
| CBAR | 46 | 1 | 47 | 48 | 0. | 1. | 0. |
| CBAR | 47 | 1 | 48 | 49 | 0. | 1. | 0. |
| CBAR | 48 | 1 | 49 | 50 | 0. | 1. | 0. |
| CBAR | 49 | 1 | 50 | 51 | 0. | 1. | 0. |
| CBAR | 50 | 1 | 51 | 52 | 0. | 1. | 0. |
| CBAR | 51 | 1 | 52 | 53 | 0. | 1. | 0. |
| CBAR | 52 | 1 | 53 | 54 | 0. | 1. | 0. |
| CBAR | 53 | 1 | 54 | 55 | 0. | 1. | 0. |
| CBAR | 54 | 1 | 55 | 56 | 0. | 1. | 0. |
| CBAR | 55 | 1 | 56 | 57 | 0. | 1. | 0. |
| CBAR | 56 | 1 | 57 | 58 | 0. | 1. | 0. |
| CBAR | 57 | 1 | 58 | 59 | 0. | 1. | 0. |
| CBAR | 58 | 1 | 59 | 60 | 0. | 1. | 0. |

|      |    |   |    |    |    |    |    |
|------|----|---|----|----|----|----|----|
| CBAR | 59 | 1 | 60 | 61 | 0. | 1. | 0. |
| CBAR | 60 | 1 | 61 | 62 | 0. | 1. | 0. |

\$ Elements and Element Properties for region : pp\_1

|       |   |   |     |
|-------|---|---|-----|
| PBARL | 2 | 1 | ROD |
|-------|---|---|-----|

.006

\$ Pset: "pp\_1" will be imported as: "pbarl.2"

|      |    |   |     |     |    |    |    |
|------|----|---|-----|-----|----|----|----|
| CBAR | 61 | 2 | 63  | 64  | 0. | 1. | 0. |
| CBAR | 62 | 2 | 64  | 65  | 0. | 1. | 0. |
| CBAR | 63 | 2 | 65  | 66  | 0. | 1. | 0. |
| CBAR | 64 | 2 | 66  | 67  | 0. | 1. | 0. |
| CBAR | 65 | 2 | 67  | 68  | 0. | 1. | 0. |
| CBAR | 66 | 2 | 68  | 69  | 0. | 1. | 0. |
| CBAR | 67 | 2 | 69  | 70  | 0. | 1. | 0. |
| CBAR | 68 | 2 | 70  | 71  | 0. | 1. | 0. |
| CBAR | 69 | 2 | 71  | 72  | 0. | 1. | 0. |
| CBAR | 70 | 2 | 72  | 73  | 0. | 1. | 0. |
| CBAR | 71 | 2 | 73  | 74  | 0. | 1. | 0. |
| CBAR | 72 | 2 | 74  | 75  | 0. | 1. | 0. |
| CBAR | 73 | 2 | 75  | 76  | 0. | 1. | 0. |
| CBAR | 74 | 2 | 76  | 77  | 0. | 1. | 0. |
| CBAR | 75 | 2 | 77  | 78  | 0. | 1. | 0. |
| CBAR | 76 | 2 | 78  | 79  | 0. | 1. | 0. |
| CBAR | 77 | 2 | 79  | 80  | 0. | 1. | 0. |
| CBAR | 78 | 2 | 80  | 81  | 0. | 1. | 0. |
| CBAR | 79 | 2 | 81  | 82  | 0. | 1. | 0. |
| CBAR | 80 | 2 | 82  | 83  | 0. | 1. | 0. |
| CBAR | 81 | 2 | 83  | 84  | 0. | 1. | 0. |
| CBAR | 82 | 2 | 84  | 85  | 0. | 1. | 0. |
| CBAR | 83 | 2 | 85  | 86  | 0. | 1. | 0. |
| CBAR | 84 | 2 | 86  | 87  | 0. | 1. | 0. |
| CBAR | 85 | 2 | 87  | 88  | 0. | 1. | 0. |
| CBAR | 86 | 2 | 88  | 89  | 0. | 1. | 0. |
| CBAR | 87 | 2 | 89  | 90  | 0. | 1. | 0. |
| CBAR | 88 | 2 | 90  | 91  | 0. | 1. | 0. |
| CBAR | 89 | 2 | 91  | 92  | 0. | 1. | 0. |
| CBAR | 90 | 2 | 92  | 93  | 0. | 1. | 0. |
| CBAR | 91 | 2 | 93  | 94  | 0. | 1. | 0. |
| CBAR | 92 | 2 | 94  | 95  | 0. | 1. | 0. |
| CBAR | 93 | 2 | 95  | 96  | 0. | 1. | 0. |
| CBAR | 94 | 2 | 96  | 97  | 0. | 1. | 0. |
| CBAR | 95 | 2 | 97  | 98  | 0. | 1. | 0. |
| CBAR | 96 | 2 | 98  | 99  | 0. | 1. | 0. |
| CBAR | 97 | 2 | 99  | 100 | 0. | 1. | 0. |
| CBAR | 98 | 2 | 100 | 101 | 0. | 1. | 0. |

|      |     |   |     |     |    |    |    |
|------|-----|---|-----|-----|----|----|----|
| CBAR | 99  | 2 | 101 | 102 | 0. | 1. | 0. |
| CBAR | 100 | 2 | 102 | 103 | 0. | 1. | 0. |
| CBAR | 101 | 2 | 103 | 104 | 0. | 1. | 0. |
| CBAR | 102 | 2 | 104 | 105 | 0. | 1. | 0. |
| CBAR | 103 | 2 | 105 | 106 | 0. | 1. | 0. |
| CBAR | 104 | 2 | 106 | 107 | 0. | 1. | 0. |
| CBAR | 105 | 2 | 107 | 108 | 0. | 1. | 0. |
| CBAR | 106 | 2 | 108 | 109 | 0. | 1. | 0. |
| CBAR | 107 | 2 | 109 | 110 | 0. | 1. | 0. |
| CBAR | 108 | 2 | 110 | 111 | 0. | 1. | 0. |
| CBAR | 109 | 2 | 111 | 112 | 0. | 1. | 0. |
| CBAR | 110 | 2 | 112 | 113 | 0. | 1. | 0. |
| CBAR | 111 | 2 | 113 | 114 | 0. | 1. | 0. |
| CBAR | 112 | 2 | 114 | 115 | 0. | 1. | 0. |
| CBAR | 113 | 2 | 115 | 116 | 0. | 1. | 0. |
| CBAR | 114 | 2 | 116 | 117 | 0. | 1. | 0. |
| CBAR | 115 | 2 | 117 | 118 | 0. | 1. | 0. |
| CBAR | 116 | 2 | 118 | 119 | 0. | 1. | 0. |
| CBAR | 117 | 2 | 119 | 120 | 0. | 1. | 0. |
| CBAR | 118 | 2 | 120 | 121 | 0. | 1. | 0. |
| CBAR | 119 | 2 | 121 | 122 | 0. | 1. | 0. |
| CBAR | 120 | 2 | 122 | 123 | 0. | 1. | 0. |

\$ Referenced Material Records

\$ Material Record : steel

\$ Description of Material : Date: 31-Aug-16

Time: 09:12:41

MAT1 1 2.1+11 .3 7800.

\$ Nodes of the Entire Model

|       |    |      |    |                     |
|-------|----|------|----|---------------------|
| GRID  | 1  | -1.  | 0. | 0.                  |
| GRID* | 2  |      |    | -.94999998807907 0. |
| *     | 0. |      |    |                     |
| GRID* | 3  |      |    | -.89999997615814 0. |
| *     | 0. |      |    |                     |
| GRID* | 4  |      |    | -.85000002384185 0. |
| *     | 0. |      |    |                     |
| GRID* | 5  |      |    | -.80000001192092 0. |
| *     | 0. |      |    |                     |
| GRID  | 6  | -.75 | 0. | 0.                  |
| GRID* | 7  |      |    | -.69999998807907 0. |
| *     | 0. |      |    |                     |
| GRID* | 8  |      |    | -.65000003576278 0. |
| *     | 0. |      |    |                     |
| GRID* | 9  |      |    | -.60000002384185 0. |
| *     | 0. |      |    |                     |
| GRID* | 10 |      |    | -.55000001192092 0. |

|       |    |      |    |                     |
|-------|----|------|----|---------------------|
| *     | 0. |      |    |                     |
| GRID  | 11 | -.5  | 0. | 0.                  |
| GRID* | 12 |      |    | -.44999998807907 0. |
| *     | 0. |      |    |                     |
| GRID* | 13 |      |    | -.39999997615814 0. |
| *     | 0. |      |    |                     |
| GRID* | 14 |      |    | -.35000002384185 0. |
| *     | 0. |      |    |                     |
| GRID* | 15 |      |    | -.30000001192092 0. |
| *     | 0. |      |    |                     |
| GRID  | 16 | -.25 | 0. | 0.                  |
| GRID* | 17 |      |    | -.19999998807907 0. |
| *     | 0. |      |    |                     |
| GRID* | 18 |      |    | -.14999997615814 0. |
| *     | 0. |      |    |                     |
| GRID* | 19 |      |    | -.10000002384185 0. |
| *     | 0. |      |    |                     |
| GRID* | 20 |      |    | -.05000001192092 0. |
| *     | 0. |      |    |                     |
| GRID  | 21 | 0.   | 0. | 0.                  |
| GRID* | 23 |      |    | .050000000745058 0. |
| *     | 0. |      |    |                     |
| GRID* | 24 |      |    | .100000001490116 0. |
| *     | 0. |      |    |                     |
| GRID* | 25 |      |    | .150000005960465 0. |
| *     | 0. |      |    |                     |
| GRID* | 26 |      |    | .200000002980232 0. |
| *     | 0. |      |    |                     |
| GRID  | 27 | .25  | 0. | 0.                  |
| GRID* | 28 |      |    | .300000011920929 0. |
| *     | 0. |      |    |                     |
| GRID* | 29 |      |    | .349999994039536 0. |
| *     | 0. |      |    |                     |
| GRID* | 30 |      |    | .400000005960465 0. |
| *     | 0. |      |    |                     |
| GRID* | 31 |      |    | .449999988079071 0. |
| *     | 0. |      |    |                     |
| GRID  | 32 | .5   | 0. | 0.                  |
| GRID* | 33 |      |    | .550000011920929 0. |
| *     | 0. |      |    |                     |
| GRID* | 34 |      |    | .600000023841858 0. |
| *     | 0. |      |    |                     |
| GRID* | 35 |      |    | .649999976158142 0. |
| *     | 0. |      |    |                     |

|       |    |      |    |                     |
|-------|----|------|----|---------------------|
| GRID* | 36 |      |    | .699999988079071 0. |
| *     | 0. |      |    |                     |
| GRID  | 37 | .75  | 0. | 0.                  |
| GRID* | 38 |      |    | .800000011920929 0. |
| *     | 0. |      |    |                     |
| GRID* | 39 |      |    | .850000023841858 0. |
| *     | 0. |      |    |                     |
| GRID* | 40 |      |    | .899999976158142 0. |
| *     | 0. |      |    |                     |
| GRID* | 41 |      |    | .949999988079071 0. |
| *     | 0. |      |    |                     |
| GRID  | 42 | 1.   | 0. | 0.                  |
| GRID* | 43 |      |    | 1.04999995231628 0. |
| *     | 0. |      |    |                     |
| GRID* | 44 |      |    | 1.10000002384186 0. |
| *     | 0. |      |    |                     |
| GRID* | 45 |      |    | 1.14999997615814 0. |
| *     | 0. |      |    |                     |
| GRID* | 46 |      |    | 1.20000004768372 0. |
| *     | 0. |      |    |                     |
| GRID  | 47 | 1.25 | 0. | 0.                  |
| GRID* | 48 |      |    | 1.29999995231628 0. |
| *     | 0. |      |    |                     |
| GRID* | 49 |      |    | 1.35000002384186 0. |
| *     | 0. |      |    |                     |
| GRID* | 50 |      |    | 1.39999997615814 0. |
| *     | 0. |      |    |                     |
| GRID* | 51 |      |    | 1.45000004768372 0. |
| *     | 0. |      |    |                     |
| GRID  | 52 | 1.5  | 0. | 0.                  |
| GRID* | 53 |      |    | 1.54999995231628 0. |
| *     | 0. |      |    |                     |
| GRID* | 54 |      |    | 1.60000002384186 0. |
| *     | 0. |      |    |                     |
| GRID* | 55 |      |    | 1.64999997615814 0. |
| *     | 0. |      |    |                     |
| GRID* | 56 |      |    | 1.70000004768372 0. |
| *     | 0. |      |    |                     |
| GRID  | 57 | 1.75 | 0. | 0.                  |
| GRID* | 58 |      |    | 1.79999995231628 0. |
| *     | 0. |      |    |                     |
| GRID* | 59 |      |    | 1.85000002384186 0. |
| *     | 0. |      |    |                     |
| GRID* | 60 |      |    | 1.89999997615814 0. |

|       |    |      |    |                     |
|-------|----|------|----|---------------------|
| *     | 0. |      |    |                     |
| GRID* | 61 |      |    | 1.95000004768372 0. |
| *     | 0. |      |    |                     |
| GRID  | 62 | 2.   | 0. | 0.                  |
| GRID  | 63 | -1.  | 1. | 0.                  |
| GRID* | 64 |      |    | -.949999988079071.  |
| *     | 0. |      |    |                     |
| GRID* | 65 |      |    | -.899999976158141.  |
| *     | 0. |      |    |                     |
| GRID* | 66 |      |    | -.850000023841851.  |
| *     | 0. |      |    |                     |
| GRID* | 67 |      |    | -.800000011920921.  |
| *     | 0. |      |    |                     |
| GRID  | 68 | -.75 | 1. | 0.                  |
| GRID* | 69 |      |    | -.699999988079071.  |
| *     | 0. |      |    |                     |
| GRID* | 70 |      |    | -.650000035762781.  |
| *     | 0. |      |    |                     |
| GRID* | 71 |      |    | -.600000023841851.  |
| *     | 0. |      |    |                     |
| GRID* | 72 |      |    | -.550000011920921.  |
| *     | 0. |      |    |                     |
| GRID  | 73 | -.5  | 1. | 0.                  |
| GRID* | 74 |      |    | -.449999988079071.  |
| *     | 0. |      |    |                     |
| GRID* | 75 |      |    | -.399999976158141.  |
| *     | 0. |      |    |                     |
| GRID* | 76 |      |    | -.350000023841851.  |
| *     | 0. |      |    |                     |
| GRID* | 77 |      |    | -.300000011920921.  |
| *     | 0. |      |    |                     |
| GRID  | 78 | -.25 | 1. | 0.                  |
| GRID* | 79 |      |    | -.199999988079071.  |
| *     | 0. |      |    |                     |
| GRID* | 80 |      |    | -.149999976158141.  |
| *     | 0. |      |    |                     |
| GRID* | 81 |      |    | -.100000023841851.  |
| *     | 0. |      |    |                     |
| GRID* | 82 |      |    | -.050000011920921.  |
| *     | 0. |      |    |                     |
| GRID  | 83 | 0.   | 1. | 0.                  |
| GRID* | 84 |      |    | .0500000007450581.  |
| *     | 0. |      |    |                     |
| GRID* | 85 |      |    | .1000000014901161.  |

|       |     |      |    |                    |
|-------|-----|------|----|--------------------|
| *     | 0.  |      |    |                    |
| GRID* | 86  |      |    | .1500000059604651. |
| *     | 0.  |      |    |                    |
| GRID* | 87  |      |    | .2000000029802321. |
| *     | 0.  |      |    |                    |
| GRID  | 88  | .25  | 1. | 0.                 |
| GRID* | 89  |      |    | .3000000119209291. |
| *     | 0.  |      |    |                    |
| GRID* | 90  |      |    | .3499999940395361. |
| *     | 0.  |      |    |                    |
| GRID* | 91  |      |    | .4000000059604651. |
| *     | 0.  |      |    |                    |
| GRID* | 92  |      |    | .4499999880790711. |
| *     | 0.  |      |    |                    |
| GRID  | 93  | .5   | 1. | 0.                 |
| GRID* | 94  |      |    | .5500000119209291. |
| *     | 0.  |      |    |                    |
| GRID* | 95  |      |    | .6000000238418581. |
| *     | 0.  |      |    |                    |
| GRID* | 96  |      |    | .6499999761581421. |
| *     | 0.  |      |    |                    |
| GRID* | 97  |      |    | .6999999880790711. |
| *     | 0.  |      |    |                    |
| GRID  | 98  | .75  | 1. | 0.                 |
| GRID* | 99  |      |    | .8000000119209291. |
| *     | 0.  |      |    |                    |
| GRID* | 100 |      |    | .8500000238418581. |
| *     | 0.  |      |    |                    |
| GRID* | 101 |      |    | .8999999761581421. |
| *     | 0.  |      |    |                    |
| GRID* | 102 |      |    | .9499999880790711. |
| *     | 0.  |      |    |                    |
| GRID  | 103 | 1.   | 1. | 0.                 |
| GRID* | 104 |      |    | 1.049999952316281. |
| *     | 0.  |      |    |                    |
| GRID* | 105 |      |    | 1.100000023841861. |
| *     | 0.  |      |    |                    |
| GRID* | 106 |      |    | 1.149999976158141. |
| *     | 0.  |      |    |                    |
| GRID* | 107 |      |    | 1.200000047683721. |
| *     | 0.  |      |    |                    |
| GRID  | 108 | 1.25 | 1. | 0.                 |
| GRID* | 109 |      |    | 1.299999952316281. |
| *     | 0.  |      |    |                    |

|       |     |      |    |  |  |    |                    |
|-------|-----|------|----|--|--|----|--------------------|
| GRID* | 110 |      |    |  |  |    | 1.350000023841861. |
| *     | 0.  |      |    |  |  |    |                    |
| GRID* | 111 |      |    |  |  |    | 1.399999976158141. |
| *     | 0.  |      |    |  |  |    |                    |
| GRID* | 112 |      |    |  |  |    | 1.450000047683721. |
| *     | 0.  |      |    |  |  |    |                    |
| GRID  | 113 | 1.5  | 1. |  |  | 0. |                    |
| GRID* | 114 |      |    |  |  |    | 1.549999952316281. |
| *     | 0.  |      |    |  |  |    |                    |
| GRID* | 115 |      |    |  |  |    | 1.600000023841861. |
| *     | 0.  |      |    |  |  |    |                    |
| GRID* | 116 |      |    |  |  |    | 1.649999976158141. |
| *     | 0.  |      |    |  |  |    |                    |
| GRID* | 117 |      |    |  |  |    | 1.700000047683721. |
| *     | 0.  |      |    |  |  |    |                    |
| GRID  | 118 | 1.75 | 1. |  |  | 0. |                    |
| GRID* | 119 |      |    |  |  |    | 1.799999952316281. |
| *     | 0.  |      |    |  |  |    |                    |
| GRID* | 120 |      |    |  |  |    | 1.850000023841861. |
| *     | 0.  |      |    |  |  |    |                    |
| GRID* | 121 |      |    |  |  |    | 1.899999976158141. |
| *     | 0.  |      |    |  |  |    |                    |
| GRID* | 122 |      |    |  |  |    | 1.950000047683721. |
| *     | 0.  |      |    |  |  |    |                    |
| GRID  | 123 | 2.   | 1. |  |  | 0. |                    |

\$ Loads for Load Case : load

|        |   |    |    |   |    |   |  |
|--------|---|----|----|---|----|---|--|
| SPCADD | 2 | 1  |    |   |    |   |  |
| LOAD   | 2 | 1. | 1. | 1 | 1. | 3 |  |

\$ Displacement Constraints of Load Set : disp

|      |   |        |    |  |  |  |  |
|------|---|--------|----|--|--|--|--|
| SPC1 | 1 | 123456 | 21 |  |  |  |  |
|------|---|--------|----|--|--|--|--|

\$ Loads for Load Case : load\_1

|        |   |    |    |   |    |   |  |
|--------|---|----|----|---|----|---|--|
| SPCADD | 4 | 3  |    |   |    |   |  |
| LOAD   | 5 | 1. | 1. | 4 | 1. | 6 |  |

\$ Displacement Constraints of Load Set : disp1

|      |   |        |    |  |  |  |  |
|------|---|--------|----|--|--|--|--|
| SPC1 | 3 | 123456 | 93 |  |  |  |  |
|------|---|--------|----|--|--|--|--|

\$ Nodal Forces of Load Set : f100

|       |   |    |   |      |    |    |    |
|-------|---|----|---|------|----|----|----|
| FORCE | 1 | 62 | 0 | 100. | 0. | 1. | 0. |
|-------|---|----|---|------|----|----|----|

\$ Nodal Forces of Load Set : f100\_1

|       |   |     |   |      |    |    |    |
|-------|---|-----|---|------|----|----|----|
| FORCE | 4 | 123 | 0 | 100. | 0. | 1. | 0. |
|-------|---|-----|---|------|----|----|----|

\$ Nodal Forces of Load Set : f200\_1

|       |   |    |   |      |    |    |    |
|-------|---|----|---|------|----|----|----|
| FORCE | 6 | 63 | 0 | 200. | 0. | 1. | 0. |
|-------|---|----|---|------|----|----|----|

\$ Nodal Forces of Load Set : f200

|       |   |   |   |      |    |    |    |
|-------|---|---|---|------|----|----|----|
| FORCE | 3 | 1 | 0 | 200. | 0. | 1. | 0. |
|-------|---|---|---|------|----|----|----|

\$ Referenced Coordinate Frames

ENDDATA 352de98a
